# Supplementary material
Source: Research Square preprint supplement (doi:10.21203/rs.3.rs-9860106/v1)
Supplement: Supplementary file 1 [file 0d5c109b346cb1ca682a2647.xlsx]

## Sheet: database
url	title	DOI	Year	First Author	Country of First Author	Institution of First Author	No. of authors	No. of affiliations listed	Study Design	Journal	List of Keywords (paste from abstract)	Funding Source	Task Category	Pathology category	Anatomical region category	DL architecture type	Comparison study?	Performance metrics	Other reported metrics	Open Source data	Open Source code	Ground Truth Type
https://www.cochranelibrary.com/central/doi/10.1002/central/CN-02348483/full	Deep Learning Image Processing Enables 40% Faster Spinal MR Scans Which Match or Exceed Quality of Standard of Care : a Prospective Multicenter Multireader Study	10.1007/s00062-021-01121-2	2022	Bash, S and Johnson, B and Gibbs, W and Zhang, T and Shankaranarayanan, A and Tanenbaum, LN	USA	RadNet, San Fernando Interventional Radiology, Los Angeles	6	6	Prospective, randomized case-control study	Clinical Neuroradiology	*Deep Learning;*artificial intelligence;*deep learning;*health care quality;*image processing;*nuclear magnetic resonance imaging;*prospective study;*spine;Adult;Article;Artifact reduction;Clinical practice;Controlled study;Female;Human;Humans;Image Processing, Computer‚ÄêAssisted;Image quality;Magnetic Resonance Imaging [methods];Major clinical study;Male;Multicenter study;Neuroradiologist;Prosp…	2	5	9	5	1	1	N/A	SSM, per-pixel L1 difference, SSIM	N	N	R
https://www.cochranelibrary.com/central/doi/10.1002/central/CN-02159290/full	Faster RCNN-based detection of cervical spinal cord injury and disc degeneration	10.1002/acm2.13001	2020	Ma, S and Huang, Y and Che, X and Gu, R	China	Department of Orthopedics, China-Japan Union Hospital of Jilin University, Changchun, Jilin, China	4	2	Retrospective study	Journal of Applied Clinical Medical Physics	*Cervical Cord [diagnostic imaging];*Intervertebral Disc Degeneration [diagnostic imaging];*cervical spinal cord;*intervertebral disk degeneration;Diagnostic imaging;Human;Humans;Magnetic Resonance Imaging;Neural Networks, Computer;Nuclear magnetic resonance imaging;Retrospective Studies;Retrospective study	1	3	9	1	1	2	N/A	mAP	N	N	R
https://www.cochranelibrary.com/central/doi/10.1002/central/CN-02491978/full	Multiparametric MRI-Based Radiomics Approaches for Preoperative Prediction of EGFR Mutation Status in Spinal Bone Metastases in Patients with Lung Adenocarcinoma	10.1002/jmri.27579	2021	Jiang, X and Ren, M and Shuang, X and Yang, H and Shi, D and Lai, Q and Dong, Y	China	Department of Biomedical Engineering, School of Fundamental Sciences, China Medical University, Shenyang, China	7	3	Retrospective study	Journal of Magnetic Resonance Imaging	*bone metastasis;*cancer patient;*cancer surgery;*deep learning;*gene mutation;*lung adenocarcinoma;*multiparametric magnetic resonance imaging;*prediction;*radiomics;Adenocarcinoma of Lung [diagnostic imaging, genetics];Adult;Article;Calibration;Clinical evaluation;Clinical feature;Controlled study;ErbB Receptors [genetics];Female;Human;Humans;Lung Neoplasms [diagnostic imaging, genetics];Magnet…	1	4	2	3	1	2	1 - 3 - 5	N/A	N	N	P
https://www.cochranelibrary.com/central/doi/10.1002/central/CN-02006926/full	Spine Explorer: a deep learning based fully automated program for efficient and reliable quantifications of the vertebrae and discs on sagittal lumbar spine MR images	10.1016/j.spinee.2019.11.010	2020	Huang, J and Shen, H and Wu, J and Hu, X and Zhu, Z and Lv, X and Liu, Y and Wang, Y	China	Spine Lab, Department of Orthopedic Surgery, The First Affiliated Hospital, Zhejiang University School of Medicine, Hangzhou, China	8	5	Cross-sectional study	The Spine Journal	*deep learning;*image processing;*intervertebral disk degeneration;*lumbar vertebra;*nuclear magnetic resonance imaging;Adult;Age;Article;Controlled study;Convolutional neural network;Correlation coefficient;Cross‚ÄêSectional Studies;Cross‚Äêsectional study;Deep Learning;Female;Human;Humans;Imaging software;Intervertebral Disc;Intervertebral Disc Degeneration [diagnostic imaging];Lumbar Vertebrae…	0	1	1	3	1	2	9	ICC, Bland–Altman analysis, Kendall’s Tau (rK), Pearson correlation coefficient (r)	N	N	R
https://www.cochranelibrary.com/central/doi/10.1002/central/CN-02742288/full	Deep learning reconstructed T2-weighted Dixon imaging of the spine: impact on acquisition time and image quality	10.1016/j.ejrad.2024.111633	2024	Berkarda, Z and Wiedemann, S and Wilpert, C and Strecker, R and Koerzdoerfer, G and Nickel, D and Bamberg, F and Benndorf, M and Mayrhofer, T and Russe, MF and et al.	Germany	Department of Diagnostic and Interventional Radiology, University Medical Center Freiburg, Faculty of Medicine, University of Freiburg, Germany	12	5	Prospective study	European Journal of Radiology	*Deep Learning;*Magnetic Resonance Imaging [methods];*deep learning;*image quality;*spine;Adult;Aged;Algorithm;Article;Artifacts;Clinical article;Data consistency;Female;Human;Humans;Image Interpretation, Computer‚ÄêAssisted [methods];Image analysis;Likert scale;Lumbar Vertebrae [diagnostic imaging];Lumbar spine;Male;Middle Aged;Nuclear magnetic resonance imaging;Prospective Studies;Questionnaire…	0	5	9	3	1	1	N/A	Cohen’s kappa, Coefficient of variation, Wilcoxon signed-rank test, Mann–Whitney U test, Rank-biserial correlation	N	N	R
https://www.cochranelibrary.com/central/doi/10.1002/central/CN-02456273/full	Bone visualization of the cervical spine with deep learning-based synthetic CT compared to conventional CT: a single-center noninferiority study on image quality	10.1016/j.ejrad.2022.110414	2022	van der Kolk, BBYM and Slotman, DJJ and Nijholt, IM and van Osch, JAC and Snoeijink, TJ and Podlogar, M and van Hasselt, BAAM and Boelhouwers, HJ and van Stralen, M and Seevinck, PR and et al.	The Netherlands	Department of Radiology and Nuclear Medicine, Isala, P.O. Box 10400, 8000 GK Zwolle, The Netherlands	13	8	Noninferiority study	European Journal of Radiology	*deep learning;*image quality;*intervertebral disk;*nuclear magnetic resonance imaging;Adult;Artifact;Clinical article;Conference abstract;Controlled study;Female;Human;Interrater reliability;Male;Middle aged;Noise;Prospective study;Radiologist;Randomized controlled trial;Vertebral canal;Zygapophyseal joint	2	5	9	1	1	1	2 - 7	Structural similarity index, ICC, weighted Cohen’s kappa	N	N	R
https://www.cochranelibrary.com/central/doi/10.1002/central/CN-02575622/full	Identification of Origin for Spinal Metastases from MR Images: comparison Between Radiomics and Deep Learning Methods	10.1016/j.wneu.2023.04.029	2023	Duan, S and Cao, G and Hua, Y and Hu, J and Zheng, Y and Wu, F and Xu, S and Rong, T and Liu, B	China	Department of Orthopaedic Surgery, Beijing Tiantan Hospital, Capital Medical University, Beijing, China	9	6	Retrospective study	World Neurosurgery	*acceleration;*deep learning;*prospective study;*spine;Adult;Artifact reduction;Cerebrospinal fluid;Conference abstract;Controlled study;Female;Health care quality;Human;Image enhancement;Image quality;Interrater reliability;Likert scale;Major clinical study;Male;Multicenter study;Neuroradiologist;Nuclear magnetic resonance imaging;Randomized controlled trial	1	4	2	9	1	3	1 - 3	ROC analysis, Spearman correlation coefficient, Mann–Whitney U test	N	P	P
https://www.cochranelibrary.com/central/doi/10.1002/central/CN-02748812/full	Deep Learning-Generated Synthetic MR Imaging STIR Spine Images Are Superior in Image Quality and Diagnostically Equivalent to Conventional STIR: a Multicenter, Multireader Trial	10.3174/ajnr.A7920	2023	Tanenbaum, LN and Bash, SC and Zaharchuk, G and Shankaranarayanan, A and Chamberlain, R and Wintermark, M and Beaulieu, C and Novick, M and Wang, L	USA	Radnet, New York, New York	9	6	Prospective noninferiority study	American Journal of Neuroradiology	Artifacts;Artificial Intelligence;Cervical Vertebrae [diagnostic imaging];Deep Learning;Humans;Magnetic Resonance Imaging [methods];Tomography, X‚ÄêRay Computed [methods]	0	5	9	5	1	1	8	RMSPE, Bland–Altman analysis, Passing–Bablok regression, Wilcoxon signed-rank test, t test	N	N	R
	Development of a deep learning radiomics model combining lumbar CT, multi-sequence MRI, and clinical data to predict high-risk cage subsidence after lumbar fusion: a retrospective multicenter study.	10.1186/s12938-025-01355-y	2025	Zou, Congying and Zou C and Chen, Ruiyuan and Chen R and Wang, Baodong and Wang B and Fei, Qi and Fei Q and Song, Hongxing and Song H and Zang, Lei and Zang L	China	Department of Orthopedics, Beijing Chaoyang Hospital, Capital Medical University, Beijing	6	4	Retrospective study	Biomedical engineering online	Deep Learning;Humans;Lung Neoplasms [diagnostic imaging];Magnetic Resonance Imaging;Retrospective Studies;Spinal Neoplasms [diagnostic imaging]	1	4	1	3	6	3	1 - 3 - 4 - 5	N/A	N	P	R
	Deep-learning reconstructed lumbar spine 3D MRI for surgical planning: pedicle screw placement and geometric measurements compared to CT.	10.1007/s00586-023-08123-3	2024	Abel, Frederik and Abel F and Lebl, Darren R and Lebl DR and Gorgy, George and Gorgy G and Dalton, David and Dalton D and Chazen, J Levi and Chazen JL and Lim, Elisha and Lim E and Li, Qian and Li Q and Sneag, Darryl B and Sneag DB and Tan, Ek T and Tan ET	USA	Department of Radiology and Imaging, Hospital for Special Surgery, New York, NY, USA	9	3	Retrospective study	European spine journal	*Deep Learning;Humans;Image Processing, Computer‚ÄêAssisted;Magnetic Resonance Imaging [methods];Spine [diagnostic imaging]	2	9	1	3	1	3	N/A	Equivalency margin, intraclass correlation coefficient (ICC) and inter-/intra-rater reliability	N	N	R
	Deep learning-based prediction of cervical canal stenosis from mid-sagittal T2-weighted MRI.	10.1007/s00256-025-04917-2	2025	Rhee, Wounsuk and Rhee W and Park, Sung Cheol and Park SC and Kim, Hyoungmin and Kim H and Chang, Bong-Soon and Chang BS and Chang, Sam Yeol and Chang SY	Republic of Korea	Ministry of Health and Welfare, Government of the Republic of Korea	5	6	Retrospective study	Skeletal radiology	Adult;Aged;Female;Humans;Male;Middle Aged;*Deep Learning;*Image Processing, Computer-Assisted;*Lumbar Vertebrae/diagnostic imaging/surgery;Magnetic Resonance Imaging;*Radiomics;Retrospective Studies;*Spinal Fusion/adverse effects;Tomography, X-Ray Computed;*Postoperative Complications/epidemiology/etiology;Risk Assessment/methods	1	4	1	1	1	0	1 - 3 - 5	N/A	N	Y	R
	External Validation of SpineNet, an Open-Source Deep Learning Model for Grading Lumbar Disk Degeneration MRI Features, Using the Northern Finland Birth Cohort 1966.	10.1097/BRS.0000000000004572	2023	McSweeney, Terence P and McSweeney TP and Tiulpin, Aleksei and Tiulpin A and Saarakkala, Simo and Saarakkala S and Niinim√§ki, Jaakko and Niinim√§ki J and Windsor, Rhydian and Windsor R and Jamaludin, Amir and Jamaludin A and Kadir, Timor and Kadir T and Karppinen, Jaro and Karppinen J and M√§√§tt√§, Juhani and M√§√§tt√§ J	Finland	Research Unit of Health Sciences and Technology, University of Oulu	9	7	Retrospective study	Spine	Humans;*Pedicle Screws;*Lumbar Vertebrae/diagnostic imaging/surgery;*Tomography, X-Ray Computed/methods;*Magnetic Resonance Imaging/methods;Male;Female;Middle Aged;*Imaging, Three-Dimensional/methods;*Deep Learning;*Spinal Fusion/methods;Aged;Retrospective Studies;Adult	1	2	1	3	1	1	1 - 5	N/A	N	Y	R
	Establishment and validation of a ResNet-based radiomics model for predicting prognosis in cervical spinal cord injury patients.	10.1038/s41598-025-94358-7	2025	Zhang, Zifeng and Zhang Z and Li, Ning and Li N and Ding, Yi and Ding Y and Sun, Haowei and Sun H and Cheng, Huilin and Cheng H	China	School of Medicine, Southeast University, Nanjing, China	5	4	Retrospective study	Scientific reports	*Deep Learning;Risk Assessment/methods;*Spinal Cord Compression/epidemiology;Retrospective Studies;Magnetic Resonance Imaging;*Cervical Vertebrae/diagnostic imaging/pathology;ROC Curve;*Spinal Stenosis/complications/epidemiology/pathology;*Image Interpretation, Computer-Assisted/methods;Humans;Male;Female;Adult;Middle Aged;Aged	1	4	3	1	1	0	1 - 3 - 5	N/A	N	Y	R
	A novel deep learning system for automated diagnosis and grading of lumbar spinal stenosis based on spine MRI: model development and validation.	10.3171/2025.4.FOCUS24670	2025	Wang, Tianyi and Wang T and Wang, Aobo and Wang A and Zhang, Yiling and Zhang Y and Liu, Xingyu and Liu X and Fan, Ning and Fan N and Yuan, Shuo and Yuan S and Du, Peng and Du P and Wu, Qichao and Wu Q and Chen, Ruiyuan and Chen R and Xi, Yu and Xi Y and Gu, Zhao and Gu Z and Fei, Qi and Fei Q and Zang, Lei and Zang L	China	Department of Orthopedics, Beijing Chaoyang Hospital, Capital Medical University, Beijing, China	13	6	Retrospective study	Neurosurgical focus	Humans;*Intervertebral Disc Degeneration/diagnostic imaging/pathology;*Low Back Pain/diagnostic imaging/pathology;Birth Cohort;Finland/epidemiology;Reproducibility of Results;*Deep Learning;Lumbar Vertebrae/diagnostic imaging/pathology;Magnetic Resonance Imaging/methods	1	0	1	3	1	3	1 - 3 - 4 - 5 - 6	mAP, Cohen's kappa coefficient	N	N	R
	A Deep-Learning-Based, Fully Automated Program to Segment and Quantify Major Spinal Components on Axial Lumbar Spine Magnetic Resonance Images.	10.1093/ptj	2021	Shen, Haotian and Shen H and Huang, Jiawei and Huang J and Zheng, Qiangqiang and Zheng Q and Zhu, Zhiwei and Zhu Z and Lv, Xiaoqiang and Lv X and Liu, Yong and Liu Y and Wang, Yue and Wang Y	China	Spine Lab, Department of Orthopedic Surgery, Zhejiang University School of Medicine, Hangzhou, China	7	4	Cross-sectional study	Physical therapy	Humans;*Spinal Cord Injuries/diagnostic imaging/diagnosis;Male;Female;Prognosis;Middle Aged;Adult;Retrospective Studies;Deep Learning;Magnetic Resonance Imaging/methods;*Cervical Cord/diagnostic imaging/injuries;Cervical Vertebrae/diagnostic imaging;Aged;ROC Curve;Radiomics	1	1	0	3	1	2	2 - 9	false-positive fraction, true-positive fraction, intraclass correlation coefficient (ICC), Bland–Altman analysis	N	N	R
	Automated vertebral bone quality score measurement on lumbar MRI using deep learning: Development and validation of an AI algorithm.	10.1016/j.clineuro.2025.109094	2025	Jayasuriya, Nishantha M and Jayasuriya NM and Feng, Emily and Feng E and Nathani, Karim Rizwan and Nathani KR and Delawan, Maliya and Delawan M and Katsos, Konstantinos and Katsos K and Bhagra, Ojas and Bhagra O and Freedman, Brett A and Freedman BA and Bydon, Mohamad and Bydon M	USA	Mayo Clinic, Department of Radiology, Rochester, MN	8	4	Retrospective study	Clinical neurology and neurosurgery	Humans;*Spinal Stenosis/diagnostic imaging;*Deep Learning;*Magnetic Resonance Imaging/methods;Male;Female;*Lumbar Vertebrae/diagnostic imaging/surgery;Middle Aged;Aged;Retrospective Studies;Reproducibility of Results;Adult;Aged, 80 and over	0	7	1	3	1	1	6 - 8	mAP, ICC, Pearson correlation coefficient, mean error	Y	N	R
	MRI grading of lumbar disc herniation based on AFFM-YOLOv8 system.	10.1038/s41598-025-18417-9	2025	Wang, Yanfei and Wang Y and Yang, Zong and Yang Z and Cai, Songlin and Cai S and Wu, Weiwen and Wu W and Wu, Weifei and Wu W	China	The First College of Clinical Medical Science, China Three Gorges University, Yichang, China	5	7	Retrospective study	Scientific reports	Adult;Aged;Aged, 80 and over;China;Cross-Sectional Studies;*Deep Learning;Female;Humans;Image Processing, Computer-Assisted;Lumbar Vertebrae/*diagnostic imaging;*Magnetic Resonance Imaging;Male;Middle Aged;Paraspinal Muscles/*diagnostic imaging;Young Adult	1	2	1	3	1	3	1 - 3 - 4 - 5 - 6	ROC curve, confusion matrix	N	N	R
	Computerized Characterization of Spinal Structures on MRI and Clinical Significance of 3D Reconstruction of Lumbosacral Intervertebral Foramen.	http://www.painphysicianjournal.com/linkout?issn=&vol=25&page=E27	2022	Liu, Zheng and Liu Z and Su, Zhihai and Su Z and Wang, Min and Wang M and Chen, Tao and Chen T and Cui, Zhifei and Cui Z and Chen, Xiaojun and Chen X and Li, Shaolin and Li S and Feng, Qianjin and Feng Q and Pang, Shumao and Pang S and Lu, Hai and Lu H	China	Fifth Affiliated Hospital of Sun Yat-sen University, Department of Spinal Surgery, Zhuhai, Guangdong, China	10	3	Observational study	Pain physician	Humans;*Lumbar Vertebrae/diagnostic imaging/surgery;*Magnetic Resonance Imaging/methods;*Deep Learning;Female;Male;Middle Aged;Algorithms;Aged;Adult	1	1	9	4	2	0	2 - 6	ICC, Pearson correlation coefficient, Bland–Altman analysis	N	N	R
	Comparison of lumbar disc degeneration grading between deep learning model SpineNet and radiologist: a longitudinal study with a 14-year follow-up.	10.1007/s00586-025-08900-2	2025	Murto, Niko and Murto N and Lund, Teija and Lund T and Kautiainen, Hannu and Kautiainen H and Luoma, Katariina and Luoma K and Kerttula, Liisa and Kerttula L	Finland	Department of Radiology, University of Helsinki and Helsinki University Hospital, Helsinki, Finland	5	4	Longitudinal study	European spine journal	Adult;Female;Humans;Male;Middle Aged;Deep Learning;Intervertebral Disc Degeneration/diagnostic imaging;*Intervertebral Disc Displacement/diagnostic imaging/pathology;*Lumbar Vertebrae/diagnostic imaging/pathology;*Magnetic Resonance Imaging/methods	1	2	1	3	1	1	3	Kappa statistic (κ), Concordance Correlation Coefficient (CCC), Bland–Altman analysis	N	Y	R
	Accelerated Spine MRI with Deep Learning Based Image Reconstruction: A Prospective Comparison with Standard MRI.	10.1016/j.acra.2024.11.004	2025	Li, Jie and Li J and Xia, Yi and Xia Y and Zhou, Taohu and Zhou T and Dong, Qian and Dong Q and Lin, Xiaoqing and Lin X and Gu, Lingling and Gu L and Jiang, Song and Jiang S and Xu, Meiling and Xu M and Wan, Xinyi and Wan X and Duan, Guangwen and Duan G and Zhu, Dongqing and Zhu D and Chen, Rutan and Chen R and Zhang, Zhihao and Zhang Z and Xiang, Lei and Xiang L and Fan, Li and Fan L and Liu, Sh…	China	Department of Radiology, Second Affiliated Hospital of Naval Medical University, Shanghai, China	16	4	Prospective study	Academic radiology	Humans;*Imaging, Three-Dimensional/methods;*Intervertebral Disc;Lumbar Vertebrae/diagnostic imaging/surgery;Lumbosacral Region;Magnetic Resonance Imaging/methods	1	5	9	5	1	1	7	SSIM, PSNR, correlation coefficient, Cohen's kappa, McNemar test, SNR, CNR, Individual equivalence index	N	N	R
	Assessment of T2-weighted MRI-derived synthetic CT for the detection of suspected lumbar facet arthritis: a comparative analysis with conventional CT.	10.1007/s00586-025-08958-y	2025	Cao, Gan and Cao G and Wang, Haiqiao and Wang H and Xie, Shanghuang and Xie S and Cai, Die and Cai D and Guo, Jiandong and Guo J and Zhu, Jichao and Zhu J and Ye, Keliang and Ye K and Wang, Yi and Wang Y and Xia, Jun and Xia J	China	Department of Radiology, Longgang Central Hospital of Shenzhen, Shenzhen, China	9	5	Retrospective study	European spine journal :	Humans;*Intervertebral Disc Degeneration/diagnostic imaging;Male;*Deep Learning;*Lumbar Vertebrae/diagnostic imaging;Longitudinal Studies;Follow-Up Studies;Magnetic Resonance Imaging;Adult;Middle Aged;*Radiologists;Observer Variation	1	8	1	3	4	3	2 - 3 - 5 - 7	SSIM, PSNR, PPV, NPV, ICC	N	N	R
	AI-based lumbar central canal stenosis classification on sagittal MR images is comparable to experienced radiologists using axial images.	10.1007/s00330-024-11080-0	2025	van der Graaf, Jasper W and van der Graaf JW and Brundel, Liron and Brundel L and van Hooff, Miranda L and van Hooff ML and de Kleuver, Marinus and de Kleuver M and Lessmann, Nikolas and Lessmann N and Maresch, Bas J and Maresch BJ and Vestering, Myrthe M and Vestering MM and Spermon, Jacco and Spermon J and van Ginneken, Bram and van Ginneken B and Rutten, Matthieu J C M and Rutten MJCM	The Netherlands	Diagnostic Image Analysis Group, Radboud University Medical Center, Nijmegen, Netherlands	10	5	Retrospective study	European radiology	Humans;*Deep Learning;Male;*Magnetic Resonance Imaging/methods;Prospective Studies;Middle Aged;Female;Adult;*Spinal Diseases/diagnostic imaging;*Spine/diagnostic imaging;Signal-To-Noise Ratio;Aged;*Image Interpretation, Computer-Assisted/methods	1	2	1	3	1	3	1 - 3 - 5	Cohen’s weighted kappa (κw), PPV, NPV	N	N	R
	Super-resolution Deep Learning Reconstruction Cervical Spine 1.5T MRI: Improved Interobserver Agreement in Evaluations of Neuroforaminal Stenosis Compared to Conventional Deep Learning Reconstruction.	10.1007/s10278-024-01112-y	2024	Yasaka, Koichiro and Yasaka K and Uehara, Shunichi and Uehara S and Kato, Shimpei and Kato S and Watanabe, Yusuke and Watanabe Y and Tajima, Taku and Tajima T and Akai, Hiroyuki and Akai H and Yoshioka, Naoki and Yoshioka N and Akahane, Masaaki and Akahane M and Ohtomo, Kuni and Ohtomo K and Abe, Osamu and Abe O and Kiryu, Shigeru and Kiryu S	Japan	Department of Radiology, Graduate School of Medicine, University of Tokyo, Tokyo, Japan	11	5	Retrospective study	Journal of imaging informatics in medicine	Humans;Male;Female;Adult;*Magnetic Resonance Imaging/methods;Retrospective Studies;*Tomography, X-Ray Computed/methods;*Lumbar Vertebrae/diagnostic imaging;Middle Aged;*Zygapophyseal Joint/diagnostic imaging;*Arthritis/diagnostic imaging;Sensitivity and Specificity;Deep Learning;Aged	0	5	1	1	1	1	N/A	SNR, CNR, edge slope, SSIM, and Cohen’s weighted kappa	N	N	R
	Evaluation of MRI-based synthetic CT for lumbar degenerative disease: a comparison with CT.	10.1038/s41598-025-05399-x	2025	Jiang, Ziwei and Jiang Z and Zhu, Yuhang and Zhu Y and Wang, Wei and Wang W and Li, Zongbao and Li Z and Li, Yunxi and Li Y and Zhang, Mengchao and Zhang M	China	Department of Radiology, China-Japan Union Hospital of Jilin University, Changchun, China	6	4	Prospective study	Scientific reports	Humans;*Magnetic Resonance Imaging/methods;*Spinal Stenosis/diagnostic imaging/classification;Female;Male;Middle Aged;*Lumbar Vertebrae/diagnostic imaging;Aged;Algorithms;*Artificial Intelligence;Radiologists;Adult;*Image Interpretation, Computer-Assisted/methods;Sensitivity and Specificity;Reproducibility of Results	0	8	1	3	1	3	N/A	Cohen's kappa, ICC, HU measurements and p-values	N	N	R
	Development and validation of AI-based automatic measurement of coronal Cobb angles in degenerative scoliosis using sagittal lumbar MRI.	10.1007/s00330-024-10616-8	2024	van der Graaf, Jasper W and van der Graaf JW and van Hooff, Miranda L and van Hooff ML and van Ginneken, Bram and van Ginneken B and Huisman, Merel and Huisman M and Rutten, Matthieu and Rutten M and Lamers, Dominique and Lamers D and Lessmann, Nikolas and Lessmann N and de Kleuver, Marinus and de Kleuver M	The Netherlands	Diagnostic Image Analysis Group, Radbound University Medical Center, Nijmegen, Netherlands	8	5	Retrospective study	European radiology	Humans;*Deep Learning;*Cervical Vertebrae/diagnostic imaging/pathology;*Observer Variation;Female;*Magnetic Resonance Imaging/methods;Male;Middle Aged;Retrospective Studies;Aged;Adult;Spinal Stenosis/diagnostic imaging/pathology;Image Processing, Computer-Assisted/methods;Signal-To-Noise Ratio;Aged, 80 and over;Image Interpretation, Computer-Assisted/methods	1	1	4	3	2	1	7	ICC, Bland–Altman limits of agreement	Y	Y	R
	Evaluating CNN Architectures for the Automated Detection and Grading of Modic Changes in MRI: A Comparative Study.	10.1111/os.14280	2025	Xing, Li-Peng and Xing LP and Liu, Gang and Liu G and Zhang, Hao-Chen and Zhang HC and Wang, Lei and Wang L and Zhu, Shan and Zhu S and Bao, Man Du La Hua and Bao MDH and Wang, Yan-Ni and Wang YN and Chen, Chao and Chen C and Wang, Zhi and Wang Z and Liu, Xin-Yu and Liu XY and Zhang, Shuai and Zhang S and Yang, Qiang and Yang Q	China	State Key Laboratory of Reliability and Intelligence of Electrical Equipment, Hebei University of Technology, Tianjin, China	12	3	Retrospective study	Orthopaedic surgery	Humans;Female;Male;Middle Aged;*Magnetic Resonance Imaging/methods;Adult;Aged;*Tomography, X-Ray Computed/methods;*Lumbar Vertebrae/diagnostic imaging/pathology;Prospective Studies;Aged, 80 and over;Young Adult;*Intervertebral Disc Degeneration/diagnostic imaging	1	3	1	3	1	3	4 - 6	Confusion matrix, mAP	N	N	R
https://ieeexplore.ieee.org/stamp/stamp.jsp?tp=&arnumber=9444363&isnumber=9312710	Deep Learning-Based Automatic Segmentation for Reconstructing Vertebral Anatomy of Healthy Adolescents and Patients With Adolescent Idiopathic Scoliosis (AIS) Using MRI Data,	10.1109/ACCESS.2021.3084949.	2021	M. Antico	Australia	Centre for Children’s Health Research, Queensland University of Technology, Brisbane, Australia	7	4	Retrospective study	IEEE Access	Humans;*Scoliosis/diagnostic imaging;*Magnetic Resonance Imaging/methods;Female;Male;*Lumbar Vertebrae/diagnostic imaging;*Algorithms;Reproducibility of Results;Retrospective Studies;Aged;Middle Aged;Aged, 80 and over;Artificial Intelligence;Adult;Imaging, Three-Dimensional/methods	0	1	4	2	1	1	2	N/A	N	N	R
https://ieeexplore.ieee.org/stamp/stamp.jsp?tp=&arnumber=8678637&isnumber=8600701	Boundary Delineation of MRI Images for Lumbar Spinal Stenosis Detection Through Semantic Segmentation Using Deep Neural Networks,	10.1109/ACCESS.2019.2908002.	2019	A. S. Al-Kafri	United Kingdom	Department of Computer Science, Liverpool John Moores University, Liverpool, UK	10	4	Retrospective study	IEEE Access	Humans;Retrospective Studies;*Magnetic Resonance Imaging/methods;*Neural Networks, Computer;Female;Male;Middle Aged;Deep Learning	1	1	1	3	1	2	3 - 9	BF-score, Cohen’s kappa, confidence metric, consistency metric	Y	Y	R
https://ieeexplore.ieee.org/stamp/stamp.jsp?tp=&arnumber=11123689&isnumber=6363502	Pathology-Guided AI System for Accurate Segmentation and Diagnosis of Cervical Spondylosis,	10.1109/JBHI.2025.3598469.	2025	Q. Zhang	China	School of Biomedical Engineering, Shanghai Jian Tong University, Shanghai, China	7	5	Retrospective study	IEE Journal of Biomedical and Health Informatics	Magnetic resonance imaging;Artificial intelligence;Three-dimensional displays;Image segmentation;Training;Surgery;Pathology;Deep learning;CNN;segmentation;scoliosis;MRI;vertebral body;posterior process;AIS},	1	0	1	1	1	3	1 - 2 - 3 - 5 - 6 - 7 - 9	ICC, Pearson correlation coefficient, Youden index	N	Y	R
https://ieeexplore.ieee.org/stamp/stamp.jsp?tp=&arnumber=10630475&isnumber=10380310	FractalSpiNet: Fractal-Based U-Net for Automatic Segmentation of Cervical Spinal Cord and MS Lesions in MRI,	10.1109/ACCESS.2024.3439892.	2024	R. Polatt√≠mur, E. Dandil, M. S. Yildirim, S. Ulu√ßay and U. ≈ûenol	Turkey	Department of Computer Engineering, Karabük University, Karabük, Turkey	5	4	Retrospective study	IEEE Access	Magnetic resonance imaging;Spine;Image segmentation;Measurement;Pain;Semantics;Hospitals;Lumbar spine MRI;lumbar spinal stenosis;semantic segmentation;boundary delineation;deep learning},	0	0	5	6	1	2	2 - 6	N/A	N	N	R
https://ieeexplore.ieee.org/stamp/stamp.jsp?tp=&arnumber=10419023&isnumber=10380310	A Deep Learning Harmonization of Multi-Vendor MRI for Robust Intervertebral Disc Segmentation,	10.1109/ACCESS.2024.3360272.	2024	C. Kim and S. -M. Park and S. Lee and D. Lee	Republic of Korea	Center for Healthcare Robotics, Korea Institute of Science and Technology (KIST), Seoul, Republic of Korea	4	4	Retrospective study	IEEE Access	Magnetic resonance imaging;Image segmentation;Spinal cord;Accuracy;Pathology;Hospitals;Deep learning;Training;Diseases;Bioinformatics;Cervical Spondylosis;Deep learning;Segmentation;AI-assisted diagnosis},	1	0	9	3	4	2	2 - 4 - 6 - 9	N/A	Y	N	R
https://ieeexplore.ieee.org/stamp/stamp.jsp?tp=&arnumber=8967067&isnumber=9216186	MRLN: Multi-Task Relational Learning Network for MRI Vertebral Localization, Identification, and Segmentation,	10.1109/JBHI.2020.2969084.	2020	R. Zhang and X. Xiao and Z. Liu and Y. Li and S. Li	China	School of Information Science and Engineering, Shandong University, Quingdao, China	5	3	Retrospective study	IEEE Journal of Biomedical and Health Informatics	Spinal cord;Lesions;Fractals;Image segmentation;Accuracy;Magnetic resonance imaging;Neurological diseases;Multiple sclerosis;Cervical spinal cord;multiple sclerosis;automatic segmentation;fractal networks;U-Net;FractalSpiNet},	1	0	9	3	6	2	1 - 3 - 5	Kappa statistic (κ), Concordance Correlation Coefficient (CCC), Bland–Altman analysis	N	N	R
https://ieeexplore.ieee.org/stamp/stamp.jsp?tp=&arnumber=9018285&isnumber=9248684	Multiple Axial Spine Indices Estimation via Dense Enhancing Network With Cross-Space Distance-Preserving Regularization,	10.1109/JBHI.2020.2977224.	2020	L. Lin	China	School of Biomedical Engineering, Southern Medical University, Guangzhou, China	8	3	Retrospective study	IEEE Journal of Biomedical and Health Informatics	Magnetic resonance imaging;Image segmentation;Feature extraction;Radiomics;Radio frequency;Computed tomography;Diseases;Harmonic analysis;Harmonization;magnetic resonance imaging;radiomics;segmentation},	1	7	9	3	1	2	2 - 3 - 6	Mean Absolute Distance (MAD), Root Mean Square Error (RMSE)	N	N	R
https://ieeexplore.ieee.org/stamp/stamp.jsp?tp=&arnumber=9222039&isnumber=9345548	Image-Guided Tethering Spine Surgery With Outcome Prediction Using Spatio-Temporal Dynamic Networks,	10.1109/TMI.2020.3030741.	2021	W. Mandel and R. Oulbacha and M. Roy-Beaudry and S. Parent and S. Kadoury	Canada	École Polytechnique de Montréal, Canada	5	2	Retrospective study	IEEE Transactions on Medical Imaging	Task analysis;Image segmentation;Magnetic resonance imaging;Semantics;Convolution;Informatics;Biomedical imaging;Localization;identification;segmentation;co-attention;XOR loss},	1	4	4	5	3	2	7	Mean Euclidean landmark error	N	N	M
https://ieeexplore.ieee.org/stamp/stamp.jsp?tp=&arnumber=9201093&isnumber=9310721	SpineParseNet: Spine Parsing for Volumetric MR Image by a Two-Stage Segmentation Framework With Semantic Image Representation,	10.1109/TMI.2020.3025087.	2021	S. Pang	China	Guangdong Provincial Key Laboratory of Medical Image Processing, School of Biomedical Engineering, Southern Medical University, Guangzhou, China	10	2	Retrospective study	IEEE Transactions on Medical Imaging	Estimation;Feature extraction;Machine learning;Biomedical measurement;Magnetic resonance imaging;Computational modeling;Biomedical imaging;Spine quantification;deep learning;dense connectivity;feature enhancement;cross-space distance-preserving regularization},	1	1	0	3	8	2	2 - 6	N/A	N	Y	R
https://ieeexplore.ieee.org/stamp/stamp.jsp?tp=&arnumber=11006703&isnumber=10820123	Nearest-Neighbor Dual-Path Contrastive Learning for Lumbar Disc Herniation MRI Image Classification,	10.1109/ACCESS.2025.3571014.	2025	D. Pan and Y. -X. Pan and H. Wang and Q. -J. Liu and C. -M. Qiu	China	Department of Rehabilitation Medicine, The First Affiliated Hospital of Gannan Medical University, Ganzhou, China	5	5	Retrospective study	IEEE Access	Surgery;Three-dimensional displays;Solid modeling;Predictive models;Forecasting;Magnetic resonance imaging;Modulation;Idiopathic scoliosis;image-guided spine surgery;vertebral tethering;spatio-temporal networks;outcome prediction},	0	2	1	3	1	2	3	N/A	Y	N	R
https://ieeexplore.ieee.org/stamp/stamp.jsp?tp=&arnumber=10962284&isnumber=6363502	A Deep Learning-Based Approach for the Diagnostic of Brucellar Spondylitis in Magnetic Resonance Images,	10.1109/JBHI.2025.3559909.	2025	D. Shao	China	School of Computer Science and Technology, Changchun University, Changchun, China	11	4	Retrospective study	IEEE Journal of Biomedical and Health Informatics	Image segmentation;Image representation;Semantics;Computed tomography;Three-dimensional displays;Two dimensional displays;Learning systems;Deep learning;spine;3D segmentation;graph convolution},	1	3	1	3	1	0	1 - 3 - 4 - 5 - 6	N/A	N	Y	R
https://ieeexplore.ieee.org/stamp/stamp.jsp?tp=&arnumber=10606496&isnumber=10380310	Inv-AlxVGGNets: Cervical Spine Disease Classification Using Concatenated Involutional Neural Networks With Residual Net,	10.1109/ACCESS.2024.3432803.	2024	B. M. Abuhayi, Y. Agegnehu Bezabh and A. Melese Ayalew	Ethiopia	Department of Information Technology, University of Gondar, Gondar, Ethiopia	3	1	Retrospective study	IEEE Access	Magnetic resonance imaging;Accuracy;Contrastive learning;Spine;Semantics;Image segmentation;Deep learning;Data models;Medical diagnostic imaging;Feature extraction;Lumbar spine disc classification;lumbar spine;contrastive learning;deep learning},	0	2	9	1	1	2	1 - 3 - 4 - 6	N/A	N	N	C
https://ieeexplore.ieee.org/stamp/stamp.jsp?tp=&arnumber=9903296&isnumber=9973412	A Deep Learning Model for Automatic Detection and Classification of Disc Herniation in Magnetic Resonance Images,	10.1109/JBHI.2022.3209585.	2022	T. ≈†u≈°ter≈°iƒç and V. Rankoviƒá and V. Milovanoviƒá and V. Kovaƒçeviƒá and L. Rasuliƒá and N. Filipoviƒá	Serbia	Faculty of Engineering, University of Kragujevac, Serbia	6	3	Retrospective study	IEEE Journal of Biomedical and Health Informatics	Lesions;Hospitals;Magnetic resonance imaging;Deep learning;Biological tissues;Training;Image segmentation;Diseases;Injuries;Dairy products;Brucellar spondylitis;T2-weighted MR images;deep learning;vertebral body lesion},	0	2	1	3	1	2	2 - 3 - 4 - 6 - 9	ROC curve, Confusion matrix	N	N	R
https://ieeexplore.ieee.org/stamp/stamp.jsp?tp=&arnumber=9732945&isnumber=9668973	Deep Learning-Based Disk Herniation Computer Aided Diagnosis System From MRI Axial Scans,	10.1109/ACCESS.2022.3158682.	2022	M. Alsmirat and N. Al-Mnayyis and M. Al-Ayyoub and A. Al-Mnayyis	United Arab Emirates	Department of Computer Science, University of Sharjah, Sharjah, United Arab Emirates	4	3	Retrospective study	IEEE Access	Diseases;Task analysis;Deep learning;Accuracy;Neural networks;Magnetic resonance imaging;Feature extraction;Spine;Convolutional neural networks;Machine learning;Biomedical image processing;Cervical spine disease;involution neural network;convolutional neural network;deep learning;machine learning;classification;medical image processing},	0	2	1	3	1	2	3	Loss error, confusion matrix, t-test statistics (p-value, t value)	N	N	R
https://ieeexplore.ieee.org/stamp/stamp.jsp?tp=&arnumber=11080083&isnumber=4359023	Attention-based Shape-Deformation Networks for Artifact-Free Geometry Reconstruction of Lumbar Spine from MR Images,	10.1109/TMI.2025.3588831.	2024	L. Qian and J. Chen and L. Ma and T. Urakov and W. Gu and L. Liang	USA	Department of Computer Science, University of Central Florida, USA	6	3	Retrospective study	IEEE TRANSACTIONS ON MEDICAL IMAGING	Image segmentation;Magnetic resonance imaging;Deep learning;Feature extraction;Convolutional neural networks;Decision support systems;Disc herniation;deep learning;segmentation;convolutional neural network;decision support system},	0	5	9	3	6	2	2	Standard deviation, Q5 statistics	N	N	R
https://ieeexplore.ieee.org/stamp/stamp.jsp?tp=&arnumber=9392234&isnumber=9508208	Quantifying Axial Spine Images Using Object-Specific Bi-Path Network,	10.1109/JBHI.2021.3070235.	2021	L. Lin	China	Guangdong Provincial Key Laboratory of Medical Image Processing, School of Biomedical Engineering, Southern Medical University (Guangzhou, China)	9	5	Retrospective study	IEEE Journal of Biomedical and Health Informatics	Magnetic resonance imaging;Convolutional neural networks;Irrigation;Image coding;Deep learning;Transfer learning;Solid modeling;Axial scans;augmentation;deep learning;disk herniation;transfer learning},	1	4	9	3	1	2	7	Training loss, test error	N	N	R
https://ieeexplore.ieee.org/stamp/stamp.jsp?tp=&arnumber=10440410&isnumber=10521573	Fully Automatic Fine-Grained Grading of Lumbar Intervertebral Disc Degeneration Using Regional Feature Recalibration Network,	10.1109/JBHI.2024.3366780.	2024	N. Tong	China	School of Biomedical Engineering, Southern Medical University, Guangzhou, China	7	4	Retrospective study	IEEE Journal of Biomedical and Health Informatics	Geometry;Spine;Image segmentation;Image reconstruction;Shape;Mathematical models;Deformable models;Deep learning;Deformation;Computed tomography;deep learning;geometry reconstruction;lumbar spine;mesh correspondence;attention},	1	2	1	3	1	0	1 - 3 - 4 - 5	Confusion matrix	N	N	R
https://ieeexplore.ieee.org/stamp/stamp.jsp?tp=&arnumber=8807102&isnumber=8600701	A Robust Scheme of Vertebrae Segmentation for Medical Diagnosis,	10.1109/ACCESS.2019.2936492.	2019	F. Rehman, S. I. Ali Shah, N. Riaz and S. O. Gilani	Pakistan	Department of Robotics and Intelligent Machine Engineering, National University of Sciences and Technology, Islamabad, Pakistan	4	3	Retrospective study	IEEE Access	Feature extraction;Biological systems;Task analysis;Medical services;Medical diagnostic imaging;Estimation;Convolution;Bi-path network;dissimilarity constraint;inter-index correlation;spine quantification},	0	1	9	5	1	2	2	Average absolute surface distance	P	N	R
https://ieeexplore.ieee.org/stamp/stamp.jsp?tp=&arnumber=10561545&isnumber=10736144	An Efficient Muscle Segmentation Method via Bayesian Fusion of Probabilistic Shape Modeling and Deep Edge Detection,	10.1109/TBME.2024.3415818.	2024	J. Wang, G. Chen, T. J. Zhang, N. Wu and X. Wang	China	Peking University, Human-Oriented Methodology and Equipment (HOME) Laboratory, College of Engineering, Beijing, China	5	3	Retrospective study	IEEE Transactions on Biomedical Engineering	Feature extraction;Boosting;Transformers;Back;Spine;Magnetic resonance imaging;Degenerative disc disease;Lumbar intervertebral disc degeneration;regional feature recalibration;fine-grained grading;magnetic resonance imaging;Pfirrmann grading},	1	1	9	3	1	2	2 - 3	Adjusted R²	N	N	R
	Automated Detection and Diagnosis of Spinal Schwannomas and Meningiomas Using Deep Learning and Magnetic Resonance Imaging	10.3390/jcm12155075 WE - Science Citation Index Expanded (SCI-EXPANDED)	2023	Ito, S and Nakashima, H and Segi, N and Ouchida, J and Oda, M and Yamauchi, I and Oishi, R and Miyairi, Y and Mori, K and Imagama, S	Japan	Department of Orthopedic Surgery, Nagoya University Graduate School of Medicine, Nagoya 466-8560, Japan;	10	4	Retrospective study	JOURNAL OF CLINICAL MEDICINE	Image segmentation;Bones;Level set;Shape;Object segmentation;Biomedical imaging;Task analysis;Intervertebral disk;thoracolumbar vertebrae;computed tomography;vertebrae segmentation;deep learning;computer aided diagnosis},	0	3	2	5	1	3	3 - 6	N/A	N	N	P
	Automatic lumbar spinal MRI image segmentation with a multi-scale attention network	10.1007/s00521-021-05856-4	2021	Li, HX and Luo, HB and Huan, W and Shi, ZL and Yan, CN and Wang, LB and Mu, YM and Liu, YP	China	Shenyang Institute of Automation, Chinese Academy of Sciences, No. 114 Nanta Street, Shenhe District, Shenyang City, Liaoning Province, China	8	6	Retrospective study	NEURAL COMPUTING & APPLICATIONS	Shape;Muscles;Image segmentation;Probabilistic logic;Three-dimensional displays;Image edge detection;Data models;Paraspinal muscle segmentation;anatomically interpretable modeling;Gaussian processes;fourier basis functions;Bayesian inference},	1	1	1	3	1	2	2	N/A	N	N	R
	Automated Detection of Spinal Schwannomas Utilizing Deep Learning Based on Object Detection From Magnetic Resonance Imaging	10.1097/BRS.0000000000003749 WE - Science Citation Index Expanded (SCI-EXPANDED)	2021	Ito, S and Ando, K and Kobayashi, K and Nakashima, H and Oda, M and Machino, M and Kanbara, S and Inoue, T and Yamaguchi, H and Koshimizu, H and Mori, K and Ishiguro, N and Imagama, S	Japan	Department of Orthopedic Surgery, Nagoya University Graduate School of Medicine, Nagoya, Japan	13	3	Retrospective study	SPINE	magnetic resonance imaging;deep learning;spinal cord neoplasms;meningioma;schwannoma;INTRADURAL TUMORS;INJURY	0	3	2	5	1	3	3 - 6	N/A	N	N	P
	Advanced deep learning-based image reconstruction in lumbar spine MRI at 0.55 T - Effects on image quality and acquisition time in comparison to conventional deep learning-based reconstruction	10.1016/j.ejro.2024.100567 WE - Emerging Sources Citation Index (ESCI)	2024	Schlicht, F and Vosshenrich, J and Donners, R and Seifert, AC and Fenchel, M and Nickel, D and Obmann, M and Harder, D and Breit, HC	Switzerland	Department of Radiology, University Hospital Basel, Petersgraben 4, Basel 4031, Switzerland	9	2	Prospective study	EUROPEAN JOURNAL OF RADIOLOGY OPEN	Lumbar spinal stenosis;Magnetic resonance imaging image;Deep learning;Dual-branch multi-scale attention module;Feature extraction;SEMANTIC SEGMENTATION	0	5	9	3	0	3	N/A	Likert scale scores, ICC, contrast ratios (CR1–CR3 based on ROI signal intensities), p-values (Mann–Whitney U test), acquisition time reduction percentage	N	N	R
	Deep Learning-Based Differentiation of Vertebral Body Lesions on Magnetic Resonance Imaging	10.3390/diagnostics15151862 WE - Science Citation Index Expanded (SCI-EXPANDED)	2025	Er, H and T√∂ren, M and Asan, B and Kaba, E and Beyazal, M	Turkey	Faculty of Medicine, Recep Tayyip Erdo˘gan University, Training and Research Hospital, Rize 53020, Türkiye	5	2	Retrospective study	DIAGNOSTICS	deep learning;object detection;spinal schwannoma;YOLO v3;INTRADURAL TUMORS;DIAGNOSIS;INJURY	1	3	9	5	1	0	3 - 4 - 6	mAP	N	N	R
	Super-resolution deep learning reconstruction approach for enhanced visualization in lumbar spine MR bone imaging	10.1016/j.ejrad.2024.111587	2024	Hokamura, M and Nakaura, T and Yoshida, N and Uetani, H and Shiraishi, K and Kobayashi, N and Matsuo, K and Morita, K and Nagayama, Y and Kidoh, M and Yamashita, Y and Miyamoto, T and Hirai, T	Japan	Department of Diagnostic Radiology, Graduate School of Medical Sciences, Kumamoto University, Honjo 1-1-1, Kumamoto 860-8556, Japan	13	4	Retrospective study	EUROPEAN JOURNAL OF RADIOLOGY	Lumbar Vertebrae;Magnetic Resonance Imaging;Deep Learning;Image Processing;Computer -Assisted;RELIABILITY;SYSTEM	0	5	9	3	0	3	N/A	SNR, contrast, CNR, profile slope, qualitative Likert scores, weighted Cohen’s kappa, and p-values	N	N	R
	A patch-based deep learning MRI segmentation model for improving efficiency and clinical examination of the spinal tumor	10.1016/j.jbo.2024.100649 WE - Science Citation Index Expanded (SCI-EXPANDED)	2024	Chen, WM and Han, Y and Ashraf, MA and Liu, JH and Zhang, M and Su, F and Huang, ZG and Wong, KKL	China	School of Information and Electronics, Hunan City University, Yiyang, Hunan 413000, China	8	4	Retrospective study	JOURNAL OF BONE ONCOLOGY	metastasis;vertebral body lesions;MRI;deep learning;YOLO-v8;detection;classification;SPINAL TUBERCULOSIS	0	1	2	5	1	2	2 - 3 - 4 - 6 - 9	N/A	P	N	R
	Technology and Tool Development for BACPAC: Qualitative and Quantitative Analysis of Accelerated Lumbar Spine MRI with Deep-Learning Based Image Reconstruction at 3T	10.1093/pm/pnad035 WE - Science Citation Index Expanded (SCI-EXPANDED)	2023	Han, MS and Bahroos, E and Hess, ME and Chin, CT and Gao, KT and Shin, DD and Villanueva-Meyer, JE and Link, TM and Pedoia, V and Majumdar, S	USA	Department of Radiology and Biomedical Imaging, University of California, San Francisco, San Francisco, CA, United States	10	3	Retrospective study	PAIN MEDICINE	Retrospective studies;Magnetic resonance imaging;MR bone imaging;Deep learning;Deep learning reconstruction;Super-resolution deep learning reconstruction;REDUCTION;CT	1	5	9	3	1	3	0	Likert scores (mean ± SD), p-values, Conger’s kappa (κ), percentage differences	N	N	R
	A dual channel and spatial attention network for automatic spine segmentation of MRI images	10.1002/ima.22896	2023	Cheng, MD and Qin, J and Lv, LR and Wang, B and Li, L and Xia, D and Wang, SK	China	School of Integrated Circuit Science and Engineering, Tianjin University of Technology, Tianjin, China	7	1	Retrospective study	INTERNATIONAL JOURNAL OF IMAGING SYSTEMS AND TECHNOLOGY	Gadolinium-enhanced T1 MRI;Spinal tumors;Full-automatic segmentation;Patch model;Deep learning;IMAGE;CNN	1	1	1	3	1	2	2 - 4 - 5 - 6 - 9	N/A	Y	N	R
	Benign and malignant diagnosis of spinal tumors based on deep learning and weighted fusion framework on MRI	10.1186/s13244-022-01227-2 WE - Science Citation Index Expanded (SCI-EXPANDED)	2022	Liu, H and Jiao, ML and Yuan, Y and Ouyang, HQ and Liu, JF and Li, Y and Wang, CJ and Lang, N and Qian, YL and Jiang, L and Yuan, HS and Wang, XD	China	Beijing Key Laboratory of Mobile Computing and Pervasive Device, Institute of Computing Technology, Chinese Academy of Sciences, Beijing, China	12	6	Retrospective study	INSIGHTS INTO IMAGING	lumbar spine MRI;lower back pain;fast acquisition;deep learning reconstruction;clinical MRI;segmentation;LOW-BACK-PAIN;DISC DEGENERATION;DIAGNOSIS;NETWORK;CARE	1	0	2	5	9	3	1 - 3 - 5	N/A	N	N	P
	Assessment of image quality and diagnostic accuracy for cervical spondylosis using T2w-STIR sequence with a deep learning-based reconstruction approach	10.1007/s00586-024-08409-0	2024	Tao, QY and Wang, KY and Wen, BH and Kang, YM and Dang, JH and Sun, JP and Niu, XY and Zhang, MZ and Liu, ZJ and Wang, WJ and Zhang, Y and Cheng, JL	China	Department of Magnetic Resonance Imaging, The First Affiliated Hospital of Zhengzhou University, No.1 Jianshe Dong Road, ErQi District, Zhengzhou, Henan, China	12	2	Retrospective study	EUROPEAN SPINE JOURNAL	computer vision;deep learning;dual channel and spatial attention module;MRI image;spine segmentation;VERTEBRAE;NET	1	5	1	1	1	1	N/A	Non-parametric tests (Wilsoxon), p-values, ICC, Conger's weighted kappa	N	N	R
	Spinal Cord Injury Identification and Localization Detection Based on MRI Imaging and Deep Learning Technology	10.18280/ts.410212 WE - Science Citation Index Expanded (SCI-EXPANDED)	2024	Shao, T and Xu, J and Dai, YQ	China	Center for Rehabilitation Medicine, Department of Orthopedics, Zhejiang Provincial People's Hospital (Affiliated People's Hospital, Hangzhou Medical College), Hangzhou 310014, China	3	2	Retrospective study	TRAITEMENT DU SIGNAL	Spine tumor;Benign;Malignant;Deep learning;MRI;THORACOLUMBAR SPINE;METASTASES	1	3	3	6	1	2	N/A	mAP and detection speed	N	P	R
	A multi-resolution approach for spinal metastasis detection using deep Siamese neural networks	10.1016/j.compbiomed.2017.03.024 WE - Science Citation Index Expanded (SCI-EXPANDED)	2017	Wang, J and Fang, ZY and Lang, N and Yuan, HS and Su, MY and Baldi, P	USA	Institute for Genomics and Bioinformatics and Department of Computer Science, University of California, Irvine, CA 92697, USA	6	4	Retrospective study	COMPUTERS IN BIOLOGY AND MEDICINE	Cervical spine;Magnetic resonance imaging;Deep learning-based reconstruction;Image quality;Diagnostic performance;SYSTEM	1	3	2	5	1	2	1 - 5	N/A	N	N	P
	Deep learning-based magnetic resonance imaging of the spine in the diagnosis and physiological evaluation of spinal metastases	10.1016/j.jbo.2023.100483	2023	Wang, DP and Sun, Y and Tang, X and Liu, CJ and Liu, RD	China	The Department of Traumatology, Affiliated Hospital of Guilin Medical University, Guilin 541001, China	5	3	Retrospective study	JOURNAL OF BONE ONCOLOGY	spinal cord injury (SCI);Magnetic Resonance Imaging (MRI);convolutional neural network (CNN);faster R-CNN;VGG-16;Resnet50	1	2	2	5	1	0	3 - 4 - 6	N/A	N	N	R
	Pioneering precision in lumbar spine MRI segmentation with advanced deep learning and data enhancement	10.1016/j.mlwa.2025.100635 WE - Emerging Sources Citation Index (ESCI)	2025	Ahmed, I and Hossain, MT and Nahid, MZI and Sanjid, KS and Junayed, MSS and Uddin, MM and Khan, MM	Bangladesh	Department of Electrical & Computer Engineering, North South University, Dhaka 1229, Bangladesh	7	3	Retrospective study	MACHINE LEARNING WITH APPLICATIONS	Deep learning;Siamese neural network;Multi-resolution analysis;Spinal metastasis;Magnetic resonance imaging;BONE METASTASIS;MANAGEMENT;ARCHITECTURES;SEGMENTATION;PREDICTION;DROPOUT	0	1	9	3	1	2	2 - 3 - 4 - 6 - 9	N/A	Y	N	R
	A deep learning model for detection of cervical spinal cord compression in MRI scans	10.1038/s41598-021-89848-3 WE - Science Citation Index Expanded (SCI-EXPANDED)	2021	Merali, Z and Wang, JZ and Badhiwala, JH and Witiw, CD and Wilson, JR and Fehlings, MG	Canada	Division of Neurosurgery, Department of Surgery, University of Toronto, Canada.	6	3	Retrospective study	SCIENTIFIC REPORTS	Spinal metastases;Tumor;Magnetic resonance imaging;Physiological -based deep learning;Convolutional neural network;RADIOMIC FEATURES;BONE METASTASES;IMPACT;TUMOR	0	2	9	1	1	1	1 - 4 - 5	Cohen's kappa (κ)	N	Y	R
	Deep learning reconstruction of zero-echo time sequences to improve visualization of osseous structures and associated pathologies in MRI of cervical spine	10.1186/s13244-025-01902-0 WE - Science Citation Index Expanded (SCI-EXPANDED)	2025	Kaniewska, M and Zecca, F and Oberm√ºller, C and Ensle, F and Deininger-Czermak, E and Lohezic, M and Guggenberger, R	Switzerland	University Hospital Zurich (USZ), Zurich, Switzerland	7	6	Retrospective study	INSIGHTS INTO IMAGING	Lumbar spine;Deep learning;Segmentation;Class imbalance;Medical image analysis;LOW-BACK-PAIN;NEURAL-NETWORKS;DISC	0	5	9	1	1	1	N/A	SNR (Signal-to-Noise Ratio), CNR (Contrast-to-Noise Ratio), Likert image quality score, Artifact score, ICC, Cohen’s Kappa.	N	N	R
	Deep learning reconstruction for the evaluation of neuroforaminal stenosis using 1.5T cervical spine MRI: comparison with 3T MRI without deep learning reconstruction	10.1007/s00234-022-03024-6	2022	Yasaka, K and Tanishima, T and Ohtake, Y and Tajima, T and Akai, H and Ohtomo, K and Abe, O and Kiryu, S	Japan	Department of Radiology, The University of Tokyo Hospital, Tokyo, Japan	8	5	Prospective study	NEURORADIOLOGY	SPONDYLOTIC MYELOPATHY;CLASSIFICATION;IDENTIFICATION;ALGORITHMS;SAFETY	2	5	1	1	1	3	N/A	Non-uniformity (NU), likert image quality scores, p-values and Cohen's weighted kappa	N	N	R
	Automatic classification of the vertebral endplate lesions in magnetic resonance imaging by deep learning model	10.3389/fsurg.2023.1172313 WE - Science Citation Index Expanded (SCI-EXPANDED)	2023	Bassani, T and Cina, A and Galbusera, F and Sconfienza, LM and Albano, D and Barcellona, F and Colombini, A and Luca, A and Brayda-Bruno, M	Italy	IRCCS Istituto Ortopedico Galeazzi, Milan, Italy	9	5	Retrospective study	FRONTIERS IN SURGERY	Magnetic resonance imaging;Zero-echo time;Deep learning reconstruction;CT-like MRI;Cervical spine;NECK;EPIDEMIOLOGY;RELIABILITY;POPULATION;SURGERY;PAIN;CT	1	2	9	4	1	2	1 - 3 - 4 - 5 - 6	N/A	N	N	R
	Automatic detection and voxel-wise mapping of lumbar spine Modic changes with deep learning	10.1002/jsp2.1204	2022	Gao, KT and Tibrewala, R and Hess, M and Bharadwaj, UU and Inamdar, G and Link, TM and Chin, CT and Pedoia, V and Majumdar, S	USA	Department of Radiology and Biomedical Imaging, University of California, San Francisco, San Francisco, California, USA	9	2	Retrospective study	JOR SPINE	Artificial intelligence;Deep learning;Magnetic resonance imaging;Cervical vertebrae;CONVOLUTIONAL NEURAL-NETWORK;CT	1	1	1	3	1	3	2 - 5	Cohen's kappa (κ), Pearson correlation coefficient (R) and p-values	N	N	R
	Deep learning reconstruction for lumbar spine MRI acceleration: a prospective study	10.1186/s41747-024-00470-0 WE - Emerging Sources Citation Index (ESCI)	2024	Tang, H and Hong, M and Yu, L and Song, Y and Cao, MQ and Xiang, L and Zhou, Y and Suo, ST	China	Department of Radiology, Renji Hospital, School of Medicine, Shanghai Jiao Tong University, China	8	4	Prospective study	EUROPEAN RADIOLOGY EXPERIMENTAL	spine;endplate lesions;osteochondrosis;artificial intelligence;deep learning;automatic classification;convolutional neural networks;DISC-DEGENERATION;ISSLS PRIZE;SCHEUERMANNS-DISEASE;STRONG-ASSOCIATION;LUMBAR SPINE;BACK-PAIN;PREVALENCE;DEFECT	1	5	1	3	0	3	N/A	Image quality evaluated using Likert scale scoring, signal-to-noise ratio (SNR), Cohen’s kappa (κ), ICC and p-values	N	N	R
	Deep Learning for Multi-Tissue Segmentation and Fully Automatic Personalized Biomechanical Models from BACPAC Clinical Lumbar Spine MRI	10.1093/pm/pnac142 WE - Science Citation Index Expanded (SCI-EXPANDED)	2023	Hess, M and Allaire, B and Gao, KT and Tibrewala, R and Inamdar, G and Bharadwaj, U and Chin, C and Pedoia, V and Bouxsein, M and Anderson, D and Majumdar, S	USA	Department of Radiology and Biomedical Imaging, Center for Intelligent Imaging, University of California, San Francisco, San Francisco, California	11	2	Retrospective study	PAIN MEDICINE	deep learning;magnetic resonance imaging;Modic changes;vertebral body;LOW-BACK-PAIN;CONVOLUTIONAL NEURAL-NETWORKS;VERTEBRAL END-PLATE;BONE-MARROW;SEGMENTATION;DISC;MR;QUANTIFICATION;CLASSIFICATION;ASSOCIATION	1	1	9	3	1	3	2 - 7	Pearson correlation coefficient (R)	N	N	R
	Automated Detection and Measurement of Dural Sack Cross-Sectional Area in Lumbar Spine MRI Using Deep Learning	10.3390/bioengineering10091072 WE - Science Citation Index Expanded (SCI-EXPANDED)	2023	Saravi, B and Zink, A and √úlk√ºmen, S and Couillard-Despres, S and Wollborn, J and Lang, GR and Hassel, F	Germany	Department of Orthopedics and Trauma Surgery, Medical Center—University of Freiburg, Faculty of Medicine, University of Freiburg, Freiburg, Germany;	7	5	Retrospective study	BIOENGINEERING-BASEL	Artificial intelligence;Deep learning;Low back pain;Lumbar vertebrae;Magnetic resonance imaging	0	1	9	3	1	3	3 - 4 - 6 - 7	Pearson correlation coefficient (R) and Bland-Altman analysis	P	Y	R
	Deep learning model for the automated detection and classification of central canal and neural foraminal stenosis upon cervical spine magnetic resonance imaging	10.1186/s12880-024-01489-w WE - Science Citation Index Expanded (SCI-EXPANDED)	2024	Zhang, EL and Yao, MY and Li, Y and Wang, QZ and Song, XH and Chen, YY and Liu, K and Zhao, WL and Xing, XY and Zhou, Y and Meng, FY and Ouyang, HQ and Chen, GW and Jiang, L and Lang, N and Jiang, SQ and Yuan, HS	China	Department of Radiology, Peking University Third Hospital, Beijing, China	17	3	Retrospective study	BMC MEDICAL IMAGING	Deep Learning;Magnetic Resonance Imaging;Musculoskeletal;Biomechanics;Quantitative Imaging;Lumbar Spine;Chronic Low Back Pain;BACPAC;LOW-BACK-PAIN;CROSS-SECTIONAL AREA;INTERVERTEBRAL DISC HEIGHT;PREVALENCE;COSTS	1	3	1	1	1	1	1 - 3 - 4 - 5 - 9	Recall rate for ROI localization, Cohen's kappa (κ), confidence intervals and diagnosis time	N	N	R
	A quantitative evaluation of the deep learning model of segmentation and measurement of cervical spine MRI in healthy adults	10.1002/acm2.14282	2024	Zhu, YF and Li, YS and Wang, KX and Li, JP and Zhang, XD and Zhang, YF and Li, JL and Wang, XY	China	Department of Radiology, Peking University First Hospital, Beijing, China	8	4	Retrospective study	JOURNAL OF APPLIED CLINICAL MEDICAL PHYSICS	lumbar spine MRI;dural sack cross-sectional area;deep learning;automated detection;spinal pathologies;image segmentation;spine surgery;quantitative measurement;clinical application	0	1	0	1	2	1	N/A	Quantitative measurements were reported as mean ± standard deviation (SD), and statistical analyses included Pearson correlation, Welch’s ANOVA, paired t-tests, and p-values	N	N	R
	Deep Learning Algorithm Trained on Cervical Magnetic Resonance Imaging to Predict Outcomes of Transforaminal Epidural Steroid Injection for Radicular Pain from Cervical Foraminal Stenosis	10.2147/JPR.S409841 WE - Science Citation Index Expanded (SCI-EXPANDED)	2023	Wang, MX and Kim, JK and Chang, MC	Republic of Korea	Yeungnam University, Gyeongsan-si, Republic of Korea	3	2	Retrospective study	JOURNAL OF PAIN RESEARCH	Deep learning;MRI;Cervical spinal stenosis;Convolutional neural network;LUMBAR SPINE;MYELOPATHY;MULTICENTER	1	4	1	1	1	0	1 - 3 - 4 - 6	Confidence intervals and confusion matrix analysis	N	N	C
	Differentiating Magnetic Resonance Images of Pyogenic Spondylitis and Spinal Modic Change Using a Convolutional Neural Network	10.1097/BRS.0000000000004532 WE - Science Citation Index Expanded (SCI-EXPANDED)	2022	Mukaihata, T and Maki, S and Eguchi, Y and Geundong, K and Shoda, J and Yokota, H and Orita, S and Shiga, Y and Inage, K and Furuya, T and Ohtori, S	Japan	Department of Orthopaedic Surgery, Graduate School of Medicine, Chiba University, Chiba, Japan	11	4	Retrospective study	SPINE	cervical spine;deep learning;magnetic resonance imaging;morphometrics	1	2	5	3	1	1	1 - 3 - 5	Receiver operating characteristics (ROC) analysis, confidence intervals, McNemar test and p-values	N	N	C
	MRI-based synthetic CT of the lumbar spine: Geometric measurements for surgery planning in comparison with CT	10.1016/j.ejrad.2021.109999	2021	Morb√©e, L and Chen, M and Herregods, N and Pullens, P and Jans, LBO	Belgium	Department of Radiology, Ghent University Hospital, Corneel Heymanslaan 10, 9000 Ghent, Belgium	5	2	Prospective study	EUROPEAN JOURNAL OF RADIOLOGY	convolutional neural network;artificial intelligence;deep learning;spinal stenosis;cervical spine;transforaminal epidural steroid injection;PULSED RADIOFREQUENCY;LUMBAR;SEVERITY	0	5	9	3	1	3	N/A	Agreement and equivalency evaluated using Bland-Altman analysis, equivalency statistical testing, ICC and p-values	N	N	R
	Automated Differentiation Between Osteoporotic Vertebral Fracture and Malignant Vertebral Fracture on MRI Using a Deep Convolutional Neural Network	10.1097/BRS.0000000000004307 WE - Science Citation Index Expanded (SCI-EXPANDED)	2021	Yoda, T and Maki, S and Furuya, T and Yokota, H and Matsumoto, K and Takaoka, H and Miyamoto, T and Okimatsu, S and Shiga, Y and Inage, K and Orita, S and Eguchi, Y and Yamashita, T and Masuda, Y and Uno, T and Ohtori, S	Japan	Department of Radiology, Chiba University Hospital, Chiba, Japan	16	5	Retrospective study	SPINE	artificial intelligence;neural networks;computer;deep learning;spondylitis;magnetic resonance imaging;VERTEBRAL END-PLATE;SIGNAL CHANGES;OSTEOMYELITIS;INFECTION;DIAGNOSIS;MARROW	1	2	3	5	1	1	1 - 3 - 5	Receiver operating characteristics (ROC) analysis, confidence intervals, Youden index, McNemar test and p-values	N	N	P
	Deep learning-based automated segmentation and quantification of the dural sac cross-sectional area in lumbar spine MRI	10.3389/fradi.2025.1503625 WE - Emerging Sources Citation Index (ESCI)	2025	Ghobrial, G and Roth, C	Germany	Clinic for Diagnostic and Interventional Radiology and Neuroradiology, Klinikum Bremerhaven Reinkenheide, Bremerhaven, Germany	2	2	Retrospective study	FRONTIERS IN RADIOLOGY	Lumbar spine;CT;MRI;Deep learning;ATTENUATION CORRECTION;PEDICLE;IMAGES	0	1	9	3	1	0	3 - 4 - 6 - 7	Pearson correlation coefficient (R), Bland-Altman analysis, limits of agreement, mean squared error (MSE) and ROC analysis	Y	N	R
	Cerebrospinal fluid flow artifact reduction with deep learning to optimize the evaluation of spinal canal stenosis on spine MRI	10.1007/s00256-023-04501-6	2024	Kim, UH and Kim, HJ and Seo, J and Chai, JW and Oh, J and Choi, YH and Kim, DH	Republic of Korea	AI Graduate School, Gwangju Institute of Science and Technology (GIST), Gwangju, Republic of Korea	7	4	Retrospective study	SKELETAL RADIOLOGY	artificial intelligence;deep convolutional neural network;deep learning;malignant vertebral compression fractures;osteoporotic vertebral fractures;spinal metastasis;COMPRESSION FRACTURES;MAGNETIC-RESONANCE;DISCRIMINATE BENIGN;SCORING SYSTEM;CLASSIFICATION	1	5	1	1	4	1	N/A	Weighted kappa, p-values, paired t-test, mean signal intensity (SI) and non-uniformity (NU)	N	N	R
	Diagnostic evaluation of deep learning accelerated lumbar spine MRI	10.1177/19714009231224428	2024	Awan, KM and Goncalves, ALM and Tabari, A and Applewhite, BP and Lang, M and Lo, WC and Sellers, R and Kollasch, P and Clifford, B and Nickel, D and Husseni, J and Rapalino, O and Schaefer, P and Cauley, S and Huang, SY and Conklin, J	USA	Department of Radiology, Athinoula A. Martinos Center for Biomedical Imaging, Massachusetts General Hospital, USA	16	6	Prospective study	NEURORADIOLOGY JOURNAL	deep learning;lumbar spine MRI;dural sac cross-sectional area (DSCA);medical image segmentation;MultiResUNet;automated diagnosis;spinal canal stenosis;radiological assessment;LOW-BACK-PAIN;STENOSIS;CLASSIFICATION	2	5	9	3	6	1	N/A	Quadratically weighted Cohen’s kappa, Wilcoxon signed-rank test, Z statistic, p-values, 95% confidence interval, and noninferiority margin	N	N	R
	Deep Learning Approaches for Lumbar Spine MRI Segmentation and Classification	10.18280/ts.420342 WE - Science Citation Index Expanded (SCI-EXPANDED)	2025	Laazab, K and Benblidia, N and Baaloul, A	Algeria	Signal Processing and Image Laboratory, University of Blida1, Blida, Algeria	3	2	Retrospective study	TRAITEMENT DU SIGNAL	Cerebrospinal fluid;Artifacts;Deep learning;Cycle generative adversarial network;Magnetic resonance imaging;CERVICAL-SPINE;IMAGE QUALITY;GRADIENT;APPEARANCE	0	0	9	3	1	2	3 - 4 - 6	N/A	Y	N	A
	Augmented prediction of vertebral collapse after osteoporotic vertebral compression fractures through parameter-efficient fine-tuning of biomedical foundation models	10.1038/s41598-024-82902-w WE - Science Citation Index Expanded (SCI-EXPANDED)	2024	Kim, S and Kim, I and Yuh, WT and Han, S and Kim, C and Ko, YS and Cho, W and Park, SB	Republic of Korea	School of Biomedical Engineering, Korea University, Seoul, Republic of Korea	8	14	Retrospective study	SCIENTIFIC REPORTS	Spine;magnetic resonance imaging;artificial intelligence;acceleration;LOW-BACK-PAIN	1	4	9	5	5	2	1 - 5	N/A	N	N	C
	Deep learning MRI halves scan time and preserves image quality across routine neuroradiologic examinations	10.1093/radadv/umaf029 WE - Emerging Sources Citation Index (ESCI)	2025	Lyo, SK and Mohan, S and Hoch, MJ and Patel, VP and Kurtz, RM and Hassankhani, A	USA	Department of Radiology, Hospital of the University of Pennsylvania, Philadelphia, United States	6	2	Retrospective study	RADIOLOGY ADVANCES	segment the lumbar spine;u-net;lordosis;Cobb method;classification of lumbar;detect lordosis;transfer learning;DIAGNOSIS;LORDOSIS	0	5	9	5	1	2	N/A	Scan time reduction (%), Likert image quality score, ICC	N	N	R
	Ultrafast lumbar spine MRI protocol using deep learning-based reconstruction: diagnostic equivalence to a conventional protocol	10.1007/s00256-022-04192-5	2022	Fujiwara, M and Kashiwagi, N and Matsuo, C and Watanabe, H and Kassai, Y and Nakamoto, A and Tomiyama, N	Japan	Department of Diagnostic Radiology, Osaka Medical and Pharmaceutical University, Osaka, Japan	7	6	Prospective study	SKELETAL RADIOLOGY	Compression fracture;Spine;Biomedical foundation model;Vision transformer;Parameter-efficient fine-tuning;DEEP-LEARNING-MODEL;BIAS	0	5	9	3	0	1	N/A	Linear weighted Cohen’s kappa, unweighted Cohen’s kappa, 95% confidence interval, interreader agreement rate, individual equivalence index	N	N	R
	Deep learning system for automated detection of posterior ligamentous complex injury in patients with thoracolumbar fracture on MRI	10.1038/s41598-023-46208-7 WE - Science Citation Index Expanded (SCI-EXPANDED)	2023	Jo, SW and Khil, EK and Lee, KY and Choi, I and Yoon, YS and Cha, JG and Lee, JH and Kim, H and Lee, SY	Republic of Korea	Department of Radiology, Hallym University Dongtan Sacred Heart Hospital, Hwaseong-si, Republic of Korea	9	6	Retrospective study	SCIENTIFIC REPORTS	deep learning MRI reconstruction;deep learning MRI;MRI reconstruction;MRI;neuroradiology;scan time reduction;image quality;hybrid imaging protocols	1	0	5	5	1	1	1 - 2 - 3 - 5 - 6	N/A	N	N	R
	Applicability of deep learning-based reconstruction trained by brain and knee 3T MRI to lumbar 1.5T MRI	10.1177/20584601211023939 WE - Emerging Sources Citation Index (ESCI)	2021	Kashiwagi, N and Tanaka, H and Yamashita, Y and Takahashi, H and Kassai, Y and Fujiwara, M and Tomiyama, N	Japan	Department of Future Diagnostic Radiology, Osaka University Graduate School of Medicine, Osaka, Japan	7	6	Prospective study	ACTA RADIOLOGICA OPEN	Lumbar spine;Magnetic resonance imaging;Fast imaging;Diagnostic performance;Deep learning;GRADING SYSTEM;EXPERIENCE	0	5	0	3	0	2	N/A	SNR, CNR, Wilcoxon q-values	N	N	R
	MRI-based 2.5D deep learning radiomics nomogram for the differentiation of benign versus malignant vertebral compression fractures	10.3389/fonc.2025.1603672 WE - Science Citation Index Expanded (SCI-EXPANDED)	2025	Liang, WH and Yu, H and Duan, LS and Li, XA and Wang, M and Wang, B and Cui, JL	China	Department of Radiology, Third Hospital of Hebei Medical University, Shijiazhuang, China	7	1	Retrospective study	FRONTIERS IN ONCOLOGY	VERTEBRAL FRACTURES;SPINE;CLASSIFICATION;MORPHOLOGY;INTEGRITY;SURGEON;TRAUMA	1	2	5	5	1	2	1 - 3 - 5	N/A	N	N	M
	The Success of Deep Learning Modalities in Evaluating Modic Changes	10.1016/j.WNEU.2024.01.129	2024	Y√ºksek, M and Yokus, A and Arslan, H and Canayaz, M and Akdemir, Z	Turkey	Department of Radiology, Van Training and Research Hospital, Van, Turkey	5	3	Retrospective study	WORLD NEUROSURGERY	Deep learning;denoise;lumbar spine;magnetic resonance imaging;fast scan;IMAGES	0	0	9	3	1	2	2 - 3 - 4 - 6 - 9	Cohen's kappa	N	N	R
	Artificial Intelligence Comparison of the Radiologist Report With Endoscopic Predictors of Successful Transforaminal Decompression for Painful Conditions of the Lumber Spine: Application of Deep Learning Algorithm Interpretation of Routine Lumbar Magnetic Resonance Imaging Scan	10.14444/7130 WE - Emerging Sources Citation Index (ESCI)	2020	Lewandrowski, KU and Muraleedharan, N and Eddy, SA and Sobti, V and Reece, BD and Le√≥n, JFR and Shah, S	USA	Staff Orthopaedic Spine Surgeon Center for Advanced Spine Care of Southern Arizona and Surgical Institute of Tucson, Tucson, Arizona, USA	7	7	Retrospective study	INTERNATIONAL JOURNAL OF SPINE SURGERY	radiomics;2.5D deep learning;feature fusion;vertebral compression fractures;nomogram;magnetic resonance imaging	0	4	9	3	0	2	1 – 5	Cohen’s kappa, odds ratio, Wald statistic, Hosmer–Lemeshow test	N	N	R
	Compare three deep learning-based artificial intelligence models for classification of calcified lumbar disc herniation: a multicenter diagnostic study	10.3389/fsurg.2024.1458569 WE - Science Citation Index Expanded (SCI-EXPANDED)	2024	Liu, ZM and Zhang, H and Zhang, M and Qu, CP and Li, L and Sun, YH and Ma, XX	China	Department of Spine Surgery, The Affiliated Hospital of Qingdao University, Qingdao, Shandong, China	7	2	Retrospective study	FRONTIERS IN SURGERY	Artificial intelligence;Convolutional neural networks;Deep learning;Modic changes;VERTEBRAL END-PLATE	1	2	1	3	1	3	1 - 3 - 4 - 5 - 6	PPV, NPV	N	N	M
	SSCK-Net: Spine segmentation in MRI based on cross attention and key-points recognition-assisted learner	10.1016/j.bspc.2023.105278	2023	Li, HY and Wang, ZX and Shen, W and Li, HL and Li, HS and Yu, PF	China	School of Information, Yunnan University, Kunming 650504, China	6	3	Retrospective study	BIOMEDICAL SIGNAL PROCESSING AND CONTROL	artificial intelligence;deep neural network learning;magnetic resonance imaging;herniated disc;endoscopic decompression;EXTRAFORAMINAL DISC HERNIATION;EPIDURAL STEROID INJECTION;MRI GRADING SYSTEM;INTERVERTEBRAL DISC;DISKECTOMY;CLASSIFICATION;STENOSIS;SCIATICA	0	1	9	3	6	2	2 - 3 - 6 - 9	N/A	P	N	R
	Intervertebral Cervical Disc Intensity (IVCDI) Detection and Classification on MRI Scans Using Deep Learning Methods	10.1002/ima.23174 WE - Science Citation Index Expanded (SCI-EXPANDED)	2024	Erkoc, MF and Ulutas, H and Sahin, ME	Turkey	Department of Radiology, Yozgat Bozok University, Yozgat, Turkey	3	2	Retrospective study	INTERNATIONAL JOURNAL OF IMAGING SYSTEMS AND TECHNOLOGY	calcifed lumbar disc herniation;deep learning;artificial intelligence;MRI;ResNet34;NEURAL-NETWORKS;CT SCANS;PATHOGENICITY;DISKECTOMY;RISKS	1	0	1	1	1	2	3 - 4 - 6 - 9	mAP	N	N	R
	Spinal Stenosis Grading in Magnetic Resonance Imaging Using Deep Convolutional Neural Networks	10.1097/BRS.0000000000003377 WE - Science Citation Index Expanded (SCI-EXPANDED)	2020	Won, D and Lee, HJ and Lee, SJ and Park, SH	Republic of Korea	Department of Robotics Engineering, Daegu Gyeongbuk Institute of Science and Technology, Daegu, Korea	4	3	Retrospective study	SPINE	Spine segmentation;Deep learning;Cross attention;Key-points recognition	1	0	1	3	1	3	3 - 4	statistical significance (p-values) - mIOU (mean Intersection of Union)	N	N	R
	Differentiation between spinal multiple myeloma and metastases originated from lung using multi‑view attention‑guided network	10.3389/fonc.2022.981769 WE - Science Citation Index Expanded (SCI-EXPANDED)	2022	Chen, KL and Cao, JS and Zhang, X and Wang, X and Zhao, XY and Li, QC and Chen, S and Wang, P and Liu, TL and Du, J and Liu, SY and Zhang, LC	China	Department of Hematology, Myeloma & Lymphoma Center, Shanghai Changzheng Hospital,Changzheng Hospital of the Naval Medical University, Huangpu, China	12	5	Retrospective study	FRONTIERS IN ONCOLOGY	classification;intervertebral cervical disc;Mask R-CNN;MRI;segmentation;DEGENERATION;DIAGNOSIS;SPINE;CT	1	2	2	5	9	3	1 - 3 - 4	N/A	N	N	P
	An approach to the diagnosis of lumbar disc herniation using deep learning models	10.3389/fbioe.2023.1247112 WE - Science Citation Index Expanded (SCI-EXPANDED)	2023	Prisilla, AA and Guo, YL and Jan, YK and Lin, CY and Lin, FY and Liau, B and Tsai, JY and Ardhianto, P and Pusparani, Y and Lung, CW	Indonesia	Department of Fashion Design, LaSalle College Jakarta, Jakarta, Indonesia & Department of Digital Media Design, Asia University, Taichung, Taiwan	10	12	Retrospective study	FRONTIERS IN BIOENGINEERING AND BIOTECHNOLOGY	deep convolutional neural networks;grading;lumbar;spinal stenosis;CLASSIFICATION;AREA	1	3	1	3	1	2	3 - 4 - 6	AP (Average Precision) - mAP	N	N	R
	Conversion of T2-Weighted Magnetic Resonance Images of Cervical Spine Trauma to Short T1 Inversion Recovery (STIR) Images by Generative Adversarial Network	10.7759/cureus.60381 WE - Emerging Sources Citation Index (ESCI)	2024	Yunde, A and Maki, S and Furuya, T and Okimatsu, S and Inoue, T and Miura, M and Shiratani, Y and Nagashima, Y and Maruyama, J and Shiga, Y and Inage, K and Eguchi, Y and Orita, S and Ohtori, S	Japan	Department of Orthopaedic Surgery, Chiba University, Graduate School of Medicine, Chiba, JPN.	14	1	Retrospective study	CUREUS JOURNAL OF MEDICAL SCIENCE	multiple myeloma (MM);spinal metastases;lung cancer;deep learning;attention guidance strategy;radiomics;BONE METASTASES;UNKNOWN ORIGIN;MANAGEMENT;DIAGNOSIS	1	8	3	1	4	1	5	PSNR - SSIM	N	N	R
	Deep learning model for automated diagnosis of degenerative cervical spondylosis and altered spinal cord signal on MRI	10.1016/j.spinee.2024.09.015	2025	Lee, A and Wu, JR and Liu, CS and Makmur, A and Ting, YH and Nor, FEM and Tan, LY and Ong, W and Tan, WC and Lee, YJ and Huang, JC and Beh, JCY and Lim, DSW and Low, XZ and Teo, EC and Chan, YH and Lim, JI and Lin, SX and Tan, JH and Kumar, N and Ooi, BC and Quek, ST and Hallinan, JTPD	Singapore	Department of Diagnostic Imaging, National University Hospital, 5 Lower Kent Ridge Rd 119074, Singapore.	23	8	Retrospective study	SPINE JOURNAL	augmentation;automatic detection;low back pain;MRI;YOLO models;SPINAL STENOSIS;SEGMENTATION	1	0	1	1	6	1	5 - 6 - 9	Gwet’s Kappa (agreement statistic)	N	Y	R
	Using deep learning to enhance reporting efficiency and accuracy in degenerative cervical spine MRI	10.1016/j.spinee.2025.03.009 WE - Science Citation Index Expanded (SCI-EXPANDED)	2025	Lee, A and Wu, JR and Liu, CS and Makmur, A and Ting, YH and Lee, S and Chan, MDZ and Lim, DSW and Khoo, VMH and Sng, J and Ong, HY and Tan, A and Ge, SL and Muhamat, FE and Lim, YT and Beh, JCY and Yap, QV and Tan, JH and Kumar, N and Ooi, BC and Hallinan, JTPD	Singapore	Department of Diagnostic Imaging, National University Hospital, 5 Lower Kent Ridge Rd, 119074, Singapore	21	6	Retrospective study	SPINE JOURNAL	t2-weighted magnetic resonance images;short t1 inversion recovery;image conversion;generated adversarial network;deep learning;cervical spine trauma;magnetic resonance imaging;INJURY;MRI;CLASSIFICATION;EFFICACY	1	2	1	1	6	1	1 - 5	Gwet’s Kappa (interobserver agreement) - Interpretation Time (seconds) - Cohen’s d (effect size, sample size calculation)	N	N	R
	Deep learning-based k-space-to-image reconstruction and super resolution for diffusion-weighted imaging in whole-spine MRI	10.1016/j.mri.2023.11.003	2024	Kim, DK and Lee, SY and Lee, J and Huh, YJ and Lee, S and Lee, S and Jung, JY and Lee, HS and Benkert, T and Park, SH	Republic of Korea	Department of Radiology, Seoul St. Mary's Hospital, College of Medicine, The Catholic University of Korea, Seoul, Republic of Korea.	10	5	Retrospective study	MAGNETIC RESONANCE IMAGING	Convolutional neural networks;Deep learning;Degenerative cervical spondylosis;MRI;Neural foramina;Spinal canal;Spinal cord;OBSERVER AGREEMENT;GRADING SYSTEM;CLASSIFICATION;MYELOPATHY;STENOSIS	1	5	2	5	0	3	N/A	Quantitative image quality metrics (SNR, CNR, Lesion contrast, Nonuniformity (NU), Mean ADC values) - Agreement statistics (Cohen’s kappa (lesion detection agreement), Weighted Cohen’s kappa (qualitative Likert scores) - Statistical testing (McNemar test, Wilcoxon signed-rank test, Bonferroni correction)	N	N	R
	EPISeg: Automated segmentation of the spinal cord on echo planar images using open-access multi-center data	10.1162/IMAG.a.98 WE - Emerging Sources Citation Index (ESCI)	2025	Banerjee, R and Kaptan, M and Tinnermann, A and Khatibi, A and Dabbagh, A and B√ºchel, C and K√ºndig, CW and Law, CSW and Pfyffer, D and Lythgoe, DJ and Tsivaka, D and van de Ville, D and Eippert, F and Muhammad, F and Glover, GH and David, G and Haynes, G and Haaker, J and Brooks, JCW and Finsterbusch, J and Martucci, KT and Hemmerling, KJ and Mobarak-Abadi, M and Hoggarth, MA and Howard, MA and…	Canada	Department of Computer Science, Polytechnique Montreal, Montreal, Quebec, Canada + Mila—Quebec AI Institute, Montreal, Quebec, Canada + NeuroPoly Lab, Institute of Biomedical Engineering, Polytechnique Montreal, Montreal, Quebec, Canada	46	39	Retrospective study	IMAGING NEUROSCIENCE	MRI;Cervical spine;Artificial intelligence;Deep learning;Computer aided detection;RADICULOPATHY;RELIABILITY;MYELOPATHY;DIAGNOSIS;STENOSIS	1	1	0	6	2	2	2	HD95 - Visual assessment / qualitative verification	Y	Y	R
	Deep learning for automated, interpretable classification of lumbar spinal stenosis and facet arthropathy from axial MRI	10.1007/s00330-023-09483-6	2023	Bharadwaj, UU and Christine, M and Li, SV and Chou, D and Pedoia, V and Link, TM and Chin, CT and Majumdar, S	USA	Department of Radiology and Biomedical Imaging, University of California San Francisco, 185 Berry Street, Suite 350, San Francisco, CA, 94107, USA. upasana.bharadwaj@ucsf.edu.	8	3	Retrospective study	EUROPEAN RADIOLOGY	Deep learning;Whole spine;Diffusion-weighted imaging;Echo planar imaging;Image reconstruction;ARTIFACTS;CONTRAST	1	0	1	3	1	1	1 - 2 - 3 - 7 - 9	Cohen’s kappa	N	N	R
	SEGMENTATION OF SPINAL SUBARACHNOID LUMEN WITH 3D ATTENTION U-NET	10.1142/S0219519423400110	2023	Keles, A and Algin, O and Ozisik, PA and Sen, B and Celebi, FV	Turkey	Department of Computer Engineering, Graduate School of Natural Sciences, Ankara Yildirim Beyazit University, Ankara, Turkey	5	6	Retrospective study	JOURNAL OF MECHANICS IN MEDICINE AND BIOLOGY	spinal cord;echo planar imaging;functional magnetic resonance imaging;segmentation;FUNCTIONAL CONNECTIVITY;THERMAL-STIMULATION;FMRI;NOISE	0	1	4	2	2	2	1 - 2 - 3 - 4 - 5 - 6	Correlation Coefficient r - ICC	N	N	R
	Differentiation of tuberculous and brucellar spondylitis using conventional MRI-based deep learning algorithms	10.1016/j.ejrad.2024.111655	2024	Chen, JM and Guo, XW and Liu, XM and Sheng, YR and Li, FY and Li, HX and Cui, Y and Wang, HZ and Wei, LZ and Li, ML and Liu, JH and Zeng, QS	China	Department of Radiology, Shandong Provincial Qianfoshan Hospital, Shandong University, Jinan, Shandong, China.	12	9	Retrospective study	EUROPEAN JOURNAL OF RADIOLOGY	Deep learning;MRI;Stenosis;Arthropathy;AGREEMENT;DIAGNOSIS;IMAGES	0	2	5	5	1	3	1 - 3 - 4 - 5	N/A	N	N	C
	Attention-gated U-Net networks for simultaneous axial/sagittal planes segmentation of injured spinal cords	10.1002/acm2.14123	2023	Masse-Gignac, N and Fl√≥rez-Jim√©nez, S and Mac-Thiong, JM and Duong, L	Canada	Department of software and IT engineering, École de technologie supérieure, Montreal, Canada & Department of orthopedic surgery, Hopital Sacré-Coeur, Montréal, Canada	4	2	Retrospective study	JOURNAL OF APPLIED CLINICAL MEDICAL PHYSICS	Phase contrast magnetic resonance imaging;deep learning;pulsatile flow;CSF;spinal;idiopathic scoliosis;CEREBROSPINAL-FLUID FLOW;PHASE-CONTRAST MRI;ADOLESCENT IDIOPATHIC SCOLIOSIS;CSF FLOW;CEREBRAL AQUEDUCT;IMAGE;HYDROCEPHALUS;NETWORKS;BRACE	1	1	3	6	9	2	2	TPR - MSD - Hausdorff Distance	N	N	R
	SCIseg: Automatic Segmentation of Intramedullary Lesions in Spinal Cord Injury on T2-weighted MRI Scans	10.1148/ryai.240005 WE - Emerging Sources Citation Index (ESCI)	2025	Karthik, EN and Valosek, J and Smith, AC and Pfyffer, D and Schading-Sassenhausen, S and Farner, L and Weber, KA II and Freund, P and Cohen-Adad, J	Canada & Czech Republic (2 first authors)	NeuroPoly Laboratory, Institute of Biomedical Engineering, Polytechnique Montréal, 2500 Chemin de Polytechnique, Montréal, Québec, Canada H3T 1J4 (E.N.K., J.V.); Mila-Quebec AI Institute, Montréal, Québec, Canada (E.N.K., J.V.); Department of Neurosurgery and Department of Neurology, Faculty of Medicine and Dentistry, Palacký University Olomouc, Olomouc, Czechia (J.V.)	9	8	Retrospective study	RADIOLOGY-ARTIFICIAL INTELLIGENCE	Deep learning;Tuberculous spondylitis;Brucellar spondylitis;Magnetic resonance imaging;Differential diagnosis;SPINAL TUBERCULOSIS;MODEL	1	1	3	6	1	2	2 - 4 - 5 - 6	ASD - RVE	N	N	R
	5-Year progression prediction of endplate defects: Utilizing the EDPP-Flow convolutional neural network based on unbalanced data	10.1016/j.jor.2023.03.001	2023	Cheung, JPY and Kuang, XH and Zhang, T and Wang, K and Yang, C	China	Department of Orthopaedics and Traumatology, The University of Hong Kong, Hong Kong SAR, China & Digital Health Laboratory, School of Clinical Medicine, The University of Hong Kong, Hong Kong SAR, China.	5	4	Retrospective longitudonal cohort study	JOURNAL OF ORTHOPAEDICS	convolutional neural networks (CNN);deep learning;medical image segmentation;spinal cord;ROBUST	1	4	1	3	1	2	3 - 5 - 6	NPV	N	N	R
	Spine Computed Tomography to Magnetic Resonance Image Synthesis Using Generative Adversarial Networks : A Preliminary Study	10.3340/jkns.2019.0084 WE - Science Citation Index Expanded (SCI-EXPANDED)	2020	Lee, JH and Han, IH and Kim, DH and Yu, S and Lee, IS and Song, YS and Joo, S and Jin, CB and Kim, H	Republic of Korea	Department of Neurosurgery, Pusan National University Hospital, Busan, Korea.	9	4	Retrospective study	JOURNAL OF KOREAN NEUROSURGICAL SOCIETY	Spinal Cord;Trauma;Segmentation;MR Imaging;Supervised Learning;Convolutional Neural Network (CNN);OUTCOMES	0	8	0	3	4	1	7	PSNR	N	N	A
	Multi-muscle deep learning segmentation to automate the quantification of muscle fat infiltration in cervical spine conditions	10.1038/s41598-021-95972-x WE - Science Citation Index Expanded (SCI-EXPANDED)	2021	Weber, KA II and Abbott, R and Bojilov, V and Smith, AC and Wasielewski, M and Hastie, TJ and Parrish, TB and Mackey, S and Elliott, JM	USA	Division of Pain Medicine, Department of Anesthesiology, Perioperative and Pain Medicine, Stanford University School of Medicine, Palo Alto, CA, USA. kenweber@stanford.edu.	9	8	Retrospective study	SCIENTIFIC REPORTS	Lumbar disc degeneration;Disease progression prediction;Deep learning;Convolutional neural network;Unbalanced data;HIGH-INTENSITY ZONE;INTERVERTEBRAL DISC DEGENERATION;LOW-BACK-PAIN;LUMBAR SPINE;ASSOCIATION;DISCOGRAPHY;MR;CLASSIFICATION;TEARS	1	1	9	1	1	0	2 - 6 - 9	conformity coefficient - true positive rate - true negative rate - volume ratio (VR) measures	N	N	R
	Comparing image normalization techniques in an end-to-end model for automated modic changes classification from MRI images	10.1016/j.bas.2023.102738	2024	Cina, A and Haschtmann, D and Damopoulos, D and Gerber, N and Loibl, M and Fekete, T and Kleinst√ºck, F and Galbusera, F	Switzerland	ETH Zürich, Department of Health Sciences and Technologies, Zürich, Switzerland & Schulthess Klinik, Department of Teaching, Research and Development, Zürich, Switzerland	8	5	Retrospective study	BRAIN AND SPINE	Deep learning;Lumbar vertebrae;Magnetic resonance imaging;Computed tomography;ARTIFICIAL-INTELLIGENCE	0	0	1	3	9	2	3 - 4 - 5 - 9	balanced score - confidence score	N	N	R
	Automatic semantic segmentation of the lumbar spine: Clinical applicability in a multi-parametric and multi-center study on magnetic resonance images	10.1016/j.artmed.2023.102559	2023	S√°enz-Gamboa, JJ and Domenech, J and Alonso-Manjarr√©s, A and G√≥mez, JA and Iglesia-Vay√°, MD	Spain	FISABIO-CIPF Joint Research Unit in Biomedical Imaging, Fundaciò per al Foment de la Investigaciò Sanitària i Biomèdica (FISABIO), Av. de Catalunya 21, 46020 València, Spain. Electronic address: jsaenz@laberit.com.	5	5	Retrospective study	ARTIFICIAL INTELLIGENCE IN MEDICINE	GLOBAL BURDEN;AGE	1	1	9	3	9	2	3 - 4 - 5 - 9	confidence score	P	N	R
	Automated Pathogenesis-Based Diagnosis of Lumbar Neural Foraminal Stenosis via Deep Multiscale Multitask Learning	10.1007/s12021-018-9365-1 WE - Science Citation Index Expanded (SCI-EXPANDED)	2018	Han, ZY and Wei, BZ and Leung, S and Ben Nachum, I and Laidley, D and Li, S	China	College of Science and Technology, Shandong University of Traditional Chinese Medicine, Jinan, 250355, China & Computational Medicine Lab, Shandong University of Traditional Chinese Medicine, Jinan, 250355, China & Department of Medical Imaging, Western University, London, N6A 4V2, Canada & Digital Image Group (DIG), London, ON, N6A 4V2, Canada	6	8	Retrospective study	NEUROINFORMATICS	Modic changes;MRI images;Deep learning;Automatic classification;Detection;LUMBAR SPINE;MARROW;FEATURES	1	0	1	3	1	2	6	mAP (mAP07, mAP12) - Precision–Recall curve	N	N	R
	Automated Cervical Spinal Cord Segmentation in Real-World MRI of Multiple Sclerosis Patients by Optimized Hybrid Residual Attention-Aware Convolutional Neural Networks	10.1007/s10278-022-00637-4	2022	Bueno, A and Bosch, I and Rodr√≠guez, A and Jim√©nez, A and Carreres, J and Fern√°ndez, M and Marti-Bonmati, L and Alberich-Bayarri, A	Spain	Instituto de Tecnologías y Aplicaciones Multimedia, Universitat Politècnica de Valencia, Valencia, Spain. bgomez.america@gmail.com.	8	6	Retrospective study	JOURNAL OF DIGITAL IMAGING	Magnetic resonance images;Spine;Semantic image segmentation;Convolutional neural networks;Deep learning;Ensembles of classifiers;CORD;ACCURATE;ROBUST;OPTIMIZATION;REGISTRATION;MRI	1	1	5	1	1	2	2	MCC	N	N	R
	SoftSeg: Advantages of soft versus binary training for image segmentation	10.1016/j.media.2021.102038	2021	Gros, C and Lemay, A and Cohen-Adad, J	Canada	NeuroPoly Lab, Institute of Biomedical Engineering, Polytechnique Montreal, Montreal, QC, Canada	3	3	Retrospective technical validation	MEDICAL IMAGE ANALYSIS	Neural foraminal stenosis;Multiscale learning;Multitask learning;Deep learning;MRI GRADING SYSTEM;INTERVERTEBRAL FORAMEN;PARALLEL FRAMEWORK;VERTEBRA DETECTION;SEGMENTATION;CT;IMAGES;FEATURES;DISCS;PIXEL	1 - 2	1	9	6	1	2	2 - 6 - 7	absolute volume difference - relative volume difference	Y	Y	R
	Convolutional Neural Network-Based Automated Segmentation of the Spinal Cord and Contusion Injury: Deep Learning Biomarker Correlates of Motor Impairment in Acute Spinal Cord Injury	10.3174/ajnr.A6020 WE - Science Citation Index Expanded (SCI-EXPANDED)	2019	Mccoy, DB and Dupont, SM and Gros, C and Cohen-Adad, J and Huie, RJ and Ferguson, A and Duong-Fernandez, X and Thomas, LH and Singh, and Narvid, J and Pascual, L and Kyritsis, N and Beattie, MS and Bresnahan, JC and Dhall, S and Whetstone, W and Talbott, JF and TRACK-SCI Investigators	USA	From the Departments of Radiology and Biomedical Imaging & Brain and Spinal Injury Center	18	7	Retrospective study	AMERICAN JOURNAL OF NEURORADIOLOGY	Segmentation;MRI;Multiple sclerosis;Deep learning;Residual attention-aware;CNN;DISABILITY;ATROPHY;TOOL	1	1	3	6	1	2	2	Lesion volume - Relative difference in segmentation: lesion vs normal-appearing SC - Standard error - Segmentation time per patient - Linear mixed-effects model p-values	N	N	R
	Automatic generation of diffusion tensor imaging for the lumbar nerve using convolutional neural networks	10.1016/j.mri.2024.110237	2024	Masumoto, R and Eguchi, Y and Takeuchi, H and Inage, K and Narita, M and Shiga, Y and Inoue, M and Toshi, N and Tokeshi, S and Okuyama, K and Ohyama, S and Suzuki, N and Maki, S and Furuya, T and Ohtori, S and Orita, S	Japan	Department of Medical Engineering, Faculty of Engineering, Chiba University, 1-33 Yayoi-cho, Inage-ku, Chiba 263-8522, Japan. Electronic address: 20t0801b@student.gs.chiba-u.jp.	16	8	Retrospective study	MAGNETIC RESONANCE IMAGING	Segmentation;Deep Learning;Soft training;Partial Volume Effect;Label Smoothing;Soft mask;PARTIAL VOLUME SEGMENTATION;SPINAL-CORD;UNCERTAINTY ESTIMATION;NEURAL-NETWORKS;DEEP;FRAMEWORK;ALGORITHM;STAPLE	0	1	1	3	1	2	2	Tractography creation time	N	N	R
	Region of interest-specific loss functions improve T2 quantification with ultrafast T2 mapping MRI sequences in knee, hip and lumbar spine	10.1038/s41598-022-26266-z WE - Science Citation Index Expanded (SCI-EXPANDED)	2022	Tolpadi, AA and Han, MS and Caliv√†, F and Pedoia, V and Majumdar, S	USA	Department of Radiology and Biomedical Imaging, University of California, 1700, 4th Street, San Francisco, CA, 94158, USA. Aniket.Tolpadi@ucsf.edu.	5	2	Retrospective study	SCIENTIFIC REPORTS	CLINICAL-PRACTICE GUIDELINE;MRI;RECOMMENDATIONS;MANAGEMENT;OUTCOMES;IMPACT;ROBUST;DTI;MT	1	5	1	3	1	2	8	Pearson’s correlation coefficient r - Bland–Altman analysis - ICC - GLCM-based texture metrics	N	N	M
	Enhancing Lesion Detection in Inflammatory Myelopathies: A Deep Learning?Reconstructed Double Inversion Recovery MRI Approach	10.3174/ajnr.A8582	2025	Fang, Q and Yang, Q and Wang, B and Wen, B and Xu, GR and He, JZ	China	From the Department of Radiology (Q.F., Q.Y., B. Wang, J.H.), Qilu Hospital of Shandong University, Jinan, Shandong Province, China.	6	3	Prospective study	AMERICAN JOURNAL OF NEURORADIOLOGY	Segmentation;Deep learning;Diffusion tensor imaging;Lumbar nerve;Lumbar;Lumbar spinal stenosis;Lumbar disc herniation;WATER DIFFUSION;SPINAL-CORD;MRI;VISUALIZATION;DEGENERATION	1	5	5	6	1	2	N/A	ICC - Kendall’s tau (τ) - Kendall’s W - Fleiss’ kappa - Kolmogorov–Smirnov test	N	N	R
	Time-Dependent Deep Learning Prediction of Multiple Sclerosis Disability	10.1007/s10278-024-01031-y	2024	Mayfield, JD and Murtagh, R and Ciotti, J and Robertson, D and Naqa, IE	USA	USF Health Department of Radiology, 2 Tampa General Circle, STC 6103, Tampa, FL, 33612, USA. jdmayfield@usf.edu.	5	6	Retrospective study	JOURNAL OF IMAGING INFORMATICS IN MEDICINE	AUGMENTED NEURAL-NETWORK;T2 RELAXATION-TIMES;CORRELATION-COEFFICIENTS;ARTICULAR-CARTILAGE;DISC DEGENERATION;IN-VIVO;RECONSTRUCTION;ACQUISITION;PROGRESSION;DIAGNOSIS	0	4	5	1	6	2	1 - 4 - 5 - 6	N/A	N	N	C
	Lumbar intervertebral disc characterization through quantitative MRI analysis: An automatic voxel-based relaxometry approach	10.1002/mrm.28210	2020	Iriondo, C and Pedoia, V and Majumdar, S	USA	Department of Radiology and Biomedical Imaging, University of California, San Francisco, California & University of California, San Francisco, and University of California, Berkeley, Joint Graduate Group in Bioengineering, California	3	2	Retrospective study	MAGNETIC RESONANCE IN MEDICINE	CERVICAL-SPINAL CORD;MULTIPLE-SCLEROSIS;SEQUENCE;FLUID	1	1	1	3	1	0	2 - 3 - 5 - 6	Pearson correlation - paired t-test - Bland–Altman analysis - mean surface distance	N	N	R
	Deep learning-based high-accuracy detection for lumbar and cervical degenerative disease on T2-weighted MR images	10.1007/s00586-023-07641-4	2023	Yi, W and Zhao, JW and Tang, W and Yin, HK and Yu, LF and Wang, YH and Tian, W	China	Department of Spine Surgery, Beijing Jishuitan Hospital, Beijing, 100035, China. dr_weiyi@163.com.	7	6	Retrospective study	EUROPEAN SPINE JOURNAL	Artificial intelligence;Medical imaging;Multiple sclerosis;Time-dependent deep learning;Video transformers;ARTIFICIAL-INTELLIGENCE;CLINICAL DISABILITY;MRI	1	3	1	1 - 3	6	0	1 - 4 - 6	N/A	N	N	R
	Evaluation of a deep learning segmentation tool to help detect spinal cord lesions from combined T2 and STIR acquisitions in people with multiple sclerosis	10.1007/s00330-025-11541-0	2025	Lod√©, B and Hussein, BR and Meur√©e, C and Walsh, R and Gaubert, M and Lassalle, N and Courbon, G and Martin, A and Le Bars, J and Durand-Dubief, F and Bourre, B and Maarouf, A and Outteryck, O and Mehier, C and Poulin, A and Cathelineau, C and Hong, J and Criton, G and Motillon-Alonso, S and Lecler, A and Charbonneau, F and Duron, L and Bani-Sadr, A and Delpierre, C and Ferr√©, JC and Edan, G a…	France	Department of Neuroradiology, Rennes University Hospital, Rennes, France & EMPENN Research Team, IRISA, CNRS‑INSERM‑INRIA, Rennes University, Rennes, France	31	20	Retrospective study	EUROPEAN RADIOLOGY	deep learning;registration;relaxometry;segmentation;spine;LOW-BACK-PAIN;CARTILAGE T-1-RHO;RELAXATION-TIMES;WATER-CONTENT;DEGENERATION;T2;PROTEOGLYCAN;SEGMENTATION;T-2;LOCALIZATION	1	3	5	6	1	1	3 - 5 - 6	Light’s kappa - Task duration / reading time	N	N	R
	Deep learning-based high-accuracy quantitation for lumbar intervertebral disc degeneration from MRI	10.1038/s41467-022-28387-5 WE - Science Citation Index Expanded (SCI-EXPANDED)	2022	Zheng, HD and Sun, YL and Kong, DW and Yin, MC and Chen, J and Lin, YP and Ma, XF and Wang, HS and Yuan, GJ and Yao, M and Cui, XJ and Tian, YZ and Wang, YJ	China	School of Automation and Mechanical Engineering, Shanghai University, Shanghai, 200072, China & Shanghai Key Laboratory of Intelligent Manufacturing and Robotics, Shanghai, 200072, China & Longhua Hospital, Shanghai University of TCM, Shanghai, 200032, China & Spine Research Institute, Shanghai Academy of TCM, Shanghai, 200032, China & Key Laboratory of the Ministry of Education of Chronic Muscul…	13	13	Retrospective study	NATURE COMMUNICATIONS	Deep learning;Degenerative disc disease;Magnet resonance imaging;Spine	1	0	1	3	6	3	2 - 9	ICC - Kendall τ	N	N	R
https://www.scopus.com/inward/record.uri?eid=2-s2.0-85218196793&doi=10.1186%2Fs12938-025-01341-4&partnerID=40&md5=c64640cd5589d4701e6d97a1d04a6212	WDRIV-Net: a weighted ensemble transfer learning to improve automatic type stratification of lumbar intervertebral disc bulge, prolapse, and herniation	10.1186/s12938-025-01341-4	2025	Nakamoto, I. and Chen, H. and Wang, R. and Guo, Y. and Chen, W. and Feng, J. and Wu, J.	China	School of Internet Economics and Business, Fujian University of Technology, Fuzhou, China & Department of Radiology, Pingtan Comprehensive Experimentation Area Hospital, Pingtan, China & 3Department of Radiology, Fujian Medical University Union Hospital, Fuzhou, China	7	7	Retrospective study	BioMedical Engineering Online	CLASSIFICATION;HEIGHT;SPINE	1 - 2	2	1	3	9	2	1 - 3 - 4 - 5 - 6	N/A	N	N	R
https://www.scopus.com/inward/record.uri?eid=2-s2.0-105010445636&doi=10.1186%2Fs12938-025-01404-6&partnerID=40&md5=5a4c7b04066fa0ca266f9d60c261ac96	Development of a deep learning-based MRI diagnostic model for human Brucella spondylitis	10.1186/s12938-025-01404-6	2025	Wang, B. and Wei, J. and Wang, Z. and Niu, P. and Yang, L. and Hu, Y. and Shao, D. and Zhao, W.	China	Ningxia Institute of Clinical Medicine, The Third Clinical Medicine College, People's Hospital of Ningxia Hui Autonomous Region, Ningxia Medical University, Zhengyuan Street 301, Yinchuan, 750002, China.	8	5	Retrospective study	BioMedical Engineering Online	Mamba;Multimodal imaging;Spine segmentation;State-space model (SSM);Deep learning;Diagnosis;Feature extraction;Image segmentation;Learning systems;Medical image processing;State space methods;Clinical diagnosis;Features fusions;Hierarchical features;Images segmentations;Imaging heterogeneities;Mamba;Multimodal imaging;Spine segmentation;State-space model;State-space models;Image enhancement;Artic…	1	2	5	3	1	2	1 - 3 - 4 - 5 - 6	N/A	N	N	M
https://www.scopus.com/inward/record.uri?eid=2-s2.0-105010261487&doi=10.1038%2Fs41598-025-10401-7&partnerID=40&md5=6080b68cfabefb854b4f76ca0d4912a6	Deep learning-based automatic detection and grading of disk herniation in lumbar magnetic resonance images	10.1038/s41598-025-10401-7	2025	Guo, Y. and Huang, X. and Chen, W. and Nakamoto, I. and Zhuang, W. and Chen, H. and Feng, J. and Wu, J.	China	School of Internet Economics and Business, Fujian University of Technology, Fuzhou, 350014, China.	8	4	Retrospective study	Scientific Reports	Deep learning;Lumbar intervertebral discs;Lumbar spine degeneration;Magnetic resonance imaging;Transfer learning;Weighted ensemble learning;Chronic disability;Deep learning;Ensemble learning;Lumbar intervertebral disc;Lumbar spine degeneration;Lumbar spines;State of the art;Transfer learning;Weighted ensemble learning;Article;clinical feature;controlled study;convolutional neural network;data pro…	1	0	1	3	1	2	9	Box Precision - mAP50 - mAP50–95	P	N	R
https://www.scopus.com/inward/record.uri?eid=2-s2.0-105013213563&doi=10.1016%2Fj.mri.2025.110505&partnerID=40&md5=9344e2a81edd5b859bf42160d58161b0	RCLM-net: A rich-club properties based lightweight deep neural network for multimodal sequence spine MR images segmentation	10.1016/j.mri.2025.110505	2025	He, S. and Zhang, M. and Yan, X. and Wang, K. and Chang, X.	China	College of Computer Science and Engineering, Chongqing University of Technology, Chongqing, China. Electronic address: hesiyuan@cqut.edu.cn	5	3	Retrospective study	Magnetic Resonance Imaging	Brucella spondylitis (BS);Deep learning model;Magnetic resonance image;Spine;Tuberculous spondylitis;Computer aided diagnosis;Deep learning;Diseases;Learning systems;Brucella;Brucella spondyliti;Deep learning model;Diagnostic model;General model;Imaging diagnostics;Learning models;Magnetic resonance image;Spine;Tuberculous spondyliti;Magnetic resonance imaging;adult;Article;Brucella spondylitis;b…	1	1	9	5	1	2	1 - 2 - 6 - 9	Pearson correlation coefficient - Cohen’s kappa - ICC	N	Y	R
https://www.scopus.com/inward/record.uri?eid=2-s2.0-105018032512&doi=10.3174%2Fajnr.A8770&partnerID=40&md5=a5aabbf703daaab875f2134f4f16f53e	Severity Classification of Pediatric Spinal Cord Injuries Using Structural MRI Measures and Deep Learning: A Comprehensive Analysis across All Vertebral Levels	10.3174/ajnr.A8770	2025	Sadeghi-Adl, Z. and Naghizadehkashani, S. and Middleton, D. and Krisa, L. and Alizadeh, M. and Flanders, A.E. and Faro, S.H. and Wang, Z. and Mohamed, F.B.	China	From the Department of Electrical and Computer Engineering (Z.S.-A.), Temple University, Philadelphia, Pennsylvania zahra.sadeghiadl@jefferson.edu & 2Jefferson Integrated Magnetic Resonance Imaging Center (JIMRIC), Department of Radiology (Z.S.-A., S.N., D.M., L.K., M.A., A.E.F., S.H.F., F.B.M.), Thomas Jefferson University, Philadelphia, Pennsylvania.	9	4	Retrospective study	American Journal of Neuroradiology	Gradient shunt;Lumbar spine symptoms;Magnetic resonance imaging;MSU;YOLOv8;adult;computer assisted diagnosis;deep learning;diagnostic imaging;female;human;image processing;intervertebral disk hernia;lumbar vertebra;male;middle aged;nuclear magnetic resonance imaging;pathology;procedures;Adult;Deep Learning;Female;Humans;Image Interpretation, Computer-Assisted;Image Processing, Computer-Assisted;I…	1	0	3	6	1	2	3 - 4 - 6	N/A	N	N	C
https://www.scopus.com/inward/record.uri?eid=2-s2.0-105010593887&doi=10.1016%2Fj.ejrad.2025.112310&partnerID=40&md5=916008d0147222e268fb81edca71bc57	Deep learning reconstruction enhances bone visualization in zero echo time MRI for cervical spondylosis: A prospective study	10.1016/j.ejrad.2025.112310	2025	Li, L. and Pan, X. and Liang, H. and Li, T. and Zhou, S. and Gao, W. and Lu, X. and Rong, X.	China	Department of Radiology, West China Hospital of Sichuan University, Chengdu, Sichuan, China. Electronic address: pengli_bonne@163.com.	8	4	Retrospective study	European Journal of Radiology	Lightweight deep neural network;MR image;Multimodal image segmentation;Rich-Club properties;Article;convolutional neural network;cross validation;deep neural network;functional connectivity;human;image analysis;image segmentation;lighweight deep neural network;multimodal imaging;nuclear magnetic resonance imaging;product design;spine disease;spine radiography;validation study;algorithm;artificial…	0	5	1	1	1	2	N/A	SNR - CNR - ICC - Cohen’s weighted κ - non-inferiority - superiority	N	N	R
https://www.scopus.com/inward/record.uri?eid=2-s2.0-85218041722&doi=10.1007%2Fs00586-025-08696-1&partnerID=40&md5=bdc4eaf0cdb6af63f24cdbd7fcb12d35	Deep learning radiomics model based on contrast-enhanced MRI for distinguishing between tuberculous spondylitis and pyogenic spondylitis	10.1007/s00586-025-08696-1	2025	Yang, X. and Tian, N. and Zhang, Y. and Gao, C. and Hao, D. and Li, J. and Zhou, C. and Cui, J.	China	Department of Radiology, The Affiliated Hospital of Qingdao University, Qingdao, Shandong, 266000, China & 2Department of Endocrinology and Metabolism, The Affiliated Hospital of Qingdao University, Qingdao, Shandong, 266000, China.	8	5	Retrospective study	European Spine Journal	accuracy;adolescent;adult;age;American Spinal Injury Association impairment scale;Article;child;clinical assessment;convolutional neural network;cross-sectional study;deep learning;female;height;human;injury severity;machine learning;major clinical study;male;nuclear magnetic resonance imaging;prognosis;random forest;spinal cord injury;T2 weighted imaging;treatment planning	0	2	5	5	1	2	1 - 3 - 5 - 6	NPV	N	N	P
https://www.scopus.com/inward/record.uri?eid=2-s2.0-105015894081&doi=10.3390%2Fs25175603&partnerID=40&md5=50dd1f677f92109e31564de1eb1995b4	DG-TTA: Out-of-Domain Medical Image Segmentation Through Augmentation, Descriptor-Driven Domain Generalization, and Test-Time Adaptation	10.3390/s25175603	2025	Weihsbach, C. and Kruse, C.N. and Bigalke, A. and Heinrich, M.P.	Germany	Institute of Medical Informatics, University of Lübeck, 23562 Lübeck, Germany & EchoScout GmbH, 23562 Lübeck, Germany	4	4	Retrospective study	Sensors	Cervical Spondylosis;Deep Learning Reconstruction;MRI;Musculoskeletal Imaging;Zero Echo Time;adult;Article;artifact;cervical spondylosis;clinical article;contrast to noise ratio;correlation coefficient;cortical bone;deep learning;drug therapy;female;human;image noise;image quality;image reconstruction;male;middle aged;musculoskeletal radiologist;neck muscle;nuclear magnetic resonance imaging;phys…	1	1	9	5	2	2	2	HD95	Y	Y	R
https://www.scopus.com/inward/record.uri?eid=2-s2.0-105014526898&doi=10.1016%2Fj.array.2025.100495&partnerID=40&md5=f88b4bc2ae118a3f7fa0d5695764f1ba	Optimizing spinal cord lesion segmentation using hierarchical classification and U-NET based segmentation model	10.1016/j.array.2025.100495	2025	Cahyadi, D. and Kristian, Y. and Pramana, E. and Wiguna, I.G.L.N.A.A. and Deslivia, M.F. and Pranoto, Y.M. and Liando, I.A. and Limantara, R.	Indonesia	Department of Information Technology, Faculty of Science and Technology, Institut Sains dan Teknologi Terpadu Surabaya, Indonesia	8	5	Retrospective study	Array	Contrast-enhanced MRI;Deep learning;Pyogenic spondylitis;Radiomics;Tuberculous spondylitis;gamma interferon;contrast medium;adult;aged;Article;clinical decision making;clinical feature;cohort analysis;contrast enhancement;deep learning;demographics;destruction;diagnostic accuracy;differential diagnosis;feature extraction;feature selection;female;human;image segmentation;interferon gamma release a…	1	0	3	6	9	2	2 - 4 - 6 - 9	N/A	P	Y	R
https://www.scopus.com/inward/record.uri?eid=2-s2.0-105013774056&doi=10.21037%2Fqims-2025-67&partnerID=40&md5=2e159caa08bd74b9e5aeb3e294b2d4e2	Feasibility of fully automatic assessment of cervical canal stenosis using MRI via deep learning	10.21037/qims-2025-67	2025	Feng, X. and Zhang, Y. and Lu, M. and Ma, C. and Miao, X. and Yang, J. and Lin, L. and Zhang, Y. and Zhang, K. and Zhang, N. and Kang, Y. and Luo, Y. and Cao, K.	China	Department of Diagnostic Radiology, Changhai Hospital, Shanghai, China & Department of Diagnostic Radiology, the Fourth People's Hospital of Shanghai, Shanghai, China & Department of Spine, Changzheng Hospital, Shanghai, China.	13	5	Retrospective study	Quantitative Imaging in Medicine and Surgery	domain generalization;domain-invariant descriptors;test-time adaptation;Image enhancement;Large datasets;Magnetic resonance imaging;Medical image processing;Descriptors;Domain generalization;Domain-invariant descriptor;Generalisation;Invariant descriptors;Pre-training;Segmentation accuracy;Source data;Test time;Test-time adaptation;Image segmentation;algorithm;deep learning;diagnostic imaging;hea…	1	2	1	1	5	3	1 - 3 - 5 - 6	Kappa statistic - Spearman correlation (R)	N	Y	R
https://www.scopus.com/inward/record.uri?eid=2-s2.0-105009761268&doi=10.1016%2Fj.crad.2025.106987&partnerID=40&md5=758296b06d349790d25ef4f7b16beeb3	Ultra-fast single-sequence magnetic resonance imaging (MRI) for lower back pain: diagnostic performance of a deep learning T2-Dixon pprotocol	10.1016/j.crad.2025.106987	2025	Diallo, T.D. and Wiedemann, S. and Berkarda, Z. and Strecker, R. and Nickel, D. and Bamberg, F. and Rau, A. and Mayrhofer, T. and Russe, M.F. and Weiss, J.	Germany	Department of Diagnostic and Interventional Radiology, University Medical Center Freiburg, Faculty of Medicine, University of Freiburg, Germany. Electronic address: thierno.diallo@uniklinik-freiburg.de	10	5	Prospective study	Clinical Radiology	Computer-aided diagnosis;Deep learning;Emergency radiology;Hierarchical classification;Medical image analysis;MRI analysis;Spinal cord lesion segmentation;Transfer learning;U-NET optimization;Automation;Classification (of information);Hospitals;Image analysis;Image classification;Learning systems;Magnetic resonance imaging;Medical computing;Medical image processing;Transfer learning;Computer-aide…	2	2	1	3	1	2	5 - 6	NPV - Cohen's kappa	N	N	R
https://www.scopus.com/inward/record.uri?eid=2-s2.0-105006938871&doi=10.1016%2Fj.acra.2025.05.026&partnerID=40&md5=d2d8fa3323f0d7d7fe1c35438e00a433	A Study on Predicting the Efficacy of Posterior Lumbar Interbody Fusion Surgery Using a Deep Learning Radiomics Model	10.1016/j.acra.2025.05.026	2025	Fang, L. and Pan, Y. and Zheng, H. and Li, F. and Zhang, W. and Liu, J. and Zhou, Q.	China	Department of Medical Imaging, The Third Affiliated Hospital of Southern Medical University (Academy of Orthopedics Guangdong Province), Guangzhou 510630, China	7	4	Retrospective study	Academic Radiology	artificial intelligence (AI);central canal stenosis;Cervical spine;deep learning (DL);magnetic resonance imaging (MRI);accuracy;adolescent;adult;aged;algorithm;area under the curve;Article;artificial intelligence;benchmarking;cervical spinal cord;cervical spinal stenosis;cervical spine;controlled study;convolutional neural network;decision making;deep learning;digital imaging and communications i…	1	4	8	3	7	2	1 - 3 - 4 - 5 - 6	DeLong test (AUC comparison) - Kappa inter-observer agreement	N	N	M
https://www.scopus.com/inward/record.uri?eid=2-s2.0-105004929665&doi=10.1016%2Fj.spinee.2025.03.011&partnerID=40&md5=c85d522f2351fc7b226042bda52b00bf	GPT4LFS (generative pretrained transformer 4 omni for lumbar foramina stenosis): enhancing lumbar foraminal stenosis image classification through large multimodal models	10.1016/j.spinee.2025.03.011	2025	Yilihamu, E.E.-Y. and Zeng, F.-S. and Shang, J. and Yang, J.-T. and Zhong, H. and Feng, S.-Q.	China	Orthopedic Research Center of Shandong University & Advanced Medical Research Institute, Shandong University, Jinan 250000, China. Electronic address: elzatelham@mail.sdu.edu.cn	6	5	Retrospective study	Spine Journal	adult;Article;body mass;claustrophobia;clinical article;controlled study;deep learning;diagnostic test accuracy study;female;health care system;human;informed consent;interrater reliability;low back pain;lumbar spine;male;middle aged;nuclear magnetic resonance imaging;predictive value;prospective study;T1 weighted imaging;T2 weighted imaging;aged;computer assisted diagnosis;diagnostic imaging;lum…	1	2	1	3	9	3	3 - 5	kappa coefficient - confusion matrices	N	Y	R
https://www.scopus.com/inward/record.uri?eid=2-s2.0-105003261682&doi=10.1007%2Fs11604-025-01787-5&partnerID=40&md5=43e0ac3c83a39850955fcfccd99d473a	Super-resolution deep learning reconstruction to evaluate lumbar spinal stenosis status on magnetic resonance myelography	10.1007/s11604-025-01787-5	2025	Yasaka, K. and Asari, Y. and Morita, Y. and Kurokawa, M. and Tajima, T. and Akai, H. and Yoshioka, N. and Akahane, M. and Ohtomo, K. and Abe, O. and Kiryu, S.	Japan	Department of Radiology, Graduate School of Medicine, The University of Tokyo, 7-3-1 Hongo, Bunkyo-Ku, Tokyo, 113-8655, Japan & Department of Radiology, International University of Health and Welfare Narita Hospital, 852 Hatakeda, Narita, Chiba, 286-0124, Japan	11	6	Retrospective study	Japanese Journal of Radiology	Deep learning;Magnetic resonance image;Posterior lumbar interbody fusion;Radiomics;adult;age;Article;body weight;clinical effectiveness;clinical feature;clinical outcome;cohort analysis;computer assisted tomography;controlled study;deep learning;degenerative disease;feature selection;female;human;least absolute shrinkage and selection operator;logistic regression analysis;lumbar spine;major clini…	2	5	1	3	0	2	N/A	Cohen’s Kappa - Weighted Kappa - Signal-to-Noise Ratio	N	N	R
https://www.scopus.com/inward/record.uri?eid=2-s2.0-105004824589&doi=10.1016%2Fj.chemolab.2025.105425&partnerID=40&md5=4caae63276a42ac04aaa7f95ac1ce703	MIAUnet++: Multi-inception attention network for MR spine image segmentation	10.1016/j.chemolab.2025.105425	2025	Li, L. and Fu, X. and Qin, J. and Lv, L. and Cheng, M. and Wang, B. and He, J. and Xia, D. and Wang, M. and Ren, H. and Wang, S.	China	School of Integrated Circuit Science and Engineering, Tianjin University of Technology, Tianjin, 300384, China	11	1	Deep learning segmentation study	Chemometrics and Intelligent Laboratory Systems	Automated Diagnosis;Deep learning;Image Classification;Lumbar degeneration;Lumbar foraminal stenosis;Multimodal Large Language Model;adult;aged;Article;confidence interval;controlled study;diagnostic accuracy;diagnostic test accuracy study;disease classification;female;generative pretrained transformer 4 omni for lumbar foramina stenosis;human;image analysis;image processing;image quality;kappa s…	1	1	1	5	1	2	2 - 5 - 6 - 9	Hausdorff Distance (HD) - Average Symmetric Surface Distance (ASSD)	Y	N	R
https://www.scopus.com/inward/record.uri?eid=2-s2.0-85219495528&doi=10.1016%2Fj.bspc.2025.107770&partnerID=40&md5=4572512f94b08f90082dee9bd7c2dbd7	Deep learning-assisted framework for automation of lumbar vertebral body segmentation, measurement, and deformity detection in MR images	10.1016/j.bspc.2025.107770	2025	Al-Haidri, W. and Akhatov, A. and Usmanova, I. and Salimov, F. and Al-Habeeb, M. and Il'Yasov, K.A. and Brui, E.A.	Russia	School of Physics and Engineering, ITMO University, St. Petersburg, Russia	7	3	Retrospective study	Biomedical Signal Processing and Control	Deep learning;Lumbar spinal stenosis;MRI;Reconstruction;Super-resolution;adult;Article;artifact;cauda equina;clinical article;clinical evaluation;conus medullaris;data analysis;deep learning;female;filum terminale;human;image analysis;image noise;image quality;interrater reliability;lumbar spinal stenosis;magnetic resonance myelography;male;nuclear magnetic resonance imaging;radiologist;retrospec…	1	0	9	3	1	1	2 - 7 - 9	Limits of Agreement (LoA) - MAE	N	N	R
https://www.scopus.com/inward/record.uri?eid=2-s2.0-105006771908&doi=10.1007%2Fs11760-025-04175-8&partnerID=40&md5=1284796485a0b9cb56cee8b595d68818	Segmentation Simplified: Lumbar Spine MRI Segmentation via a Tailored U-Net Architecture	10.1007/s11760-025-04175-8	2025	Hassan, M. and Shafique, R. and Ahmad Farhan, A.	Pakistan	National University of Computer and Emerging Sciences (FAST-NUCES) in Pakista	3	1	Retrospective study	Signal, Image and Video Processing	Attention mechanism;Convolutional neural network;Deep learning;Inception;MR spine segmentation;Convolutional neural networks;Deep neural networks;Functional neuroimaging;Image coding;Image compression;Photointerpretation;Attention mechanisms;Convolutional neural network;Deep learning;Encoder-decoder;Features extraction;Images segmentations;Inception;MR spine segmentation;Multi-scale features;Spin…	0	1	9	3	1	2	2 - 9	Hausdorff Distance (HD) - Average Symmetric Surface Distance (ASSD)	Y	N	R
https://www.scopus.com/inward/record.uri?eid=2-s2.0-105015373080&doi=10.22266%2Fijies2025.0731.48&partnerID=40&md5=9f3f2e4990bf33981587a0ab20a18d74	Multi-feature Fusion based Deep Learning Framework for Enhanced Intervertebral Disc Degeneration Classification	10.22266/ijies2025.0731.48	2025	Shroff, A.D. and Jain, D.	India	Sage University, Indore, Madhya Pradesh, India	2	1	Retrospective study	International Journal of Intelligent Engineering and Systems	Deep learning;Morphologic quantification;MR image analysis;MR image segmentation;Vertebral deformity;Deep neural networks;Image analysis;Image segmentation;Musculoskeletal system;Deep learning;Image analyze;Image-analysis;Images segmentations;Morpho-logics;Morphologic quantification;MR image analyze;MR image segmentation;MR-images;Vertebral deformity;Magnetic resonance imaging;adult;anatomical la…	0	2	1	3	1	2	3 - 4 - 6	N/A	Y	N	R
https://www.scopus.com/inward/record.uri?eid=2-s2.0-85219087346&doi=10.1016%2Fj.acra.2025.02.024&partnerID=40&md5=574ad93f85182169935124d7da07484a	Denoising Diffusion Probabilistic Model to Simulate Contrast-enhanced spinal MRI of Spinal Tumors: A Multi-Center Study	10.1016/j.acra.2025.02.024	2025	Wang, C. and Zhang, S. and Xu, J. and Wang, H. and Wang, Q. and Zhu, Y. and Xing, X. and Hao, D. and Lang, N.	China	Department of Radiology, State Key Laboratory of Vascular Homeostasis and Remodeling, Peking University Third Hospital, 49 North Garden Road, Haidian District, Beijing 100191, PR China	9	4	Retrospective study	Academic Radiology	Deep Learning;Lumbar Spine;MRI;Segmentation;U-Net;Angiography;Deep neural networks;Image segmentation;Mammography;Neuroimaging;Complex anatomy;Condition;Deep learning;Lower back pain;Lumbar spines;Machine learning techniques;Morphological study;NET architecture;Segmentation;U-net;Convolutional neural networks	1	8	2	5	0	2	4 - 5 - 6	Mean Squared Error (MSE), Structural Similarity Index (SSIM), Peak Signal-to-Noise Ratio (PSNR), False Discovery Rate (FDR), Signal-to-Noise Ratio (SNR), and Contrast-to-Noise Ratio (CNR)	N	Y	R
https://www.scopus.com/inward/record.uri?eid=2-s2.0-85216258121&doi=10.1002%2Fjmri.29720&partnerID=40&md5=d070701f38f8785e47ad139bd5e797f3	Identifying Primary Sites of Spinal Metastases: Expert-Derived Features vs. ResNet50 Model Using Nonenhanced MRI	10.1002/jmri.29720	2025	Liu, K. and Ning, J. and Qin, S. and Xu, J. and Hao, D. and Lang, N.	China	Department of Radiology, Peking University Third Hospital, Beijing, China & Department of Informatics, King's College London, London, UK.	6	3	Retrospective study	Journal of Magnetic Resonance Imaging	Convolutional neural networks;Histogram-based feature;Intervertebral disc;Textural feature	1	2	2	5	1	2	1 - 3 - 4 - 5 - 6	SHAP	N	N	P
https://www.scopus.com/inward/record.uri?eid=2-s2.0-105010882826&doi=10.1371%2Fjournal.pone.0327642&partnerID=40&md5=4b708808dbb0cb9512a136fd1ac3e085	CAFR-Net: A transformer-contrastive framework for robust spinal MRI segmentation via global-local synergy	10.1371/journal.pone.0327642	2025	Ma, R. and Dai, X. and Yang, Z. and Wei, Z. and Zhang, B.	China	Information Center, Gansu Provincial Maternity and Child care Hospital (GansuProvincial Central Hospital), Gansu, China	5	1	Retrospective study	PLOS ONE	Contrast media;Deep learning;Gadolinium;Magnetic resonance imaging;Spine;contrast medium;gadolinium;adult;Article;confidence interval;contrast enhancement;contrast to noise ratio;controlled study;deep learning;diagnostic imaging;false discovery rate;false negative result;female;Gaussian noise;human;image quality;major clinical study;male;mean squared error;multicenter study;nuclear magnetic reson…	0	1	1	5	6	2	2 - 9	Hausdorff Distance	Y	N	R
https://www.scopus.com/inward/record.uri?eid=2-s2.0-105003739177&doi=10.1002%2Fmp.17842&partnerID=40&md5=2bd154074d7c594ed5f0dc053298f842	Multi-modality multiorgan image segmentation using continual learning with enhanced hard attention to the task	10.1002/mp.17842	2025	Wu, M.-L. and Peng, Y.-F.	Taiwan	Department of Computer Science and Information Engineering, National Cheng Kung University, Tainan, Taiwan & Institute of Medical Informatics, National Cheng Kung University, Tainan, Taiwan	2	2	Retrospective study	Medical Physics	deep learning;machine learning;noncontrast MRI;primary tumor site;spinal metastases;accuracy;adult;advanced cancer;algorithm;apparent diffusion coefficient;area under the curve;Article;artificial intelligence;breast cancer;female;follow up;gastrointestinal cancer;human;kidney cancer;lung cancer;machine learning;male;metastasis;middle aged;nuclear magnetic resonance imaging;pathologic fracture;pla…	1	1	9	3	1	2	2	Hausdorff Distance - Forgetting Rate - Backward/Forward Transfer (BWT/FWTt)	Y	N	R
https://www.scopus.com/inward/record.uri?eid=2-s2.0-86000722835&doi=10.1016%2Fj.measurement.2025.117294&partnerID=40&md5=3160b7250a21a6f4ebb5c7d8f54b3a0d	Deep Learning-Driven MRI analysis for accurate diagnosis and grading of lumbar spinal stenosis	10.1016/j.measurement.2025.117294	2025	Gen√ß, H. and Seyyarer, E. and Ayata, F.	Turkey	Elazığ Fethi Sekin City Hospital, Radiology Clinic, 23280 Elâzığ, Türkiye	3	3	Retrospective study	Measurement: Journal of the International Measurement Confederation	architecture;Article;CAFR Net;convolutional neural network;data processing;deep learning;degradation;diagnostic imaging;histogram;human;image analysis;image segmentation;locally adaptive feature recalibration;lumbar vertebra;machine learning;nuclear magnetic resonance imaging;prediction;sacrum;semi supervised machine learning;temperature;theoretical neuroscience;training;algorithm;image processin…	0	2	1	3	1	2	3 - 4 - 5 - 6	N/A	N	N	R
https://www.scopus.com/inward/record.uri?eid=2-s2.0-105011507632&doi=10.1162%2FIMAG.a.45&partnerID=40&md5=a585975586cc8f8a8b4508ff6c8d977a	Automatic segmentation of spinal cord lesions in MS: A robust tool for axial T2-weighted MRI scans	10.1162/IMAG.a.45	2025	Naga Karthik, E. and McGinnis, J. and Wurm, R. and Ruehling, S. and Graf, R. and Valosek, J. and Benveniste, P.-L. and Lauerer, M. and Talbott, J. and Bakshi, R. and Tauhid, S. and Shepherd, T. and Berthele, A. and Zimmer, C. and Hemmer, B. and Rueckert, D. and Wiestler, B. and Kirschke, J.S. and Cohen-Adad, J. and M√ºhlau, M.	Canada	NeuroPoly Lab, Institute of Biomedical Engineering, Polytechnique Montreal, Montreal, QC, Canada & Mila - Quebec AI Institute, Montreal, QC, Canada	20	12	Retrospective study	Imaging Neuroscience	continual learning;hard attention to the task;image segmentation;medical image;Dynamic contrast enhanced MRI;Functional neuroimaging;Image coding;Image enhancement;Neurophysiology;Photointerpretation;Transillumination;Continual learning;Hard attention to the task;Images segmentations;Learning methods;Medical image;Multi-modality;Multi-organ segmentations;Multiple tasks;Neural-networks;Task modell…	1	1	5	5	2	2	2 - 4 - 5 - 6	NSD, RVE, the average absolute difference in lesion count	N	Y	R
https://www.scopus.com/inward/record.uri?eid=2-s2.0-105009135729&doi=10.3390%2Fbioengineering12060604&partnerID=40&md5=dc19fa63772c271c70265434d17ef45a	Deep-Learning-Based Computer-Aided Grading of Cervical Spinal Stenosis from MR Images: Accuracy and Clinical Alignment	10.3390/bioengineering12060604	2025	Wang, Z. and Chen, X. and Liu, B. and Hai, J. and Qiao, K. and Yuan, Z. and Yang, L. and Yan, B. and Su, Z. and Lu, H.	China	Fifth Affiliated Hospital of Sun Yat-sen University, Department of Spinal Surgery, 52 East Meihua Rd, Xiangzhou, Zhuhai 519000, China	10	4	Retrospective study	Bioengineering	CNN;Early Stopping;EfficientNET;Genetic Algorithm;K-fold;Lomber MRG;Convolutional neural network;Early stopping;Efficientnet;K-fold;Lomber MRG;Machine learning algorithms;Medical data;MRI-analysis;Neural-networks;Spinal stenosis;Convolutional neural networks	1	0	1	1	1	3	1 - 3 - 4 - 5 - 6 - 8	Cohen’s kappa - Spearman correlation coefficient	N	N	R
https://www.scopus.com/inward/record.uri?eid=2-s2.0-105000912319&doi=10.1007%2Fs11547-025-01996-y&partnerID=40&md5=fed8977608ba88b73740781efd387465	Quantification and classification of lumbar disc herniation on axial magnetic resonance images using deep learning models	10.1007/s11547-025-01996-y	2025	Yilihamu, E.E.-Y. and Shang, J. and Su, Z. and Yang, J.-T. and Zhao, K. and Zhong, H. and Feng, S.-Q.	China	Orthopedic Research Center of Shandong University & Advanced Medical Research Institute, Shandong University, Jinan, 250000, China & Qilu Hospital of Shandong University, Shandong University, Jinan, 250000, China & Renci Hospital of Xuzhou Medical University, Xuzhou, 221000, China	7	11	Retrospective study	Radiologia Medica	deep learning;lesions;MRI;multiple sclerosis;segmentation;spinal cord	1	0	1	3	1	1	3 - 4 - 5 - 6 - 7 - 9	mAP50:95 - kappa coefficient	N	Y	R
https://www.scopus.com/inward/record.uri?eid=2-s2.0-85215839514&doi=10.1016%2Fj.acra.2024.12.060&partnerID=40&md5=968f1b677b4156717de46d569248df16	Advanced Automated Model for Robust Bone Marrow Segmentation in Whole-body MRI	10.1016/j.acra.2024.12.060	2025	Bauer, F. and Kachele, J. and Bernhard, J. and Hajiyianni, M. and Weinhold, N. and Sauer, S. and Gr√∂zinger, M. and Raab, M.-S. and Mai, E.K. and Weber, T.F. and Goldschmidt, H. and Schlemmer, H.-P. and Maier-Hein, K. and Delorme, S. and Neher, P. and Wennmann, M.	Germany + USA	Division of Radiology, German Cancer Research Center (DKFZ), 69120 Heidelberg, Germany (F.B., M.G., H.P.S., S.D.); Division of Musculoskeletal Imaging and Intervention, Massachusetts General Hospital and Harvard Medical School, Boston, MA 02114 (F.B.). Electronic address: fabian.bauer@dkfz-heidelberg.de	16	9	Retrospective study	Academic Radiology	automatic measurement;cervical spinal stenosis;classification;deep learning;target detection	1	1	2	5	2	3	2	N/A	N	N	R
https://www.scopus.com/inward/record.uri?eid=2-s2.0-105003566398&doi=10.1177%2F21925682241299332&partnerID=40&md5=434d3540835e63ce53e6d995aace955e	Lumbar Spinal Stenosis Grading in Multiple Level Magnetic Resonance Imaging Using Deep Convolutional Neural Networks	10.1177/21925682241299332	2025	Won, D. and Lee, H.-J. and Lee, S.-J. and Park, S.H.	Republic of Korea	Department of Robotics and Mechatronics Engineering, Daegu Gyeongbuk Institute of Science and Technology, Daegu, Korea	4	4	Retrospective study	Global Spine Journal	Deep learning;Low back pain;Lumbar disc herniation;MRI;adult;aged;classification;deep learning;diagnostic imaging;female;human;intervertebral disk hernia;lumbar vertebra;male;middle aged;nuclear magnetic resonance imaging;procedures;retrospective study;Adult;Aged;Deep Learning;Female;Humans;Intervertebral Disc Displacement;Lumbar Vertebrae;Magnetic Resonance Imaging;Male;Middle Aged;Retrospective…	1	0	1	3	1	1	3 - 4	N/A	N	N	R
https://www.scopus.com/inward/record.uri?eid=2-s2.0-105002007725&doi=10.1016%2Fj.neuroimage.2025.121189&partnerID=40&md5=4ecd3b1969ef244577660999b6f4c9d5	Automated segmentation of the dorsal root ganglia in MRI	10.1016/j.neuroimage.2025.121189	2025	Nauroth-Kre√ü, A.C. and Weiner, S. and H√∂lzli, L. and Kampf, T. and Homola, G.A. and Pham, M. and Kollmannsberger, P. and Schindeh√ºtte, M.	Germany	Department of Neuroradiology, University Hospital Würzburg, Würzburg 97080, Germany	8	3	Prospective study	NeuroImage	Deep Learning;Magnetic Resonance Imaging;Multiple Myeloma;Segmentation;monoclonal antibody;adult;aged;Article;bone marrow;cervical vertebra;comparative study;controlled study;deep learning;female;human;image quality;image segmentation;major clinical study;male;multicenter study;multiple myeloma;nuclear magnetic resonance imaging;plasma cell;retrospective study;segmentation algorithm;systemic ther…	1	1	9	6	1	3	2 - 7	ASD - PCC	N	Y	R
https://www.scopus.com/inward/record.uri?eid=2-s2.0-85217211632&doi=10.1016%2Fj.cmpb.2025.108639&partnerID=40&md5=15877a91ab694761ab2edb609004201f	Hybrid-noise generative diffusion probabilistic model for cervical spine MRI image generation	10.1016/j.cmpb.2025.108639	2025	Pan, E. and Zhong, Y. and Li, P. and Yang, Y. and Zhou, J.	China	School of Computer Science and Software Engineering, Southwest Petroleum University, Xindu road no. 8, Chengdu, 610500, China	5	3	Technical / Methodological (AI model development)	Computer Methods and Programs in Biomedicine	deep convolutional neural networks;grading;lumbar;multiple level;spinal stenosis;Article;convolutional neural network;deep learning;diagnostic test accuracy study;human;lumbar spinal stenosis;major clinical study;nuclear magnetic resonance imaging;T2 weighted imaging	1	8	0	1	1	2	2 - 9	FID - MS-SSIM - Relative enhancement effect	P	N	R
https://www.scopus.com/inward/record.uri?eid=2-s2.0-85216069183&doi=10.1016%2Fj.media.2025.103473&partnerID=40&md5=0fc4a169fae3c3db68ce92dd9400f50a	Towards contrast-agnostic soft segmentation of the spinal cord	10.1016/j.media.2025.103473	2025	B√©dard, S. and Karthik, E.N. and Tsagkas, C. and Pravat√†, E. and Granziera, C. and Smith, A. and Weber II, K.A. and Cohen-Adad, J.	Canada	NeuroPoly Lab, Institute of Biomedical Engineering, Polytechnique Montréal, Montréal, Québec, Canada	8	10	Methodological / algorithm development study	Medical Image Analysis	Convolutional neural network;Deep learning;Dorsal root ganglion;Machine learning;Neuropathic pain;NNU-Net;biological marker;architecture;Article;cohort analysis;conceptual framework;controlled study;convolutional neural network;deep learning;diffusion tensor imaging;Fabry disease;female;functional connectivity;functional magnetic resonance imaging;genotype;human;human tissue;image analysis;image …	1	1	9	6	2	2	2	ASD - RVE - CSA STD - CSA error - inference time	Y	Y	R
https://www.scopus.com/inward/record.uri?eid=2-s2.0-85213271661&doi=10.1016%2Fj.bspc.2024.107332&partnerID=40&md5=616e20db9078a8882c6b04a223885550	Classification of intervertebral disc using novel multi-branch convolutional residual network model	10.1016/j.bspc.2024.107332	2025	Ram, I. and Kumar, S. and Keshri, A.K.	India	Department of Computer Science and Engineering, National Institute of Technology, Jamshedpur 831014, India	3	3	Algorithm development / methodological study	Biomedical Signal Processing and Control	Cervical spine;Diffusion models;Hybrid noise;Medical image generation;MRI;Dynamic contrast enhanced MRI;Gaussian noise (electronic);Image enhancement;Image quality;Cervical spine;Diffusion model;Gaussians;High quality;Hybrid noise;Image data;Image generations;Medical image generation;MRI Image;Probabilistic models;Image segmentation;algorithm;Article;cervical spine;comparative study;controlled st…	0	2	1	3 - 4	1	1	2 - 3 - 4 - 5 - 6	MDOC - ASD	Y	N	R
https://www.scopus.com/inward/record.uri?eid=2-s2.0-105003698399&doi=10.3390%2Fdiagnostics15081041&partnerID=40&md5=7482bf135de8db58c65625e20b435c60	Fractal-Based Architectures with Skip Connections and Attention Mechanism for Improved Segmentation of MS Lesions in Cervical Spinal Cord	10.3390/diagnostics15081041	2025	Polattimur, R. and Yildirim, M.S. and Dandil, E.	Turkey	Department of Electronics and Computer Engineering, Institute of Graduate, Bilecik Seyh Edebali University, 11230 Bilecik, Türkiye	3	3	Retrospective study	Diagnostics	Contrasts;Deep learning;MRI;Partial volume effect;Segmentation;Soft labels;Spinal cord;Arthroplasty;Dynamic contrast enhanced MRI;Neurodegenerative diseases;Regression analysis;Contrast;Cross sectional area;Deep learning;Ground truth;Loss functions;MRI contrasts;Partial-volume effects;Segmentation;Soft labels;Spinal-cord;Cerebrospinal fluid;contrast medium;adult;Article;cervicobrachial neuralgia;…	1	1	5	1	1	2	2 - 3 - 6	VOE - RVD - ASD - HD - HD95 - Binary Cross-entropy Loss - Computational Efficiency Metrics	Y	P	R
https://www.scopus.com/inward/record.uri?eid=2-s2.0-105003414355&doi=10.3390%2Fjcm14082809&partnerID=40&md5=e4badd2fda86da980f1f0fae1cecc1f5	Generating a Synthetic Lumbar CT from a Standard MRI Protocol	10.3390/jcm14082809	2025	Shilo, Y. and Phillips, F.M. and Witham, T.F. and Poelstra, K. and Hodeda, L. and Stavsky, M.	Israel	MRI2CT, Jerusalem 9463121, Israel	6	5	Retrospective study	Journal of Clinical Medicine	Computer aided Diagnosis (CAD);Convolutional Neural Networks (CNN);Decision‚Äëbased median filtering (DMF);Deep Neural Network (DNN);Intervertebral Disc Degeneration (IVD);Convolutional neural networks;Deep neural networks;Diagnosis;Diseases;Image enhancement;Image segmentation;Median filters;Population statistics;Walsh transforms;Computer aided diagnose;Computer-aided;Convolutional neural networ…	0	8	9	3	1	2	3 - 8	Pearson’s correlation coefficient	N	N	M
https://www.scopus.com/inward/record.uri?eid=2-s2.0-105002297137&doi=10.3174%2Fajnr.A8567&partnerID=40&md5=8941da96bf83268aab32a25ffb339e4f	Deep Learning-Based Reconstruction for Accelerated Cervical Spine MRI: Utility in the Evaluation of Myelopathy and Degenerative Diseases	10.3174/ajnr.A8567	2025	Koo, S.J. and Yoo, R.-E. and Choi, K.S. and Lee, K.H. and Lee, H.B. and Shin, D.-J. and Yoo, H. and Choi, S.H.	Republic of Korea	From the Department of Radiology, Seoul National University Hospital, Seoul National University College of Medicine, Seoul, Republic of Korea	8	5	Prospective study	American Journal of Neuroradiology	Att-FractalSpiNet;automatic segmentation;cervical spinal cord;Con-FractalU-Net;FractalSpiNet;MRI;multiple sclerosis;U-Net;Article;Att-FractalSpiNet model;cervical spinal cord;comparative study;computer assisted diagnosis;computer language;Con-FractalU-Net model;convolutional neural network;deep learning;diagnostic accuracy;false positive result;feature extraction;feature selection;female;fractal …	1	5	1	1	1	3	5	SNR - CNR - Qualitative image quality scores - Artifact scores	N	N	R
https://www.scopus.com/inward/record.uri?eid=2-s2.0-85209894702&doi=10.1016%2Fj.eswa.2024.125862&partnerID=40&md5=6e46a9191ec1392b9047e2e18af408c9	Machine-agnostic automated lumbar MRI segmentation using a cascaded model based on generative neurons	10.1016/j.eswa.2024.125862	2025	Basak, P. and Sarmun, R. and Kabir, S. and Al-Hashimi, I. and Bhuiyan, E.H. and Hasan, A. and Khan, M.S. and Chowdhury, M.E.H.	Bangladesh	Department of Electrical and Electronic Engineering, University of Dhaka, Dhaka 1000, Bangladesh	8	5	Retrospective study	Expert Systems with Applications	artificial intelligence;deep learning;lumbar MRI;lumbar spine surgery;MRI to CT;spine MRI;surgery planning;synthetic CT;adult;aged;Article;artificial intelligence;bone lesion;bone structure;convolutional neural network;female;human;image quality;image reconstruction;lordosis;lumbar spine;middle aged;nuclear magnetic resonance imaging;osteophyte;retrospective study;spine surgery;spinous process;sp…	1	1	9	3	0	2	2 - 3 - 5 - 6 - 9	mAP	Y	N	R
https://www.scopus.com/inward/record.uri?eid=2-s2.0-85218895787&doi=10.1016%2Fj.wneu.2025.123728&partnerID=40&md5=c4ed0e2f5be6877714115d81e4b55e09	Deep Learning for Lumbar Disc Herniation Diagnosis and Treatment Decision-Making Using Magnetic Resonance Imagings: A Retrospective Study	10.1016/j.wneu.2025.123728	2025	He, Y. and He, Z. and Qiu, Y. and Liu, Z. and Huang, A. and Chen, C. and Bian, J.	China	Department of Spine Surgery, The Affiliated Taizhou People's Hospital of Nanjing Medical University, Taizhou School of Clinical Medicine, Nanjing Medical University, Taizhou, Jiangsu, China; Division of Spine Surgery, Department of Orthopedic Surgery, Nanjing Drum Tower Hospital Clinical College of Nanjing Medical University, Nanjing, Jiangsu, China	7	4	Retrospective study	World Neurosurgery	gadobutrol;adult;aged;Article;bone marrow;cervical myelopathy;cervical spinal stenosis;cervical spine radiography;clinical article;cohort analysis;contrast to noise ratio;deep learning;degenerative disease;diagnostic accuracy;diagnostic test accuracy study;digital imaging and communications in medicine;female;human;image quality;image reconstruction;intervertebral disk;intervertebral disk hernia;…	1	2	1	3	1	3	1 - 3 - 4 - 5 - 6	NPV - Precision–Recall curve	N	N	R
https://www.scopus.com/inward/record.uri?eid=2-s2.0-85217941995&doi=10.1016%2Fj.wneu.2025.123669&partnerID=40&md5=044ca284947c1941cf85928e9f3c3dae	Development of a Machine-Learning Algorithm to Identify Cauda Equina Compression on Magnetic Resonance Imaging Scans	10.1016/j.wneu.2025.123669	2025	Biswas, S. and Sarkar, V. and MacArthur, J.I. and Guo, L. and Deng, X. and Snowdon, E. and Ahmed, H. and Tetlow, C. and George, K.J.	United Kingdom	Specialized Foundation Doctor Training Programme, Edge Hill University, Omskirk, England, United Kingdom. Electronic address: sayan.biswas@nca.nhs.uk	9	9	Retrospective study	World Neurosurgery	Deep learning;Intervertebral disc;Lumber vertebrae;MRI;Semantic segmentation;Deep neural networks;Diagnosis;Image coding;Image enhancement;Network coding;Neurons;Cascaded models;Deep learning;Intervertebral disk;Lumbar vertebra;Lumber vertebrae;MRI segmentation;Neural-networks;Performance;Self-organised;Semantic segmentation;Semantic Segmentation	0	2	1	3	1	0	1 - 3 - 5 - 6	Brier score loss	N	N	R
https://www.scopus.com/inward/record.uri?eid=2-s2.0-85211937569&doi=10.1007%2Fs00586-024-08609-8&partnerID=40&md5=9b542d1405a2bad368f52d0259c41ec3	An integrative nomogram based on MRI radiomics and clinical characteristics for prognosis prediction in cervical spinal cord Injury	10.1007/s00586-024-08609-8	2025	Zhang, Z. and Li, N. and Ding, Y. and Cheng, H.	China	School of Medicine, Southeast University, Nanjing, China	4	4	Retrospective study	European Spine Journal	Convolutional neural network;Deep learning;Diagnosis;Lumbar disc herniation;Magnetic resonance imaging;Treatment;adult;Article;clinical effectiveness;clinical practice;convolutional neural network;deep learning;diagnostic accuracy;false negative result;false positive result;female;human;intervertebral disk;intervertebral disk hernia;leg pain;low back pain;lumbar disk hernia;major clinical study;m…	0	4	3	1	9	2	1 - 3 - 4 - 5 - 6	N/A	N	Y	C
https://www.scopus.com/inward/record.uri?eid=2-s2.0-85207878613&doi=10.1007%2Fs00330-024-11155-y&partnerID=40&md5=889e9231a89ed8abb424189eb0ead1ab	SPINEPS‚Äîautomatic whole spine segmentation of T2-weighted MR images using a two-phase approach to multi-class semantic and instance segmentation	10.1007/s00330-024-11155-y	2025	M√∂ller, H.K. and Graf, R. and Schmitt, J. and Keinert, B. and Sch√∂n, H. and Atad, M. and Sekuboyina, A. and Streckenbach, F. and Kofler, F. and Kroencke, T. and Bette, S. and Willich, S.N. and Keil, T. and Niendorf, T. and Pischon, T. and Endemann, B. and Menze, B. and Rueckert, D. and Kirschke, J.S.	Germany	Department of Diagnostic and Interventional Neuroradiology, School of Medicine and Health, Technical University of Munich, Munich, Germany & Institut Für KI Und Informatik in Der Medizin, Klinikum Rechts Der Isar, Technical University of Munich, Munich, Germany	19	18	Retrospective study	European Radiology	Cauda equina compression;CNN;Mid-sagittal MRI;adult;Article;automation;calibration;cauda equina;cauda equina syndrome;clinical feature;cohort analysis;computer vision;controlled study;convolutional neural network;decision making;deep learning;diagnostic accuracy;diagnostic test accuracy study;digital imaging and communications in medicine;disease classification;false negative result;false positiv…	1	1	9	5	2	2	2	ASSD - RQ - SQ - PQ	P	Y	M
https://www.scopus.com/inward/record.uri?eid=2-s2.0-85219504924&doi=10.1088%2F1361-6501%2Fad876d&partnerID=40&md5=f6c9146df185914c1b4841cdefaf0641	MFHARFNet: multi-branch feature hybrid and adaptive receptive field network for image segmentation	10.1088/1361-6501/ad876d	2025	Li, M. and Yun, J. and Jiang, D. and Tao, B. and Liu, R. and Li, G.	China	Research Center for Biomimetic Robot and Intelligent Measurement and Control, Wuhan University of Science and Technology, Wuhan 430081, People’s Republic of China	6	5	Data-driven AI/machine learning study	Measurement Science and Technology	Cervical spinal cord injury;Deep learning;MRI;Nomogram;Pretherapy prediction;Radiomics;American Spinal Injury Association impairment scale;Article;cervical spinal cord injury;clinical feature;cohort analysis;deep learning;feature extraction;feature selection;female;Functional Independence Measure;human;image segmentation;incidence;intermethod comparison;least absolute shrinkage and selection oper…	1	1	9	5	1	2	2 - 4 - 6 - 9	Hd95	Y	Y	R
https://www.scopus.com/inward/record.uri?eid=2-s2.0-86000672748&doi=10.1177%2F08953996241289745&partnerID=40&md5=bba59cb9cf39d947e17aa274f1184567	MRI classification and discrimination of spinal schwannoma and meningioma based on deep learning	10.1177/08953996241289745	2025	Liu, Y. and Zhou, Z. and Wang, Y.	China	School of Health Science and Engineering, University of Shanghai for Science and Technology, Shanghai, China	3	2	Retrospective study	Journal of X-Ray Science and Technology	Deep learning;Intervertebral disc;Magnetic resonance imaging;Spine;Vertebral body;adult;Article;clinical feature;cohort analysis;controlled study;demographics;female;human;image segmentation;intervertebral disk;major clinical study;male;middle aged;nuclear magnetic resonance;retrospective study;sacrum;spinal cord;T2 weighted imaging;vertebral canal;Wilcoxon signed ranks test;aged;computer assiste…	0	2	2	6	1	2	3 - 4 - 5 - 6	N/A	N	N	P
https://www.scopus.com/inward/record.uri?eid=2-s2.0-85216798306&doi=10.3389%2Ffbioe.2025.1526478&partnerID=40&md5=d8fdcf67f2af0307a82bda550bf9741e	Automated diagnosis and grading of lumbar intervertebral disc degeneration based on a modified YOLO framework	10.3389/fbioe.2025.1526478	2025	Wang, A. and Wang, T. and Liu, X. and Fan, N. and Yuan, S. and Du, P. and Zou, C. and Chen, R. and Xi, Y. and Gu, Z. and Song, H. and Fei, Q. and Zhang, Y. and Zang, L.	China	Department of Orthopedics, Beijing Chaoyang Hospital, Capital Medical University, Beijing, China & School of Life Sciences, Tsinghua University, Beijing, China & Department of Biomedical Engineering, School of Medicine, Tsinghua University, Beijing, China & Institute of Biomedical and Health Engineering (iBHE), Tsinghua Shenzhen International Graduate School, Shenzhen, China	14	7	Retrospective study	Frontiers in Bioengineering and Biotechnology	convolutional neural network;feature hybrid skip connection;feature selection;medical image segmentation;multi-branch feature hybrid attention;Computerized tomography;Diagnosis;Image analysis;Image coding;Image enhancement;Image understanding;Magnetic resonance imaging;Medical image processing;Network coding;Rock drills;Semantic Segmentation;Convolutional neural network;Encoder-decoder;Feature hy…	0	2	1	3	1	1	1 - 4 - 6	weighted Cohen’s kappa	N	N	R
https://www.scopus.com/inward/record.uri?eid=2-s2.0-85212584145&doi=10.32604%2Fcmes.2024.056424&partnerID=40&md5=2701d65a546a4874850d40e9d8a6a62a	Semantic Segmentation of Lumbar Vertebrae Using Meijering U-Net (MU-Net) on Spine Magnetic Resonance Images	10.32604/cmes.2024.056424	2025	Lakshmi, S.V.V. and Darmanayagam, S.E. and Cyril, S.R.R.	India	Department of Computer Science and Engineering, College of Engineering Guindy, Anna University , Chennai, 600025 , India	3	2	Retrospective study	CMES - Computer Modeling in Engineering and Sciences	deep learning;feature fusion;magnetic resonance imaging;selective convolution kernel;spinal cord tumor;adult;aged;classification;deep learning;diagnostic imaging;differential diagnosis;female;human;male;meningeal tumor;meningioma;middle aged;neurilemoma;nuclear magnetic resonance imaging;pathology;procedures;retrospective study;spinal cord tumor;Adult;Aged;Deep Learning;Diagnosis, Differential;Fe…	0	1	9	3	1	2	2 - 3 - 9	MPA	Y	N	R
https://www.scopus.com/inward/record.uri?eid=2-s2.0-85206291741&doi=10.1136%2Fard-2024-225862&partnerID=40&md5=9a2a2151423997ab12714e03e3865d67	Performance analysis of a deep-learning algorithm to detect the presence of inflammation in MRI of sacroiliac joints in patients with axial spondyloarthritis	10.1136/ard-2024-225862	2025	Nicolaes, J. and Tselenti, E. and Aouad, T. and L√≥pez-Medina, C. and Feydy, A. and Talbot, H. and Hoepken, B. and de Peyrecave, N. and Dougados, M.	Belgium	Department of Electrical Engineering (ESAT), Center for Processing Speech and Images, KU Leuven, Leuven, Belgium & UCB Pharma, Brussels, Belgium	9	9	Retrospective study	Annals of the Rheumatic Diseases	artificial intelligence;deep learning;diagnosis;intervertebral disc degeneration;magnetic resonance imaging;Diagnosis;Disks (machine components);Image annotation;Automated diagnosis;Automated grading;Deep learning;Diagnostic performance;Disc degeneration;High intensity zone;Inter-vertebral disc degeneration;Lumbar intervertebral disc;Test sets;Zone detection	2	2	5	4	1	1	5 - 6	Cohen’s Kappa	Y	N	R
https://www.scopus.com/inward/record.uri?eid=2-s2.0-85191842482&doi=10.1002%2Fjmri.29403&partnerID=40&md5=866ae207c6be0f649c4dce5a50333788	Deep Learning Model for Grading and Localization of Lumbar Disc Herniation on Magnetic Resonance Imaging	10.1002/jmri.29403	2025	Xu, Y. and Zheng, S. and Tian, Q. and Kou, Z. and Li, W. and Xie, X. and Wu, X.	China	Department of Spine Surgery, ZhongDa Hospital, School of Medicine, Southeast University, Nanjing, China	7	1	Retrospective study	Journal of Magnetic Resonance Imaging	Computer aided diagnosis (CAD);deep learning;lumbar vertebrae;magnetic resonance imaging (MRI);semantic segmentation;U-Net model;Arthroplasty;Diagnosis;Magnetic resonance imaging;Medical image processing;Medical problems;Musculoskeletal system;Tissue engineering;Computer aided diagnose;Computer-aided;Deep learning;Intervertebral disk;Lower back pain;Lumbar vertebra;Net model;Semantic segmentation…	1	0	1	3	1	1	5 - 6 - 9	Gwet's AC1	P	P	R
https://www.scopus.com/inward/record.uri?eid=2-s2.0-105018322020&doi=10.1007%2Fs10278-025-01701-5&partnerID=40&md5=55f4200ffc7d8f7e9cc5133f0f0dfc44	U-Swing: An Adaptive U-Net and Swin Fusion for WB-MRI Whole Spine Bone Marrow Segmentation	10.1007/s10278-025-01701-5	2025	Botis, G.G. and Vagenas, T.P. and Koutoulidis, V. and Moulopoulos, L.A. and Matsopoulos, G.K.	Greece	Biomedical Engineering Laboratory, School of Electrical and Computer Engineering, National Technical University of Athens, 15773, Zografou, Greece	6	3	Retrospective study	Journal of Imaging Informatics in Medicine	Axial Spondyloarthritis;Inflammation;Machine Learning;Magnetic Resonance Imaging;C reactive protein;HLA B27 antigen;nonsteroid antiinflammatory agent;adult;Article;Assessment of SpondyloArthritis international Society Health Index;axial spondyloarthritis;Bath ankylosing spondylitis disease activity index;body mass;cohort analysis;controlled study;deep learning;diagnostic test accuracy study;disea…	0	1	2	5	6	2	2	HD95 - ASSD	N	N	M
https://www.scopus.com/inward/record.uri?eid=2-s2.0-105016797590&doi=10.3389%2Ffbioe.2025.1626299&partnerID=40&md5=0d4d880d7762418aa4206715b6cdc8f4	Enhancing LDD diagnosis with YOLOv9-AID: simultaneous detection of pfirrmann grading, disc herniation, HIZ, and Schmorl‚Äôs nodules	10.3389/fbioe.2025.1626299	2025	Xiang, E. and Zou, Y. and Chen, J. and Peng, J. and Huang, C. and Li, F. and Li, X. and Qin, S. and Li, Z. and Li, N. and Zhou, X. and Zhang, M.	China	Department of Radiology, The First Affiliated Hospital of Jishou University, Jishou, China & College of Communication Engineering, Jilin University, Changchun, China	12	6	Retrospective study	Frontiers in Bioengineering and Biotechnology	classification;deep learning;intervertebral disc herniation;magnetic resonance imaging;accuracy;adult;aged;Article;controlled study;deep learning;diagnostic test accuracy study;entropy;female;human;lumbar disk hernia;major clinical study;male;middle aged;nuclear magnetic resonance imaging;receiver operating characteristic;sensitivity and specificity;spine surgery;training;validation process;diagn…	1	0	1	3	6	2	4 - 6 - 9	mAP - Frames Per Second (FPS)	N	N	R
https://www.scopus.com/inward/record.uri?eid=2-s2.0-105015062390&doi=10.1007%2Fs00586-025-09305-x&partnerID=40&md5=3582a03518c7e654cc37e42fe57666ad	Application and assessment of deep learning to routine 2D T2 FLEX spine imaging at 1.5T	10.1007/s00586-025-09305-x	2025	Shaikh, I.S. and Milshteyn, E. and Chulsky, S. and MacLellan, C.J. and Soman, S.	USA	Beth Israel Deaconess Medical Center, Harvard Medical School, Boston, USA	5	4	Retrospective study	European Spine Journal	Bone marrow segmentation;Deep learning;Feature fusion;Hybrid architecture;Multiple myeloma (MM);U-Swing model;Whole-body MRI (WB-MRI);Automation;Bone;Computer software;Diagnosis;Diseases;Image enhancement;Image segmentation;Ionizing radiation;Magnetic resonance imaging;Oncology;Radiotherapy;Textures;Bone marrow;Bone marrow segmentation;Deep learning;Features fusions;Hybrid architectures;Multiple …	0	5	9	1 - 3	1	1	N/A	SNR - Total Variation - Number of edges - Fat Fraction - Fleiss’ Kappa - Global Number of Edges - Diagnostic Preference Score	N	N	R
https://www.scopus.com/inward/record.uri?eid=2-s2.0-105011503463&doi=10.1016%2Fj.bas.2025.104328&partnerID=40&md5=c84f30addd3cfca743dd0281aca65bab	Deep learning-based prediction of rheumatoid arthritis-associated deformity on MRI	10.1016/j.bas.2025.104328	2025	Lebouille-Veldman, A.B. and Yearley, A.G. and Smith, T.R. and Rana, A. and Vleggeert-Lankamp, C.L.A.	USA + the Netherlands	Computational Neuroscience Outcomes Center (CNOC), Department of Neurosurgery, Brigham and Women's Hospital, Harvard Medical School, Boston, MA, USA & Department of Neurosurgery, Leiden University Medical Center, Leiden, the Netherlands	5	3	Retrospective study	Brain and Spine	deep learning;intelligent diagnosis;lumbar intervertebral disc degeneration;MRI images;YOLO model;Deep learning;Diagnosis;Feature extraction;Grading;Medical imaging;Statistical tests;Tumors;Generalisation;Intelligent diagnosis;Inter-vertebral disc degeneration;Lumbar intervertebral disc;Lumbar intervertebral disk degeneration;MRI Image;Spatial channels;Test sets;YOLO model;Magnetic resonance imag…	0	4	5	1	1	0	1 - 3 - 4 - 5 - 6	NPV	N	N	R
https://www.scopus.com/inward/record.uri?eid=2-s2.0-105011050547&doi=10.1007%2Fs00330-025-11827-3&partnerID=40&md5=f3ad83d200d6ba13e3a25ef5ee41a022	Diagnostic interchangeability of deep-learning based Synth-STIR images generated from T1 and T2 weighted spine images	10.1007/s00330-025-11827-3	2025	Li, J. and Xu, M. and Jiang, B. and Dong, Q. and Xia, Y. and Zhou, T. and Lin, X. and Ma, Y. and Jiang, S. and Zhang, Z. and Xiang, L. and Fan, L. and Liu, S.	China	Department of Radiology, Second Affiliated Hospital of Naval Medical University, Shanghai, The People's Republic of China & College of Health Sciences and Engineering, University of Shanghai for Science and Technology, Shanghai, The People's Republic of China	13	5	Prospective study	European Radiology	Artificial Intelligence;Deep Learning;Image quality;Medical Imaging;MRI;Spine Imaging	1	5	1	1 - 3	1	3	N/A	SNR - CNR - IEI - McNemar test - Fleiss’ Kappa (κ) - Kendall’s Tau (τ) - Kendall’s W - likert scale	N	N	R
https://www.scopus.com/inward/record.uri?eid=2-s2.0-105009140301&doi=10.1097%2FBRS.0000000000005435&partnerID=40&md5=21ab7f41839dd35ef763ff8d71d42474	Robust Radiomic Signatures of Intervertebral Disc Degeneration from MRI	10.1097/BRS.0000000000005435	2025	McSweeney, T. and Tiulpin, A. and Kowlagi, N. and M√§√§tt√§, J. and Karppinen, J. and Saarakkala, S.	Finland	Research Unit of Health Sciences and Technology, University of Oulu, Oulu, Finland	6	4	Retrospective analysis	Spine	Artificial intelligence;Atlantoaxial subluxation;Cervical spine deformity;Deep learning;Prediction model;Rheumatoid arthritis;Subaxial subluxation;adult;Article;atlantoaxial subluxation;cervical spine;controlled study;deep learning;diagnostic accuracy;diagnostic test accuracy study;disease association;disease risk assessment;female;follow up;human;learning algorithm;major clinical study;male;nucl…	1	1	1	3	1	2	1 - 2 - 3 - 4 - 9	Balanced Accuracy - Cohen’s kappa - ICC - QW κ - Lin’s CCC - HD95 - Spearman correlation	N	Y	R
https://www.scopus.com/inward/record.uri?eid=2-s2.0-105004693358&doi=10.1007%2Fs00330-025-11644-8&partnerID=40&md5=f269357ff1bf4aaee2feade398e10944	Radiological evaluation and clinical implications of deep learning- and MRI-based synthetic CT for the assessment of cervical spine injuries	10.1007/s00330-025-11644-8	2025	Fischer, G. and Schl√∂sser, T.P.C. and Dietrich, T.J. and Kim, O.C.-H. and Zdravkovic, V. and Martens, B. and Fehlings, M.G. and Jans, L. and Vereecke, E. and Stienen, M.N. and Hejrati, N.	Switzerland	Department of Neurosurgery, Cantonal Hospital of St.Gallen, St.Gallen, Switzerland & Spine Center of Eastern Switzerland, Cantonal Hospital of St.Gallen, St.Gallen, Switzerland	11	9	Prospective, multicenter study	European Radiology	Interchangeability;Magnetic resonance imaging;Spine;Synthetic STIR	2	8	3	1	1	3	3 - 5 - 7	Fleiss’ Kappa - ICC - MACD	N	N	M
https://www.scopus.com/inward/record.uri?eid=2-s2.0-105003204106&doi=10.1007%2Fs00586-025-08873-2&partnerID=40&md5=14c20fe4c6caa747bba171f31ade5593	A multimodal machine learning model integrating clinical and MRI data for predicting neurological outcomes following surgical treatment for cervical spinal cord injury	10.1007/s00586-025-08873-2	2025	Shimizu, T. and Inomata, K. and Suda, K. and Matsumoto-Harmon, S. and Komatsu, M. and Ota, M. and Ushirozako, H. and Minami, A. and Maki, S. and Endo, T. and Yamada, K. and Iwasaki, N. and Takahashi, H. and Yamazaki, M. and Koda, M.	Japan	Hokkaido Spinal Cord Injury Center, Hokkaido, Japan & University of Tsukuba, Tsukuba, Japan	15	6	Retrospective study	European Spine Journal	deep learning;intervertebral disc degeneration;low back pain;lumbar spine;magnetic resonance imaging;radiomics;texture analysis	0	4	3	1	1	2	1 - 3 - 5 - 6	N/A	N	N	C
https://www.scopus.com/inward/record.uri?eid=2-s2.0-105000400424&doi=10.1504%2FIJMEI.2025.145040&partnerID=40&md5=8a94b91f97d25ee0bc5904dc5c7f0c23	Segmentation of the human spinal cord using U-Net architecture	10.1504/IJMEI.2025.145040	2025	Kumarganesh, S. and Hussain, M. and Shaheen, H. and Anthoniraj, S. and Somaskandan, M. and Sivakumaran, C.	India	Knowledge Institute of Technology, Salem, Tamilnadu, India	6	5	Retrospective study	International Journal of Medical Engineering and Informatics	Cervical spine injuries;CT;Deep learning;Fractures;sCT	0	1	2	6	1	2	3 - 5	Processing time per image	N	N	R
https://www.scopus.com/inward/record.uri?eid=2-s2.0-85211611262&doi=10.1055%2Fs-0044-1779317&partnerID=40&md5=9d9d4b72572335e4bc061bc60ed78634	Convolutional Neural Networks in the Diagnosis of Cervical Myelopathy	10.1055/s-0044-1779317	2024	Korkmaz, M. and Yllmaz, H. and Korkmaz, M.D. and Akg√ºl, T.	Turkey	Departamento de Ortopedia e Traumatologia, Istanbul Faculty of Medicine, Istanbul University, Istambul, Turquia	4	3	Cross-sectional descriptive analytical study	Revista Brasileira de Ortopedia	Cervical spinal cord injury;Deep learning;Machine learning;Multimodal prediction model;Neurological outcomes;adult;aged;cervical spinal cord;cervical vertebra;decompression surgery;diagnostic imaging;female;human;injury;machine learning;male;middle aged;nuclear magnetic resonance imaging;prognosis;retrospective study;spinal cord injury;spine fusion;surgery;treatment outcome;Adult;Aged;Cervical Co…	0	2	1	1	1	1	1 - 3 - 4 - 5 - 6	MCC - Cohen's kappa - FNR	N	N	R
https://www.scopus.com/inward/record.uri?eid=2-s2.0-85214381689&doi=10.20517%2Fais.2024.40&partnerID=40&md5=9a2fc359d0b58dc8e6419cd1ca48ebe0	Pseudarthrosis following adult spinal deformity surgery may be predicted with preoperative MRI adipose tissue features: an artificial intelligence study on raw 3D imaging	10.20517/ais.2024.40	2024	Johnson, G.W. and Chanbour, H. and Doss, D.J. and Makhoul, G.S. and Abtahi, A.M. and Stephens, B.F. and Zuckerman, S.L.	USA	Department of Biomedical Engineering, Vanderbilt University, Nashville, TN 37212, USA	7	3	Retrospective cohort study	Artificial Intelligence Surgery	bounding box;deep learning;spinal cord segmentation;U-Net architecture;accuracy;algorithm;anisotropic edge preserving diffusion approach;Article;artificial neural network;attention gate model;computer assisted tomography;context encoder network;convolutional neural network;deep learning;dense atrous convolution;diagnostic accuracy;Dice score;human;image analysis;image preprocessing;image segmenta…	0	4	8	2	2	2	5	Youden index	N	N	M
https://www.scopus.com/inward/record.uri?eid=2-s2.0-85209377970&doi=10.1016%2Fj.xnsj.2024.100564&partnerID=40&md5=81b0ef3a35efd777073c61c51199a96d	External validation of SpineNetV2 on a comprehensive set of radiological features for grading lumbosacral disc pathologies	10.1016/j.xnsj.2024.100564	2024	Nigru, A.S. and Benini, S. and Bonetti, M. and Bragaglio, G. and Frigerio, M. and Maffezzoni, F. and Leonardi, R.	Italy	Department of Information Engineering, University of Brescia, via Branze 38, Brescia 25123, Italy & Department of Clinical and Experimental Sciences, University of Brescia, Viale Europa, 11, Brescia 25123, Italy	7	4	Retrospective analysis	North American Spine Society Journal	artificial neural networks;cervical vertebrae;deep learning;magnetic resonance imaging;myelopathy	0	2	1	4	1	1	3 - 4 - 5 - 6	balanced accuracy - MCC - Brier Score Loss - Lin's CCC - Cohen's kappa	N	Y	R
https://www.scopus.com/inward/record.uri?eid=2-s2.0-85205710205&doi=10.1016%2Fj.crad.2024.09.004&partnerID=40&md5=a3de7480c9722b3eef1dc4cda31851af	Deep learning constrained compressed sensing reconstruction improves high-resolution three-dimensional (3D) T2-weighted turbo spin echo magnetic resonance imaging (MRI) of the lumbar spine	10.1016/j.crad.2024.09.004	2024	Sartoretti, E. and Sartoretti, T. and Bertulli, L. and Golshani, S. and Alfieri, A. and Hoh, T. and Maurer, A. and Mannil, M. and Binkert, C.A. and Sartoretti-Schefer, S.	Switzerland	Institute of Radiology, Kantonsspital Winterthur, Brauerstrasse 15, 8401 Winterthur, Switzerland; University of Zürich, Zürich, Switzerland	10	10	Prospective study	Clinical Radiology	Adult spinal deformity;artificial intelligence;deep learning;machine learning;magnetic resonance imaging;pseudarthrosis	2	5	1	3	1	2	N/A	Krippendorff's α - Likert-scale image quality scores (subjective grading)	N	N	R
https://www.scopus.com/inward/record.uri?eid=2-s2.0-85197542432&doi=10.1007%2Fs11517-024-03161-5&partnerID=40&md5=0b1765fd6a5a4a3d5f40840484bf828e	Enhanced deep leaning model for detection and grading of lumbar disc herniation from MRI	10.1007/s11517-024-03161-5	2024	Duan, X. and Xiong, H. and Liu, R. and Duan, X. and Yu, H.	China	School of Machinery and Automation, Wuhan University of Science and Technology, Wuhan, 430081, China	5	5	Retrospective study	Medical and Biological Engineering and Computing	AI for Medicine;Disc degeneration;Herniation;Low Back Pain;Spine MRI;SpineNetV2;adult;Article;artificial intelligence;computer assisted tomography;correlation coefficient;deep learning;echography;female;human;intervertebral disk;intervertebral disk degeneration;intervertebral disk hernia;kappa statistics;low back pain;lumbosacral disc pathologies;machine learning;major clinical study;male;nuclear…	1	3	1	3	6	2	6 - 9	mAP - FPS - loss functions	N	N	R
https://www.scopus.com/inward/record.uri?eid=2-s2.0-85188052025&doi=10.1186%2Fs12885-024-12023-0&partnerID=40&md5=da47e963908aa69cc06f6be679c4ae50	Convolutional neural network-based magnetic resonance image differentiation of filum terminale ependymomas from schwannomas	10.1186/s12885-024-12023-0	2024	Gu, Z. and Dai, W. and Chen, J. and Jiang, Q. and Lin, W. and Wang, Q. and Chen, J. and Gu, C. and Li, J. and Ying, G. and Zhu, Y.	China	Department of Neurosurgery, The Second Affiliated Hospital, School of Medicine, Zhejiang University, 88, Jiefang Road, Hangzhou, China & Zhejiang University School of Mathematical Sciences, Hangzhou, Zhejiang, China	11	6	Retrospective study	BMC Cancer	adult;aged;Article;bone marrow;cauda equina;cerebrospinal fluid;convolutional neural network;data consistency;deep learning;female;human;image analysis;image artifact;image noise;image quality;intervertebral disk;intervertebral foramen;iterative reconstruction;Krippendorff's alpha coefficient;low back pain;lumbar disk degeneration;lumbar disk hernia;lumbar spine;major clinical study;male;osteocho…	1	2	2	3	1	2	1 - 3 - 5	Cohen's kappa	N	Y	P
https://www.scopus.com/inward/record.uri?eid=2-s2.0-85183353088&doi=10.1016%2Fj.csbj.2023.12.029&partnerID=40&md5=f998cfeb62ff4764955bb75ab7820240	A novel deep learning method for large-scale analysis of bone marrow adiposity using UK Biobank Dixon MRI data	10.1016/j.csbj.2023.12.029	2024	Morris, D.M. and Wang, C. and Papanastasiou, G. and Gray, C.D. and Xu, W. and Sj√∂str√∂m, S. and Badr, S. and Paccou, J. and Semple, S.I. and MacGillivray, T. and Cawthorn, W.P.	United Kingdom	University of Edinburgh/UK Biobank team	11	9	Retrospective study	Computational and Structural Biotechnology Journal	Deep learning;Lumbar disc herniation;MRI;Target detection;YOLO;Deep learning;Diagnosis;Grading;Image enhancement;Medical imaging;Back pain;Clinical practices;Datapoints;Lumbar disc herniation;Lumbar spines;Targets detection;Test sets;Weight bearing;YOLO;Magnetic resonance imaging;adult;Article;calibration;clinical effectiveness;convolutional neural network;deep learning;detection algorithm;featur…	1	1	9	2026-02-03	2	2	2 - 3	mean, SD, Spearman's, p-value,	N	N	M
https://www.scopus.com/inward/record.uri?eid=2-s2.0-85198843754&doi=10.1097%2FBRS.0000000000005088&partnerID=40&md5=d17c9ddb26316f184626eff04cbf6793	Multimodal Deep Learning-based Radiomics Approach for Predicting Surgical Outcomes in Patients with Cervical Ossification of the Posterior Longitudinal Ligament	10.1097/BRS.0000000000005088	2024	Maki, S. and Furuya, T. and Katsumi, K. and Nakajima, H. and Honjoh, K. and Watanabe, S. and Kaito, T. and Takenaka, S. and Kanie, Y. and Iwasaki, M. and Furuya, M. and Inoue, G. and Miyagi, M. and Ikeda, S. and Imagama, S. and Nakashima, H. and Ito, S. and Takahashi, H. and Kawaguchi, Y. and Futakawa, H. and Murata, K. and Yoshii, T. and Hirai, T. and Koda, M. and Ohtori, S. and Yamazaki, M.	Japan	Chiba University Orthopaedic Surgery	26	13	Retrospective study	Spine	Contrast-enhanced magnetic resonance imaging;Convolutional neural networks;Filum terminale ependymoma;Schwannoma;accuracy;adult;aged;area under the curve;Article;convolutional neural network;deep learning;diagnostic accuracy;diagnostic test accuracy study;ependymoma;female;filum terminale;filum terminale ependymoma;human;image analysis;learning algorithm;machine learning;major clinical study;male…	1	4	1	1	1	0	1 - 3 - 5	p-value, median, IQR, MCID	N	N	M
https://www.scopus.com/inward/record.uri?eid=2-s2.0-85204004655&doi=10.1007%2Fs11768-024-00231-9&partnerID=40&md5=cb6ee4abe0c326f487ec6bd31415a639	Multi-modality hierarchical fusion network for lumbar spine segmentation with magnetic resonance images	10.1007/s11768-024-00231-9	2024	Yan, H. and Zhang, G. and Cui, W. and Yu, Z.	China	School of Medical Information Engineering Guandzhou University of Chinese Medicine	4	4	Retrospective Study	Control Theory and Technology	Ageing;Biomarkers;Bone;Bone marrow adipose tissue;Bone marrow adiposity;Bone marrow fat fraction;Deep learning;Magnetic resonance imaging;Osteoporosis;Predictive analytics;Sex differences;UK Biobank;Bone;Convolutional neural networks;Deep learning;Diseases;Learning systems;Predictive analytics;Volumetric analysis;Adipose tissue;Biobanks;Bone marrow;Bone marrow adipose tissue;Bone marrow adiposity…	1	1	9	3	1	0	2 - 9	Hausdorff Distance	N	N	A
https://www.scopus.com/inward/record.uri?eid=2-s2.0-85202695779&doi=10.1007%2Fs00586-024-08463-8&partnerID=40&md5=f5b7d119055bb53ff07f62e3a0faf0e3	Estimating lumbar bone mineral density from conventional MRI and radiographs with deep learning in spine patients	10.1007/s00586-024-08463-8	2024	Galbusera, F. and Cina, A. and O‚ÄôRiordan, D. and Vitale, J.A. and Loibl, M. and Fekete, T.F. and Kleinstueck, F. and Haschtmann, D. and Mannion, A.F.	Switzerland	Schulthess Clinic and ETH Zurich	9	2	Retrospective study	European Spine Journal	Cervical ossification of the posterior longitudinal ligament (OPLL);deep learning;machine learning;predictive modeling;adult;anterior spine fusion;Article;cervical vertebra;classifier;clinical outcome;confusion matrix;convolutional neural network;cross validation;data accuracy;deep learning;false negative result;false positive result;feature extraction;female;human;image processing;Japanese Ortho…	1	2	1	3	9	2	1 - 3 - 5 - 7	Bland Altman, Pearson's R	N	N	M
https://www.scopus.com/inward/record.uri?eid=2-s2.0-85202507807&doi=10.1007%2Fs00586-024-08464-7&partnerID=40&md5=d15a4504efb009b11ab815851acf3ec9	A deep learning approach for cervical cord injury severity determination through axial and sagittal magnetic resonance imaging segmentation and classification	10.1007/s00586-024-08464-7	2024	Artha Wiguna, I.G.L.N.A. and Kristian, Y. and Deslivia, M.F. and Limantara, R. and Cahyadi, D. and Liando, I.A. and Hamzah, H.A. and Kusuman, K. and Dimitri, D. and Anastasia, M. and Suyasa, I.K.	Indonesia	Department of Orthopaedic Surgery, Udayana University	11	4	Retrospective study	European Spine Journal	Deep learning;Feature fusion;Lumbar spine segmentation;Multi-modality fusion;Fusion reactions;Image enhancement;Image fusion;Image segmentation;Magnetic resonance;Magnetic resonance imaging;Tissue engineering;Automated tissues;Cross modality;Deep learning;Features fusions;Fusion modules;Hierarchical fusions;Lumbar spine segmentation;Lumbar spines;Multi-modality;Multi-modality fusion;Medical imagi…	1	0	3	1	1	3	2 - 9 - 4 - 1	N/A	N	N	R
https://www.scopus.com/inward/record.uri?eid=2-s2.0-85181713326&doi=10.1007%2Fs00586-023-08099-0&partnerID=40&md5=74d3f719f16121181e3d321902ec1172	A deep neural network for MRI spinal inflammation in axial spondyloarthritis	10.1007/s00586-023-08099-0	2024	Lin, Y. and Chan, S.C.W. and Chung, H.Y. and Lee, K.H. and Cao, P.	Hong Kong	Universit of Hong Kong	5	4	Prospective study	European Spine Journal	Bone mineral density;Deep learning;DEXA;Lumbar radiograph;MRI;Opportunistic screening;Osteoporosis;adult;aged;Article;body size;bone density;deep learning;dual energy X ray absorptiometry;female;human;lumbar spine;major clinical study;male;mean absolute error;metadata;nuclear magnetic resonance imaging;osteopenia;osteoporosis;radiomics;spine radiography;T1 weighted imaging;T2 weighted imaging;dia…	1	3	5	5	1	1	1 - 2 - 5	N/A	N	N	R
https://www.scopus.com/inward/record.uri?eid=2-s2.0-85207679978&doi=10.3390%2Fbioengineering11101021&partnerID=40&md5=9174d399bdc247bd7dcbf7d697068484	Convolutional Neural Network Incorporating Multiple Attention Mechanisms for MRI Classification of Lumbar Spinal Stenosis	10.3390/bioengineering11101021	2024	Lin, J. and Zhang, H. and Shang, H.	China	Guagzhou University of Chinese Medicine	3	3	Retrospective study	Bioengineering	Cervical spinal cord injury;Deep learning;Machine learning;MRI classification;Spinal cord injury;Article;calculation;cervical spinal cord injury;cervical spine;clinical article;clinical outcome;computer vision;controlled study;convolutional neural network;data visualization;deep learning;diagnostic accuracy;digital imaging and communications in medicine;disease classification;disease severity;fal…	0	4	1	3	1	2	3 - 4 - 6	N/A	Y	N	R
https://www.scopus.com/inward/record.uri?eid=2-s2.0-85207677598&doi=10.3390%2Fbioengineering11100981&partnerID=40&md5=cf2aace7989fce34bbacc586d34a3726	The Application of Deep Learning to Accurately Identify the Dimensions of Spinal Canal and Intervertebral Foramen as Evaluated by the IoU Index	10.3390/bioengineering11100981	2024	Wu, C.-Y. and Yeh, W.-C. and Chang, S.-M. and Hsu, C.-W. and Lin, Z.-J.	Taiwan	Chang Gung University College of Medicine	5	2	Retrospective study	Bioengineering	Ankylosing spondylitis;Artificial intelligence;Axial spondyloarthritis;Deep learning;Inflammation;MRI;Spine;area under the curve;Article;axial spondyloarthritis;bone marrow edema;cervical spine;cohort analysis;confusion matrix;controlled study;deep neural network;female;health care;human;inflammation;lumbar spine;major clinical study;male;myelitis;nuclear magnetic resonance imaging;radiologist;re…	0	7	9	3	9	2	9	mAP, Std, Loss	N	N	R
https://www.scopus.com/inward/record.uri?eid=2-s2.0-85204599638&doi=10.1002%2Fjsp2.70003&partnerID=40&md5=eef6581cfa923981e7c49452bdc8ee10	Deep learning-based structure segmentation and intramuscular fat annotation on lumbar magnetic resonance imaging	10.1002/jsp2.70003	2024	Xu, Y. and Zheng, S. and Tian, Q. and Kou, Z. and Li, W. and Xie, X. and Wu, X.	China	Zhong Da Hospital, School of Medicine, Southeast University, Nanjing	7	1	Retrospective study	JOR Spine	attention mechanisms;deep learning;lumbar spinal stenosis;medical image analysis	1	0	1	3	9	2	1-2 - 4 - 6	Kappa, MAPE	N	N	M
https://www.scopus.com/inward/record.uri?eid=2-s2.0-85200229689&doi=10.1016%2Fj.jksuci.2024.102148&partnerID=40&md5=bb137a6b6111dc582994c7f719aa5bde	Lumbar intervertebral disc detection and classification with novel deep learning models	10.1016/j.jksuci.2024.102148	2024	Tan, D.S. and Nisar, H. and Yeap, K.H. and Dakulagi, V. and Amin, M.	Malaysia	Tunku Abdul Rahman University (Faculty of Engineering & Green Technology)	5	3	Retrospective classification study	Journal of King Saud University - Computer and Information Sciences	artificial intelligence;deep learning;intervertebral canal;magnetic resonance image;vertebral foramen	1	3	1	3	9	2	1 - 4 - 6 - 3 - 5	Confusion matrix, AP	N	N	R
https://www.scopus.com/inward/record.uri?eid=2-s2.0-85198625139&doi=10.1002%2Fjsp2.1353&partnerID=40&md5=f5f446558d2b04a97b4662bcfa070444	Automated magnetic resonance imaging-based grading of the lumbar intervertebral disc and facet joints	10.1002/jsp2.1353	2024	Nikpasand, M. and Middendorf, J.M. and Ella, V.A. and Jones, K.E. and Ladd, B. and Takahashi, T. and Barocas, V.H. and Ellingson, A.M.	USA	University of Minnesota, Minneapolis	8	7	Retrospective study	JOR Spine	deep learning;fatty infiltration;lumbar disc herniation;paraspinal muscles;segmentation;adult;aged;Article;automation;cohort analysis;comparative study;controlled study;deep learning;female;human;image segmentation;imaging algorithm;intramuscular fat;limb pain;low back pain;lumbar disk hernia;lumbar spine;major clinical study;male;measurement error;measurement precision;nuclear magnetic resonance…	1	4	1	3	1	1	3	Pearson's R, Kappa	N	N	R
https://www.scopus.com/inward/record.uri?eid=2-s2.0-85197701402&doi=10.1007%2Fs11548-024-03219-7&partnerID=40&md5=d4395398777271f9b8761d2845772a68	An intensity-based self-supervised domain adaptation method for intervertebral disc segmentation in magnetic resonance imaging	10.1007/s11548-024-03219-7	2024	Fiorentino, M.C. and Villani, F.P. and Benito-Herce, R. and Ballester, M.A. and Mancini, A. and L√≥pez-Linares Rom√°n, K.	Italy	Università Politecnica delle Marche	6	6	Retrospective study	International Journal of Computer Assisted Radiology and Surgery	AlexNet;Classification;Feature extraction;Lumbar disc;MR images;Novel CNN;ResNet-50;Segmentation;YOLOv2	1	2	1	3	2	2	2 - 5	Hausdorff Distance	N	N	M
https://www.scopus.com/inward/record.uri?eid=2-s2.0-85195862590&doi=10.1016%2Fj.compbiomed.2024.108754&partnerID=40&md5=b32b4633525e39d20783faa213310c40	Semantic contrast with uncertainty-aware pseudo label for lumbar semi-supervised classification	10.1016/j.compbiomed.2024.108754	2024	Hai, J. and Chen, J. and Qiao, K. and Liang, N. and Su, Z. and Lv, H. and Yan, B.	China	Henan Key Laboratory of Imaging and Intelligent Processing, PLA Strategic Support Force Information Engineering University, China	7	2	Retrospective study	Computers in Biology and Medicine	automated grading;deep learning;facet joint;Fujiwara;intervertebral disc;machine learning;Pfirrmann;spine;Article;convolutional neural network;correlation analysis;Fujiwara scale;human;interrater reliability;intervertebral joint;lumbar disk;machine learning;nuclear magnetic resonance imaging;Pfirrmann scale;rating scale	0	2	9	3	1	2	6 - 3 - 4 - 1	AP	Y	N	M
https://www.scopus.com/inward/record.uri?eid=2-s2.0-85188806735&doi=10.1016%2Fj.bspc.2024.106267&partnerID=40&md5=45131c2c9b61ecc99e693569c3df30d9	BUA-Net: Boundary and uncertainty-aware attention network for lumbar multi-region magnetic resonance imaging segmentation	10.1016/j.bspc.2024.106267	2024	Zhou, L. and Liu, Y. and Zhang, Y. and Lin, Z.	China	Key Laboratory of Opto Electric Information Processing, Chinese Academy of Sciences	4	4	Retrospective study	Biomedical Signal Processing and Control	Deep learning;Domain adaptation;Intervertebral disc;Magnetic resonance imaging;adaptation;Article;clinical supervision;contrast enhancement;controlled study;deep learning;diagnostic imaging;Gaussian noise;human;image segmentation;intervertebral disk;magnetic resonance guided high intensity focused ultrasound;nuclear magnetic resonance imaging;performance indicator;prediction;protocol;self evaluat…	0	1	9	3	1	2	2 - 6	ASD, 95HD	Y	N	M
https://www.scopus.com/inward/record.uri?eid=2-s2.0-85147305869&doi=10.1016%2Fj.zemedi.2022.12.004&partnerID=40&md5=28379761049a2293c49838f87109b4b0	Automated shape-independent assessment of the spatial distribution of proton density fat fraction in vertebral bone marrow	10.1016/j.zemedi.2022.12.004	2024	Haueise, T. and Stefan, N. and Schulz, T.J. and Schick, F. and Birkenfeld, A.L. and MacHann, J.	Germany	Section on Experimental Radiology, University Hospital Tübingen	6	4	Retrospective study	Zeitschrift fur Medizinische Physik	Lumbar disc herniation;Semantic contrastive learning;Semi-supervised learning;Uncertainty estimation;Deep learning;Diagnosis;Learning algorithms;Magnetic resonance imaging;Labeled data;Labelings;Lumbar disc herniation;Regularisation;Semantic consistency;Semantic contrastive learning;Semi-supervised learning;Uncertainty;Uncertainty estimation;Unlabeled data;Semantics;Article;confirmation bias;cont…	1	1	0	3	2	2	2 - 5 - 9	Bland Altman, confusion matrix, Hausdorff Distance, volumetric error	N	N	R
https://www.scopus.com/inward/record.uri?eid=2-s2.0-105009931726&doi=10.1162%2Fimag_a_00218&partnerID=40&md5=f73b9b1af8b4b8d840490f6e375a8c09	Automatic segmentation of the spinal cord nerve rootlets	10.1162/imag_a_00218	2024	Valosek, J. and Mathieu, T. and Schlienger, R. and Kowalczyk, O.S. and Cohen-Adad, J.	Canada	Polytechnique Montréal, Institute of Biomedical Engineering & Mila, Quebec AI Institute	5	9	Retrospective study	Imaging Neuroscience	Attention module;Convolutional neural network;Lumbar multi-region segmentation;MRI;Uncertainty-aware;Deep learning;Diagnosis;Learning systems;Magnetic resonance imaging;Attention module;Boundary segmentation;Convolutional neural network;Lumbar multi-region segmentation;Multiregion segmentation;Network boundaries;Network uncertainties;Spinal stenosis;Uncertainty;Uncertainty-aware;Convolutional neu…	1	1	0	6	2	0	2 - 6 - 7	COV, spatial error	Y	N	R
https://www.scopus.com/inward/record.uri?eid=2-s2.0-85197951792&doi=10.14245%2Fns.2448060.030&partnerID=40&md5=35d16ec1cb50ea89551adf9bef511fa6	The Quantitative Evaluation of Automatic Segmentation in Lumbar Magnetic Resonance Images	10.14245/ns.2448060.030	2024	Liang, Y.-W. and Fang, Y.-T. and Lin, T.-C. and Yang, C.-R. and Chang, C.-C. and Chang, H.-K. and Ko, C.-C. and Tu, T.-H. and Fay, L.-Y. and Wu, J.-C. and Huang, W.-C. and Hu, H.-W. and Chen, Y.-Y. and Kuo, C.-H.	Taiwan	Department of Biomedical Engineering, National Yang Ming Chiao Tung University and Neurological Institute, Taipei Veterans General Hospital	14	8	Retrospective study	Neurospine	Bone marrow;CSE MRI;Deep learning;PDFF;Segmentation;Deep learning;Image segmentation;Musculoskeletal system;Bone marrow;CSE MRI;Independent assessment;Proton density;Proton density fat fraction;Segmentation;Size and shape;Vertebral body;Vertebral bone;Spatial distribution;proton;adult;anatomical variation;Article;automation;bone marrow;clinical article;cohort analysis;deep learning;density;female…	1	1	1	3	1	3	2 - 9	N/A	N	N	M
https://www.scopus.com/inward/record.uri?eid=2-s2.0-85192141677&doi=10.11591%2Fijai.v13.i2.pp2131-2142&partnerID=40&md5=e619a257e3ceba144c19134c7bfd2039	Design of a novel deep network model for spinal cord injury prediction	10.11591/ijai.v13.i2.pp2131-2142	2024	Venkatapathi Raju, P.R.S.S. and Asanambigai, V. and Mudunuri, S.B.	India	Department of Computer Science & Engineering, Annamalai University, Dept. of IT, Sagi Rama Krishnam Raju Engineering College	3	2	Retrospective study	IAES International Journal of Artificial Intelligence	deep learning;magnetic resonance imaging;nerve rootlets;segmentation;spinal cord	0	4	1	6	2	2	1 - 3 - 4 - 5 - 6	p value	Y	N	R
https://www.scopus.com/inward/record.uri?eid=2-s2.0-85188729654&doi=10.1016%2Fj.mri.2024.03.022&partnerID=40&md5=f8682688074d66d4dbd585ece9aa8ba2	Comparative analysis of image quality and interchangeability between standard and deep learning-reconstructed T2-weighted spine MRI	10.1016/j.mri.2024.03.022	2024	Lee, S. and Jung, J.-Y. and Chung, H. and Lee, H.-S. and Nickel, D. and Lee, J. and Lee, S.-Y.	Republic of Korea	Catholic University of Korea	7	4	Retrospective study	Magnetic Resonance Imaging	Automatic segmentation;Lumbar spine;Magnetic resonance imaging;Residual U-Net;Spinal stenosis;adult;aged;anatomical concepts;apparent diffusion coefficient;Article;cerebrospinal fluid;cervical spine;deep learning;female;geometry;human;image analysis;image segmentation;intervertebral disk;ligamentum flavum;lumbar magnetic resonance image;lumbar spinal stenosis;lumbar spine;major clinical study;mal…	0	5	1	5	0	1	N/A	p value, K - cohen/Fleiss Kappa, Agreement rate	N	N	R
https://www.scopus.com/inward/record.uri?eid=2-s2.0-85185402513&doi=10.1016%2Fj.bspc.2024.106099&partnerID=40&md5=a04ac9aeb45b389cec8a9a2efa267d5b	Deep learning assisted atlas-based delineation of the skeleton from Whole-Body Diffusion Weighted MRI in patients with malignant bone disease	10.1016/j.bspc.2024.106099	2024	Candito, A. and Holbrey, R. and Ribeiro, A. and Dragan, A. and Messiou, C. and Tunariu, N. and Blackledge, M.D. and Koh, D.-M.	United Kingdom	The Institute of Cancer Research, London; The Royal Marsden NHS Foundation Trust, London	8	2	Retrospective study	Biomedical Signal Processing and Control	Accuracy;Convolutional network;Deep learning;Prediction;Spinal cord injury	1	1	2	5	1	2	2 - 6	ADC, Skeleton Vol difference	Y	N	M
https://www.scopus.com/inward/record.uri?eid=2-s2.0-85192912485&doi=10.1371%2Fjournal.pone.0302067&partnerID=40&md5=85449739893979c2fe3b6dbd7429a446	Lumbar spine MRI annotation with intervertebral disc height and Pfirrmann grade predictions	10.1371/journal.pone.0302067	2024	Natalia, F. and Sudirman, S. and Ruslim, D. and Al-Kafri, A.	Indonesia	Universitas Multimedia Nusantara,	4	4	Retrospective study	PLOS ONE	Acceleration imaging;Deep learning-reconstruction;Noise reduction;Spine MRI;adult;Article;comparative study;confidence interval;deep learning;female;human;image analysis;image quality;image reconstruction;intervertebral disk degeneration;major clinical study;male;noise reduction;prospective study;spinal ganglion;spine;standard;T2 weighted imaging;nuclear magnetic resonance imaging;procedures;Deep…	1	4	1	3	1	0	3 - 9	BFScore, Confusion matrix	Y	N	R
https://www.scopus.com/inward/record.uri?eid=2-s2.0-85190370915&doi=10.1097%2FBRS.0000000000004909&partnerID=40&md5=68f694e1bf170073ce49a3145fab90cb	Semiautomatic Assessment of Facet Tropism From Lumbar Spine MRI Using Deep Learning	10.1097/BRS.0000000000004909	2024	Kowlagi, N. and Kemppainen, A. and Panfilov, E. and McSweeney, T. and Saarakkala, S. and Nevalainen, M. and Niinim√§ki, J. and Karppinen, J. and Tiulpin, A.	Finland	University of Oulu	9	4	Retrospective study	Spine	Deep learning;Metastatic bone disease;Multiple Myeloma;Segmentation;Whole-Body Diffusion Weighted Imaging (WBDWI);Automation;Deep learning;Image segmentation;Magnetic resonance imaging;Musculoskeletal system;Patient treatment;Statistical methods;Surface diffusion;Apparent diffusion coefficient;Atlas based registration;Bone disease;Diffusion weighted imaging;Metastatic bone disease;Multiple myelom…	0	4	1	3	0	1	2 - 9	N/A	N	N	R
https://www.scopus.com/inward/record.uri?eid=2-s2.0-85181980554&doi=10.1016%2Fj.bspc.2024.105943&partnerID=40&md5=f0be27045cf931e29b80a96307ffdeb8	MSFF: An automated multi-scale feature fusion deep learning model for spine fracture segmentation using MRI	10.1016/j.bspc.2024.105943	2024	Saeed, M.U. and Wang, W. and Sheng, J. and Albarakati, H.M. and Dastgir, A.	China	Central South University, Hunan, China	5	2	Retrospective study	Biomedical Signal Processing and Control	algorithm;Article;cervical spine;classifier;computer assisted tomography;cone beam computed tomography;fractional anisotropy;geometry;histogram;human;image analysis;image reconstruction;image retrieval;image segmentation;intervertebral disk;knee;learning algorithm;lumbar spine;lumbar vertebra;machine learning;mathematical analysis;nuclear magnetic resonance imaging;optic disk;prediction;promoter …	0	1	3	5	1	2	2 - 9	N/A	Y	N	R
https://www.scopus.com/inward/record.uri?eid=2-s2.0-85189985461&doi=10.3174%2Fajnr.A8141&partnerID=40&md5=d1b64628f42d5da8fbfa1ae3c91dc553	Automated Detection of Cervical Spinal Stenosis and Cord Compression via Vision Transformer and Rules-Based Classification	10.3174/ajnr.A8141	2024	Payne, D.L. and Xu, X. and Faraji, F. and John, K. and Ferra Pradas, K. and Vishala Bernard, V. and Bangiyev, L. and Prasanna, P.	USA	Stony Brook University Hospital	8	2	Retrospective study	American Journal of Neuroradiology	deep learning;facet asymmetry;facet joints;facet tropism;zygapophyseal joints;adult;Article;cohort analysis;controlled study;cross-sectional study;deep learning;facet tropism;female;human;image processing;interrater reliability;intrarater reliability;lumbar spine;major clinical study;male;population research;radiological parameters;radiologist;retrospective study;scientist;spine radiography;T2 we…	1	4	1	1	5	2	1 - 5 - 6 - 3	N/A	N	N	R
https://www.scopus.com/inward/record.uri?eid=2-s2.0-85189376847&doi=10.1093%2Fbjr%2Ftqae026&partnerID=40&md5=efa6693038d443f8645cb4c058d666da	Clinical efficacy of motion-insensitive imaging technique with deep learning reconstruction to improve image quality in cervical spine MR imaging	10.1093/bjr/tqae026	2024	Song, Y.S. and Lee, I.S. and Hwang, M. and Jang, K. and Wang, X. and Fung, M.	Republic of Korea	British Institute of Radiology	5	1	Retrospective study	British Journal of Radiology	Feature fusion;Medical image analysis;MRI;Spine fracture;Deep learning;Fracture;Image fusion;Image segmentation;Learning systems;Medical imaging;Clinical decision;Features fusions;Learning models;Learning techniques;Machine-learning;Medical image analysis;Multi-scale features;Patient care;Spinal fracture;Spine fractures;Magnetic resonance imaging;accuracy;adult;Article;automation;comparative stud…	0	5	0	1	1	2	N/A	p value	N	N	M
https://www.scopus.com/inward/record.uri?eid=2-s2.0-85189131582&doi=10.1097%2FBSD.0000000000001547&partnerID=40&md5=e7f4c08d7d9bcc70b1009364316dcc1c	A Convolutional Neural Network for Automated Detection of Cervical Ossification of the Posterior Longitudinal Ligament using Magnetic Resonance Imaging	10.1097/BSD.0000000000001547	2024	Qu, Z. and Deng, B. and Sun, W. and Yang, R. and Feng, H.	China	The Affiliated Hospital of Xuzhou Medical University	5	2	Retrospective study	Clinical Spine Surgery	adult;Article;automation;cervical spinal stenosis;cervical spine radiography;cohort analysis;controlled study;convolutional neural network;deep learning;diagnostic accuracy;diagnostic test accuracy study;disease classification;disease severity;female;human;image processing;image segmentation;major clinical study;male;nuclear magnetic resonance imaging;predictive value;receiver operating character…	0	4	9	1	1	3	1 - 3 - 5	confusion matrix	N	N	M
https://www.scopus.com/inward/record.uri?eid=2-s2.0-85185114694&doi=10.1007%2Fs11547-024-01787-x&partnerID=40&md5=58631281a0631688b899802493cd30d3	Deep learning-accelerated image reconstruction in back pain-MRI imaging: reduction of acquisition time and improvement of image quality	10.1007/s11547-024-01787-x	2024	Estler, A. and Hauser, T.-K. and Brunn√©e, M. and Zerweck, L. and Richter, V. and Knoppik, J. and √ñrgel, A. and B√ºrkle, E. and Adib, S.D. and Hengel, H. and Nikolaou, K. and Ernemann, U. and Gohla, G.	Germany	Diagnostic and Interventional Neuroradiology, Department of Radiology, University Hospital Tuebingen	11	6	Retrospective study	Radiologia Medica	deep learning reconstruction;magnetic resonance imaging;noise reduction;PROPELLER;adult;Article;back muscle;cervical spine;clinical article;contrast to noise ratio;controlled study;deep learning;diagnostic imaging;female;human;image analysis;image noise;image quality;image reconstruction;interrater reliability;intrarater reliability;male;motion;noise reduction;nuclear magnetic resonance imaging;q…	0	5	1	3	0	2	N/A	Likert image, K agreement	N	N	R
https://www.scopus.com/inward/record.uri?eid=2-s2.0-85184821096&doi=10.1016%2Fj.wneu.2024.01.035&partnerID=40&md5=bd63ec85361c374598c9fa007fff8d5b	A Deep-Learning Model for Diagnosing Fresh Vertebral Fractures on Magnetic Resonance Images	10.1016/j.wneu.2024.01.035	2024	Wang, Y.-N. and Liu, G. and Wang, L. and Chen, C. and Wang, Z. and Zhu, S. and Wan, W.-T. and Weng, Y.-Z. and Lu, W.W. and Li, Z.-Y. and Wang, Z. and Ma, X.-L. and Yang, Q.	China	Tianjin Hospital	13	6	Retrospective study	World Neurosurgery	convolutional neural network;degenerative cervical spinal stenosis;image diagnosis;ossification of the posterior longitudinal ligament;accuracy;adult;area under the curve;Article;artificial intelligence;cohort analysis;computer assisted tomography;convolutional neural network;deep learning;diagnostic accuracy;diagnostic test accuracy study;female;human;image analysis;male;middle aged;nuclear magn…	0	4	3	5	9	0	3 - 5	N/A	N	N	R
https://www.scopus.com/inward/record.uri?eid=2-s2.0-85182441221&doi=10.1007%2Fs11548-023-03056-0&partnerID=40&md5=e482781cbd075647285fe4a51fa93e13	MAIRNet: weakly supervised anatomy-aware multimodal articulated image registration network	10.1007/s11548-023-03056-0	2024	Gao, X. and Zhong, W. and Wang, R. and Heimann, A.F. and Tannast, M. and Zheng, G.	China	Institute of Medical Robotics, Shanghai Jiao Tong University	6	4	Retrospective study	International Journal of Computer Assisted Radiology and Surgery	Acquisition time;Back pain;Deep learning;Deep resolve boost;Image quality;MRI;Spine imaging;artifact;artificial intelligence;deep learning;diagnostic imaging;human;image processing;low back pain;lumbar vertebra;nuclear magnetic resonance imaging;procedures;retrospective study;Artifacts;Artificial Intelligence;Deep Learning;Humans;Image Processing, Computer-Assisted;Low Back Pain;Lumbar Vertebrae;…	1	4	0	5	0	2	2	N/A	P	N	M
https://www.scopus.com/inward/record.uri?eid=2-s2.0-85187265792&doi=10.3390%2Fbioengineering11020130&partnerID=40&md5=d0b9eb24d913ef9c53e330333de3690a	Deep Learning for Delineation of the Spinal Canal in Whole-Body Diffusion-Weighted Imaging: Normalising Inter- and Intra-Patient Intensity Signal in Multi-Centre Datasets	10.3390/bioengineering11020130	2024	Candito, A. and Holbrey, R. and Ribeiro, A. and Messiou, C. and Tunariu, N. and Koh, D.-M. and Blackledge, M.D.	United Kingdom	The Institute of Cancer Research, London, UK	7	2	Retrospective study	Bioengineering	Artificial intelligence;Deep learning;Fresh fracture;Magnetic resonance image;Vertebra detection;adult;Article;clinical effectiveness;controlled study;deep learning;diagnostic accuracy;diagnostic test accuracy study;diagnostic value;disease classification;female;human;information processing;interrater reliability;machine learning;major clinical study;male;nuclear magnetic resonance imaging;orthop…	1	2	0	5	2	1	2 - 6	ADC	Y	N	M
https://www.scopus.com/inward/record.uri?eid=2-s2.0-85183317362&doi=10.1016%2Fj.artmed.2024.102771&partnerID=40&md5=451ec8687cee6d0e6a61a4315f853960	MSEF-Net: Multi-scale edge fusion network for lumbosacral plexus segmentation with MR image	10.1016/j.artmed.2024.102771	2024	Zhao, J. and Sun, L. and Sun, Z. and Zhou, X. and Si, H. and Zhang, D.	China	Nanjing University of Aeronautics and Astronautics	6	4	Retrospective study	Artificial Intelligence in Medicine	CT;Deep learning;MRI;Multimodal articulated image registration;Article;computer assisted tomography;data integration;deformable registration algorithm;femur;fifth lumbar vertebra;fourth lumbar vertebra;image registration;image registration algorithm;implementation science;intermethod comparison;multimodal articulated image registration network;nuclear magnetic resonance imaging;pelvis;performance…	1	1	9	4	1	2	2	ADC, ASD	Y	N	R
https://www.scopus.com/inward/record.uri?eid=2-s2.0-85175256422&doi=10.1016%2Fj.spinee.2023.09.019&partnerID=40&md5=77972b93fe2cdadf5c0812660644f2df	Differentiating spinal pathologies by deep learning approach	10.1016/j.spinee.2023.09.019	2024	Haim, O. and Agur, A. and Gabay, S. and Azolai, L. and Shutan, I. and Chitayat, M. and Katirai, M. and Sadon, S. and Artzi, M. and Lidar, Z.	Israel	Department of Neurosurgery, Tel Aviv Medical Center	10	5	Retrospective study	Spine Journal	deep learning;metastatic bone disease;multiple myeloma;segmentation;Whole-Body Diffusion-Weighted Imaging (WBDWI)	0	4	1	5	0	0	1 - 3 - 4 - 6	N/A	N	N	C
https://www.scopus.com/inward/record.uri?eid=2-s2.0-86000672816&doi=10.14569%2FIJACSA.2024.0151112&partnerID=40&md5=9eb5bf837af1af396b7a8d6f10cc97b5	Automatic Detection of Lumbar Spine Disc Herniation: Using Computer Vision and Artificial Intelligence	10.14569/IJACSA.2024.0151112	2024	Al Masarweh, M. and Oluseyi, O. and Alkafri, A. and Alsmadi, H. and Alwada'n, T.	Saudi Arabia	Dept. of Management Information Systems – King Abdulaziz University (Jeddah, Saudi Arabia) & computing departments (multiple)**	5	4	Retrospective study	International Journal of Advanced Computer Science and Applications	Attention mechanism;Edge information;Lumbosacral plexus;Multi-scale fusion;Segmentation;Computer aided diagnosis;Decoding;Edge detection;Image fusion;Image segmentation;Attention mechanisms;Edge features;Edge fusion;Edge information;Lumbosacral plexus;MR-images;Multi-scale features;Multiscale edge;Multiscale fusion;Segmentation;Magnetic resonance imaging;Article;comparative study;controlled study…	1	3	1	3	1	2	3 - 4 -6	AP	Y	N	M
https://www.scopus.com/inward/record.uri?eid=2-s2.0-85215269951&doi=10.3389%2Ffsurg.2024.1424716&partnerID=40&md5=22737cbba927ca3e13d6ed3c57b6d911	MRI to digital medicine diagnosis: integrating deep learning into clinical decision-making for lumbar degenerative diseases	10.3389/fsurg.2024.1424716	2024	Ke, B. and Ma, W. and Xuan, J. and Liang, Y. and Zhou, L. and Jiang, W. and Lin, J. and Li, G.	China	Guilin People’s Hospital	8	6	Retrospective study	Frontiers in Surgery	Deep Learning;Diagnosis;Machine learning;MRI;Spine;adult;aged;Article;bone biopsy;convolutional neural network;deep learning;diagnostic test accuracy study;differential diagnosis;female;human;human tissue;learning algorithm;major clinical study;male;neurilemoma;nuclear magnetic resonance imaging;preoperative evaluation;retrospective study;spinal cord infection;spinal meningioma;spine cancer;spine…	1	4	1	3	1	1	3 - 5 - 6	mAP, PR curve	N	N	R
https://www.scopus.com/inward/record.uri?eid=2-s2.0-85212842127&doi=10.22603%2Fssrr.2024-0154&partnerID=40&md5=384db944be7a3a1ed1f8b2a2132ba01d	Artificial Intelligence Classification for Detecting and Grading Lumbar Intervertebral Disc Degeneration	10.22603/ssrr.2024-0154	2024	Liawrungrueang, W. and Cholamjiak, W. and Sarasombath, P. and Jitpakdee, K. and Kotheeranurak, V.	Thailand	University of Phayao, School of Medicine, Thailand	6	6	Retrospective study	Spine Surgery and Related Research	artificial intelligence;computer vision;Lumbar Disc Herniation;MASK-RCNN;MR Images;Diagnosis;Diffusion tensor imaging;Image annotation;Image segmentation;Automatic Detection;Ground truth data;Learning approach;Lumbar disc herniation;Lumbar spines;MASK-RCNN;MR-images;MRI Image;Region-of-interest;Regions of interest;Deep neural networks	0	4	1	5	1	0	1 - 3 - 5 - 4	Prediction error	N	N	R
https://www.scopus.com/inward/record.uri?eid=2-s2.0-85212527441&doi=10.3389%2Ffnins.2024.1501972&partnerID=40&md5=84ff0d66b615cbe41dccb597fba98e97	Deep learning models for MRI-based clinical decision support in cervical spine degenerative diseases	10.3389/fnins.2024.1501972	2024	Li, K.-Y. and Lu, Z.-Y. and Tian, Y.-H. and Liu, X.-P. and Zhang, Y.-K. and Qiu, J.-W. and Li, H.-L. and Zhang, Y.-L. and Huang, J.-W. and Ye, H.-B. and Tian, N.-F.	China	Second Affiliated Hospital & Yuying Children’s Hospital of Wenzhou Medical University	11	2	Retrospective study	Frontiers in Neuroscience	clinical decision-making;deep learning;digital medicine diagnosis;lumbar disc herniation;lumbar spondylolisthesis;MRI	0	4	1	1	9	3	N/A	Cohen's k, p value	Y	N	R
https://www.scopus.com/inward/record.uri?eid=2-s2.0-85212098149&doi=10.2147%2FJMDH.S493302&partnerID=40&md5=b75939372f7de403fe1d874f09a5ed1e	Deep-Learning-Based Radiomics to Predict Surgical Risk Factors for Lumbar Disc Herniation in Young Patients: A Multicenter Study	10.2147/JMDH.S493302	2024	Fan, Z. and Wu, T. and Wang, Y. and Jin, Z. and Wang, T. and Li, D.	China	Department of Orthopedics, Shengjing Hospital of China Medical University	6	3	Retrospective study	Journal of Multidisciplinary Healthcare	Artificial Intelligence;Intervertebral Disc Degeneration;Lumbar Spine;Machine Learning;MRI;Pfirrmann Grading;Article;artificial intelligence;cohort analysis;computer vision;deep learning;diagnostic accuracy;diagnostic test accuracy study;human;image quality;lumbar disk degeneration;lumbar spine;major clinical study;prediction error;quality of life;radiologist;retrospective study;sensitivity and s…	0	4	1	3	9	3	1	Calibration curve, decision curve	N	N	M
https://www.scopus.com/inward/record.uri?eid=2-s2.0-85208627211&doi=10.3389%2Ffnins.2024.1473132&partnerID=40&md5=95ed9677206472d80c473c9dd015872f	Perceptual super-resolution in multiple sclerosis MRI	10.3389/fnins.2024.1473132	2024	Giraldo, D.L. and Khan, H. and Pineda, G. and Liang, Z. and Lozano-Castillo, A. and van Wijmeersch, B. and Woodruff, H.C. and Lambin, P. and Romero, E. and Peeters, L.M. and Sijbers, J.	Belgium	imec / University of Antwerp / Hasselt University	10	4	Retrospective study	Frontiers in Neuroscience	cervical spine degenerative diseases;clinical decision;convolutional neural network;deep learning;magnetic resonance imaging;adult;algorithm;Article;binary classification;cervical spine;cervical spine surgery;cervical spondylosis;clinical decision support system;controlled study;convolutional neural network;cross-sectional study;decision making;decision support system;deep learning;degenerative d…	1	7	5	6	9	2	2 - 6	PSNR, SSIM, VIF, FSIM, VSI, HaarPSI, DISTS, Lesion volume error	Y	N	M
https://www.scopus.com/inward/record.uri?eid=2-s2.0-85208291263&doi=10.12688%2Ff1000research.154680.2&partnerID=40&md5=9d08491433e9b3159b8dfe87f18b12d7	Role of Artificial intelligence model in prediction of low back pain using T2 weighted MRI of Lumbar spine	10.12688/f1000research.154680.2	2024	Muhaimil, A. and Pendem, S. and Sampathilla, N. and P S, P. and Nayak, K. and Chadaga, K. and Goswami, A. and M, O.C. and Shirlal, A.	India	Department of Medical Imaging Technology, Manipal College of Health Professions, Manipal Academy of Higher Education, Manipal, India	9	4	Retrospective study	F1000Research	deep learning;lumbar disc herniation;nomogram;radiomics;surgical treatment;young adults;biological marker;lactate dehydrogenase;adult;algorithm;anxiety;area under the curve;Article;artificial intelligence;artificial neural network;biomechanics;body mass;breast carcinoma;calibration;clinical feature;clinical practice;compression fracture;computer assisted tomography;data mining;decision tree;deep …	0	4	1	5	9	2	1 - 3	N/A	Y	N	M
https://www.scopus.com/inward/record.uri?eid=2-s2.0-85205566096&doi=10.3389%2Ffmed.2024.1479187&partnerID=40&md5=ec64e53fa2e74e3d70e36426679cb873	Deep learning-based multimodal image analysis predicts bone cement leakage during percutaneous kyphoplasty: protocol for model development, and validation by prospective and external datasets	10.3389/fmed.2024.1479187	2024	Xi, Y. and Chen, R. and Wang, T. and Zang, L. and Jiao, S. and Xie, T. and Wu, Q. and Wang, A. and Fan, N. and Yuan, S. and Du, P.	China	Department of Orthopedics, Beijing Chaoyang Hospital, Capital Medical University, Beijing, China	11	2	Retrospective study	Frontiers in Medicine	CNN;deep learning;fine-tuning;lesion segmentation;MRI;multiple sclerosis;perceptual loss;super-resolution;biological marker;Article;convolutional neural network;deep learning;entropy;fluid-attenuated inversion recovery imaging;human;image analysis;image segmentation;multiple sclerosis;neuroradiologist;nuclear magnetic resonance imaging;quantitative analysis;signal noise ratio;systematic review;T1…	1	4	0	5	1	0	1 - 3 - 4 - 5 - 6	Confusion matrix, Cohen's kappa, p value	N	N	M
https://www.scopus.com/inward/record.uri?eid=2-s2.0-85198488167&doi=10.3389%2Ffpsyt.2024.1323109&partnerID=40&md5=4d3be5202080ad7653f9acdfe87ec003	DeepRetroMoCo: deep neural network-based retrospective motion correction algorithm for spinal cord functional MRI	10.3389/fpsyt.2024.1323109	2024	Mobarak-Abadi, M. and Mahmoudi-Aznaveh, A. and Dehghani, H. and Zarei, M. and Vahdat, S. and Doyon, J. and Khatibi, A.	Iran	Imec‑Vision Lab, University of Antwerp & University of Birmingham	7	7	Retrospective study	Frontiers in Psychiatry	Deep learning;intervertebral discs;low back pain;lumbar vertebrae;Machine learning;adult;anisotropy;Article;artificial intelligence;artificial neural network;case control study;clinical decision making;controlled study;data mining;decision tree;deep learning;entropy;female;genotyping;human;hydrostatic pressure;image quality;image segmentation;intelligence;interrater reliability;intervertebral dis…	1	5	0	6	1	2	N/A	tSNR, MSE, DVARS, Pearson correlation coefficient	N	N	A
https://www.scopus.com/inward/record.uri?eid=2-s2.0-85196005146&doi=10.13429%2Fj.cnki.cjcr.2024.05.039&partnerID=40&md5=340af66dd1b1ce28057abc39065aee28	Fully automatic classification of lumbar disc degeneration based on deep learning	10.13429/j.cnki.cjcr.2024.05.039	2024	Ding, Z. and Li, H. and Chen, L. and Chen, B. and Sun, H. and Hou, W. and Xia, C.	China	Chinese clinical hospital / university	2	2	Retrospective study	Chinese Journal of Clinical Research	artificial intelligence;bone cement leakage;deep learning;osteoporotic vertebral compression fracture;percutaneous kyphoplasty;adult;Article;bone cement leakage;clinical outcome;clinical protocol;cohort analysis;compression fracture;computer assisted tomography;controlled study;deep learning;health care;human;image analysis;intervertebral disk;kyphoplasty;multidetector computed tomography;multimo…	1	2	0	3	9	2	1 - 2 - 3 - 4 - 5 - 9	N/A	N	N	R
https://www.scopus.com/inward/record.uri?eid=2-s2.0-85195216994&doi=10.2147%2FJMDH.S465002&partnerID=40&md5=c59f234fc92fd5af9f75a3c1c4a7e167	Validation and Feasibility of Ultrafast Cervical Spine MRI Using a Deep Learning-Assisted 3D Iterative Image Enhancement System	10.2147/JMDH.S465002	2024	Yao, H. and Jia, B. and Pan, X. and Sun, J.	China	Department of Radiology, West China Hospital of Sichuan University, Chengdu	4	1	Retrospective study	Journal of Multidisciplinary Healthcare	deep learning;fMRI;motion correction;spinal cord;unsupervised;algorithm;Alzheimer disease;analysis of variance;architecture;Article;BOLD signal;brain cortex;brain stem;cerebrospinal fluid;cervical spinal cord;computer assisted tomography;contrast to noise ratio;convolutional neural network;deep learning;deep neural network;fractional anisotropy;functional magnetic resonance imaging;gray matter;hu…	1	4	0	1	0	2	N/A	Cohen’s Kappa, p-value, SNR, CNR, SSIM, Agreement rate, Confidence intervals	N	N	R
https://www.scopus.com/inward/record.uri?eid=2-s2.0-85189062718&doi=10.3348%2Fkjr.2023.0671&partnerID=40&md5=52644cdc1d733f105875c3fc28474543	Automated Detection and Segmentation of Bone Metastases on Spine MRI Using U-Net: A Multicenter Study	10.3348/kjr.2023.0671	2024	Kim, D.H. and Seo, J. and Lee, J.H. and Jeon, E.-T. and Jeong, D. and Chae, H.D. and Lee, E. and Kang, J.H. and Choi, Y.-H. and Kim, H.J. and Chai, J.W.	Republic of Korea	Department of Radiology, Yonsei University College of Medicine	11	6	Retrospective cross-sectional study	Korean Journal of Radiology	Classification model;Deep learning network;Disc degeneration;Lumbar;Segmentation model;T2WI sagittal image;U-Net model	1	0	2	5	2	3	2 - 5 - 6	N/A	N	N	M
https://www.scopus.com/inward/record.uri?eid=2-s2.0-85183095316&doi=10.3390%2Fdiagnostics14020191&partnerID=40&md5=366f90a30e2146bb2f907b19b7f527dc	Accurate Intervertebral Disc Segmentation Approach Based on Deep Learning	10.3390/diagnostics14020191	2024	Cheng, Y.-K. and Lin, C.-L. and Huang, Y.-C. and Lin, G.-S. and Lian, Z.-Y. and Chuang, C.-H.	China	Department of Neurosurgery, China Medical University Hospital	6	6	Retrospective cross-sectional study	Diagnostics	cervical spine;deep learning;fast imaging;magnetic resonance imaging;adult;aged;Article;computer assisted tomography;contrast to noise ratio;convolutional neural network;deep learning;diffusion weighted imaging;feasibility study;female;human;image enhancement;image quality;intrarater reliability;Likert scale;machine learning;male;nuclear magnetic resonance imaging;quality control;signal noise rat…	1	1	1	3	1	2	3 - 9 - 7	SSIM, Custom Distance metric	Y	N	R
https://www.scopus.com/inward/record.uri?eid=2-s2.0-85179001004&doi=10.1016%2Fj.ibmed.2023.100130&partnerID=40&md5=85a72e4c4facd9535e4a2c0baeab4a6e	Fully automated evaluation of paraspinal muscle morphology and composition in patients with low back pain	10.1016/j.ibmed.2023.100130	2024	Giaccone, P. and D'Antoni, F. and Russo, F. and Volpecina, M. and Mallio, C.A. and Papalia, G.F. and Vadal√†, G. and Denaro, V. and Vollero, L. and Merone, M.	Italy	Department of Radiology/Imaging, Sapienza University of Rome	10	4	Retrospective validation study	Intelligence-Based Medicine	Bone neoplasms;Deep learning;Magnetic resonance imaging;Metastasis;Spine;adult;Article;bone metastasis;bone radiography;computer assisted tomography;controlled study;costovertebral joint;deep learning;diagnostic test accuracy study;female;fracture;human;image analysis;image segmentation;major clinical study;male;middle aged;multicenter study;nuclear magnetic resonance imaging;percutaneous vertebr…	1	2	9	3	1	2	2	SSIM, Custom Distance metric, Jaccard	Y	N	M
https://www.scopus.com/inward/record.uri?eid=2-s2.0-85178088072&doi=10.2174%2F1573405620666230417082855&partnerID=40&md5=0101c1b8c246db7e420c9d55b825ed7d	MLP-Res-Unet: MLPs and Residual Blocks-based U-shaped Network Intervertebral Disc Segmentation of Multi-modal MR Spine Images	10.2174/1573405620666230417082855	2024	Liu, H. and Lu, S. and Zhao, F.	China	School of Computer Science & Technology, Zhejiang University of Technology, Hangzhou, Chin	3	2	Retrospective calidation study	Current Medical Imaging	deep learning;distance transformation;intervertebral disc segmentation;u-net;Article;controlled study;deep learning;human;image analysis;image processing;image segmentation;intervertebral disk;nuclear magnetic resonance imaging;retrospective study	1	4	9	5	1	2	2 - 9	N/A	N	N	M
https://www.scopus.com/inward/record.uri?eid=2-s2.0-85176122087&doi=10.1111%2Fos.13894&partnerID=40&md5=acfddf8ed238771c6024fd93a3acf59c	Automatic Detection and Classification of Modic Changes in MRI Images Using Deep Learning: Intelligent Assisted Diagnosis System	10.1111/os.13894	2024	Liu, G. and Wang, L. and You, S.-N. and Wang, Z. and Zhu, S. and Chen, C. and Ma, X.-L. and Yang, L. and Zhang, S. and Yang, Q.	China	Department of Orthopaedics, The Chinese People’s Liberation Army General Hospital (Beijing, China)	10	3	Retrospective cohort study	Orthopaedic Surgery	Artificial intelligence;Computer vision;Deep learning;Fat infiltrations;Low back pain;Neural networks;adipose tissue;Article;artificial intelligence;body mass;human;image quality;image segmentation;low back pain;lumbar spine;machine learning;morphology;nuclear magnetic resonance imaging;paraspinal muscle;relaxation time;reliability;visual field	1	3	1	3	9	1	3 - 4 -6	Cohen's Kappa	N	N	R
https://www.scopus.com/inward/record.uri?eid=2-s2.0-85174606525&doi=10.1007%2Fs00586-023-07982-0&partnerID=40&md5=2cacfbe8c8b329a2d0133d10b99d1bc0	Cross-sectional area and fat infiltration of the lumbar spine muscles in patients with back disorders: a deep learning-based big data analysis	10.1007/s00586-023-07982-0	2024	Vitale, J.A. and Sconfienza, L.M. and Galbusera, F.	Italy	Policlinico Gemelli / Catholic University of the Sacred Heart, Rome, Italy	3	3	Retrospective cross-sectional study	European Spine Journal	Deep learning;Intervertebral disc segmentation;Medical image segmentation;MR spine images;MRI;Multi-modal imaging;Deep learning;Diagnosis;Image segmentation;Magnetic resonance imaging;Medical imaging;Parameter estimation;Block based;Inter-vertebral disc degeneration;Intervertebral disk;Intervertebral disk segmentation;Magnetic resonance spine image;Medical image segmentation;Multi-modal;Multilaye…	0	4	1	3	1	2	N/A	p value , spearman, mean, SD	N	N	M
https://www.scopus.com/inward/record.uri?eid=2-s2.0-85163324576&doi=10.1007%2Fs00256-023-04390-9&partnerID=40&md5=297bf8c6c47de1582730cd562bb66173	Fast high-quality MRI protocol of the lumbar spine with deep learning-based algorithm: an image quality and scanning time comparison with standard protocol	10.1007/s00256-023-04390-9	2024	Zerunian, M. and Pucciarelli, F. and Caruso, D. and De Santis, D. and Polici, M. and Masci, B. and Nacci, I. and del Gaudio, A. and Argento, G. and Redler, A. and Laghi, A.	Italy	La Sapienza University	11	3	Retrospective cross-sectional study	Skeletal Radiology	End-plate osteochondritis;Magnetic resonance imaging;Modic changes;ResNet18;SSD;accuracy;adult;aged;Article;controlled study;deep learning;diagnostic accuracy;female;human;interrater reliability;major clinical study;male;nuclear magnetic resonance imaging;osteochondritis;performance;performance indicator;physician;recall;residual neural network;retrospective study;standard;middle aged;procedures;…	0	5	0	3	1	2	N/A	Likert scores, K agreement. p-value, SNR, CNR, mean, media, IQR	N	N	R
https://www.scopus.com/inward/record.uri?eid=2-s2.0-85176357458&doi=10.1186%2Fs41747-023-00385-2&partnerID=40&md5=4895a44563f83709f2a318e358806ae0	Denoising diffusion-based MRI to CT image translation enables automated spinal segmentation	10.1186/s41747-023-00385-2	2023	Graf, R. and Schmitt, J. and Schlaeger, S. and M√∂ller, H.K. and Sideri-Lampretsa, V. and Sekuboyina, A. and Krieg, S.M. and Wiestler, B. and Menze, B. and Rueckert, D. and Kirschke, J.S.	Germany	Department of Diagnostic and Interventional Neuroradiology, School of Medicine, Technical University of Munich	11	5	Retrospective cross-sectional study	European Radiology Experimental	Cross-sectional area;Fat infiltration;IMAT;Lumbar muscles;Segmentation;Spine;adolescent;adult;age;Article;back muscle;big data;child;cohort analysis;controlled study;cross sectional area;cross-sectional study;deep learning;deep neural network;erector spinae muscle;fat infiltration;female;human;lumbar disk hernia;lumbar spine;lumbar spine fracture;major clinical study;male;multifidus muscle;muscul…	1	4	9	1 - 2 - 3	9	2	2	PSNR, SSIM, MSE, L1 error, VIFp	Y	Y	M
https://www.scopus.com/inward/record.uri?eid=2-s2.0-85173777141&doi=10.1177%2F02841851231204214&partnerID=40&md5=c4dd1ef96511cf0e32f8f506016e7162	3D multi-scale feature extraction and recalibration network for spinal structure and lesion segmentation	10.1177/02841851231204214	2023	Wang, H. and Chen, Y. and Jiang, T. and Bian, H. and Shen, X.	China	Nanjing University of Aeronautrics and Astronautics	5	2	Retrospective cross-sectional study	Acta Radiologica	Acquisition time;Artificial intelligence;Deep learning;Lumbar spine;Magnetic resonance imaging;adult;article;artificial intelligence;consensus;contrast to noise ratio;controlled study;deep learning;diagnosis;female;human;human experiment;image quality;interrater reliability;Likert scale;lumbar spine;major clinical study;male;nuclear magnetic resonance imaging;qualitative analysis;quantitative ana…	0	4	9	5	2	1	9	N/A	N	N	M
https://www.scopus.com/inward/record.uri?eid=2-s2.0-85173765018&doi=10.1186%2Fs12891-023-06911-y&partnerID=40&md5=d9561d4e6eb95d47f47ef2000b291f19	Clinical and radiomics feature-based outcome analysis in lumbar disc herniation surgery	10.1186/s12891-023-06911-y	2023	Saravi, B. and Zink, A. and √úlk√ºmen, S. and Couillard-Despr√©s, S. and Wollborn, J. and Lang, G. and Hassel, F.	Germany	Department of Orthopedics and Trauma Surgery, Faculty of Medicine, University of Freiburg	7	5	Retrospective cohort study	BMC Musculoskeletal Disorders	Deep learning;Image processing (computer assisted);Magnetic resonance imaging;Spine;Vertebral body;aged;algorithm;Article;computer assisted tomography;deep learning;diffusion;feature extraction;female;human;image analysis;image processing;image quality;image reconstruction;image segmentation;low back pain;male;medical practice;nuclear magnetic resonance imaging;physical model;retrospective study;…	2	4	1	3	0	2	2	mean, SD	N	N	M
https://www.scopus.com/inward/record.uri?eid=2-s2.0-85171279235&doi=10.1186%2Fs12868-023-00818-z&partnerID=40&md5=81d8f1879bc5269f6e9e186a0060a1be	A spine segmentation method based on scene aware fusion network	10.1186/s12868-023-00818-z	2023	Yilizati-Yilihamu, E.E. and Yang, J.-T. and Yang, Z. and Rong, F. and Feng, S.-Q.	China	Department of Orthopaedics, Qilu Hospital of Shandong University	5	2	Retrospective cross-sectional study	BMC Neuroscience	3D semantic segmentation;3D V-Net;atrous convolution;Deep learning;lumbar spine magnetic resonance imaging;SE block;Convolution;Deep neural networks;Diagnosis;Extraction;Hydraulic structures;Magnetic resonance imaging;Semantic Segmentation;Semantics;Wages;3d semantic segmentation;3d V-net;Atrous convolution;Deep learning;Features extraction;Lumbar spine magnetic resonance imaging;Lumbar spines;Mu…	1	4	0	5	1	2	2	Mean dice, mean, SD	Y	N	R
https://www.scopus.com/inward/record.uri?eid=2-s2.0-85165899183&doi=10.1007%2Fs00330-023-09918-0&partnerID=40&md5=fbd243d555a4906ee33d41983c43fa21	Deep learning‚Äìbased reconstruction for acceleration of lumbar spine MRI: a prospective comparison with standard MRI	10.1007/s00330-023-09918-0	2023	Yoo, H. and Yoo, R.-E. and Choi, S.H. and Hwang, I. and Lee, J.Y. and Seo, J.Y. and Koh, S.Y. and Choi, K.S. and Kang, K.M. and Yun, T.J.	Republic of Korea	Department of Radiology, likely Yonsei University	10	4	Retrospective cross-sectional study	European Radiology	Artificial Intelligence;Lumbar disc herniation;Neural networks;Prognosis;Radiomics;Spine;Treatment outcome;C reactive protein;nicotine;adult;aged;alcohol consumption;Article;artificial intelligence;clinical feature;clinical outcome;cross validation;deep learning;diagnostic accuracy;efficient statistical tree neural network;electron spin resonance;feature extraction;female;hospitalization;human;im…	2	5	0	3	0	2	5	SNR, CNR, p values	N	N	R
https://www.scopus.com/inward/record.uri?eid=2-s2.0-85160341664&doi=10.1007%2Fs00256-023-04364-x&partnerID=40&md5=e296d2f32e8cb9698f4e0316db1e674b	Image quality and lesion detectability of deep learning-accelerated T2-weighted Dixon imaging of the cervical spine	10.1007/s00256-023-04364-x	2023	Seo, G. and Lee, S.J. and Park, D.H. and Paeng, S.H. and Koerzdoerfer, G. and Nickel, D. and Sung, J.	Republic of Korea	Department of Radiology Busan Paik Hospital, Injet university college of medicine	7	5	Retrospective cross-sectional study	Skeletal Radiology	3D segmentation;Deep learning;MRI;Spine;Article;computer analysis;deep learning;diagnostic accuracy;image analysis;image processing;image segmentation;information processing;lumbar spine;mathematical computing;mathematical model;nuclear magnetic resonance imaging;radiodiagnosis;spine disease;validation study	1	5	9	1	0	2	N/A	Cohen's Kappa, NU, p-value, mean, SD	N	N	R
https://www.scopus.com/inward/record.uri?eid=2-s2.0-85169414681&doi=10.1016%2Fj.spinee.2023.06.399&partnerID=40&md5=1bb07b36a14c679e3e7ae14e18c7b669	Imaging evaluation of a proposed 3D generative model for MRI to CT translation in the lumbar spine	10.1016/j.spinee.2023.06.399	2023	Roberts, M. and Hinton, G. and Wells, A.J. and Van Der Veken, J. and Bajger, M. and Lee, G. and Liu, Y. and Chong, C. and Poonnoose, S. and Agzarian, M. and To, M.-S.	Australia	School of Computing / Macquarie University	10	7	Retrospective cross-sectional study	Spine Journal	Deep learning;Image reconstruction;Magnetic resonance imaging;Spine;accelerated nuclear magnetic resonance imaging;adult;aged;Article;cauda equina;clinical article;contrast to noise ratio;controlled study;convolutional neural network;deep learning;diagnostic test accuracy study;female;human;image quality;image reconstruction;incidental finding;intermethod comparison;low back pain;lumbar disk dege…	0	4	9	3	4	1	3	Relative Error	N	N	M
https://www.scopus.com/inward/record.uri?eid=2-s2.0-85169029172&doi=10.1007%2Fs00586-023-07909-9&partnerID=40&md5=8e2860bc1c8515934a352c79c185f28c	Deep phenotyping the cervical spine: automatic characterization of cervical degenerative phenotypes based on T2-weighted MRI	10.1007/s00586-023-07909-9	2023	Niemeyer, F. and Galbusera, F. and Tao, Y. and Phillips, F.M. and An, H.S. and Louie, P.K. and Samartzis, D. and Wilke, H.-J.	Germany	University of Ulm, Germany	8	7	Retrospective cross-sectional study	European Spine Journal	Cervical spine magnetic resonance imaging;Deep learning;Deep learning accelerated Dixon imaging;Deep learning acceleration;adult;aged;Article;cervical spine;cervical spine lesion;clinical article;deep learning;deep learning accelerated Dixon imaging;female;human;image quality;intermethod comparison;intervertebral disk hernia;male;radiodiagnosis;radiologist;retrospective study;spinal cord;spinal g…	0	4	1	1	2	0	N/A	Cohen's kappa, Fleiss' Kappa, Intra rate kappa	N	N	R
https://www.scopus.com/inward/record.uri?eid=2-s2.0-85152360465&doi=10.1007%2Fs11042-023-15205-3&partnerID=40&md5=6f97e23bb61f3d7f9a64b7cb076aa3a0	LSS-UNET: Lumbar spinal stenosis semantic segmentation using deep learning	10.1007/s11042-023-15205-3	2023	Altun, ƒ∞. and Altun, S. and Alkan, A.	Turkey	Sütçü İmam University	3	2	Retrospective cross-sectional study	Multimedia Tools and Applications	Artificial intelligence;Classification;Computed tomography;Deep learning;Generative adversarial network;Radiology;Spine;adult;algorithm;Article;artificial intelligence;artificial neural network;clinical article;computer assisted tomography;controlled study;convolutional neural network;deep learning;diagnostic accuracy;digital imaging and communications in medicine;female;health care system;human;…	1	4	9	3	1	2	1 - 9	N/A	Y	N	A
https://www.scopus.com/inward/record.uri?eid=2-s2.0-85169846424&doi=10.1016%2Fj.wneu.2023.07.009&partnerID=40&md5=90dc5f7ef2e4ab2f15574713acd63b46	Lumbar Spinal Canal Segmentation in Cases with Lumbar Stenosis Using Deep-U-Net Ensembles	10.1016/j.wneu.2023.07.009	2023	Laiwalla, A.N. and Ratnaparkhi, A. and Zarrin, D. and Cook, K. and Li, I. and Wilson, B. and Florence, T.J. and Yoo, B. and Salehi, B. and Gaonkar, B. and Beckett, J. and MacYszyn, L.	USA	Weill Cornell Medicine	12	4	Retrospective cross-sectional study	World Neurosurgery	Cervical vertebrae;Classification;Deep learning;Machine learning;Radiology/methods;Spine;adult;aged;Article;cervical spine;classification;deep learning;degenerative disease;female;human;major clinical study;male;osteophyte;phenotype;retrospective study;T2 weighted imaging;cervical vertebra;neck;nuclear magnetic resonance imaging;procedures;radiography;surgery;Cervical Vertebrae;Humans;Magnetic Re…	1	4	1	3	1	1	2	Inter-rater variation, Average surface distance (ASD), Hausdorff distance:	N	N	R
https://www.scopus.com/inward/record.uri?eid=2-s2.0-85169539476&doi=10.1016%2Fj.jbo.2023.100498&partnerID=40&md5=1dd1d1f36453f28e9e2c3ebe4e63fc17	Contrast-enhanced magnetic resonance image segmentation based on improved U-Net and Inception-ResNet in the diagnosis of spinal metastases	10.1016/j.jbo.2023.100498	2023	Wang, H. and Xu, S. and Fang, K.-B. and Dai, Z.-S. and Wei, G.-Z. and Chen, L.-F.	China	Department of Orthopedics, Hospital of Fujian Medical University	6	5	Retrospective cross-sectional study	Journal of Bone Oncology	Lumbar spinal stenosis;Semantic segmentation;U-Net;Biomineralization;Decision support systems;Deep learning;Learning systems;Magnetic resonance imaging;Semantics;Biomedical images;Expert decision support system;Human lives;Learning methods;Lumbar spinal stenose;Lumbar spines;MR-images;Semantic segmentation;Spinal stenosis;U-net;Semantic Segmentation	1	4	2	5	9	2	1 - 2 - 3 - 4 - 6 - 9	PA	N	N	M
https://www.scopus.com/inward/record.uri?eid=2-s2.0-85165667908&doi=10.1016%2Fj.media.2023.102906&partnerID=40&md5=d21252f9afdac399ef22a9cbb72800fe	Attractive deep morphology-aware active contour network for vertebral body contour extraction with extensions to heterogeneous and semi-supervised scenarios	10.1016/j.media.2023.102906	2023	Zhao, S. and Wang, J. and Wang, X. and Wang, Y. and Zheng, H. and Chen, B. and Zeng, A. and Wei, F. and Al-Kindi, S. and Li, S.	China	School of Biomedical Engineering, Shanghai Jiao Tong University	10	6	Retrospective cohort study	Medical Image Analysis	Automated segmentation;Deep learning;Image segmentation;Lumbar stenosis;Spinal canal;adult;aged;algorithm;Article;automation;clinical study;cohort analysis;controlled study;data base;deep learning;diagnostic test accuracy study;error;expert generated segmentation;female;Hausdorff distance;human;image segmentation;lumbar spinal canal segmentation;lumbar spinal stenosis;lumbar spine;machine generat…	0	1	0	5	0	2	2 - 9	Comprehensive Contour Quality (CCQ), Contour Attraction Term (CAT)	P	Y	M
https://www.scopus.com/inward/record.uri?eid=2-s2.0-85160235147&doi=10.1007%2Fs13042-023-01857-y&partnerID=40&md5=b7d1b149c7e22c6d0e2f7e348a8cfcb6	ICUnet++: an Inception-CBAM network based on Unet++ for MR spine image segmentation	10.1007/s13042-023-01857-y	2023	Li, L. and Qin, J. and Lv, L. and Cheng, M. and Wang, B. and Xia, D. and Wang, S.	Egypt	Department of Computer Science, Faculty of Computers & Artificial Intelligence, Mansoura University	5	3	Retrospective cross-sectional study	International Journal of Machine Learning and Cybernetics	CE-MRI;Deep learning;improved U-Net;Inception-ResNet;Radiomics;Spinal tumor;Article;bone tumor;classifier;contrast enhancement;deep learning;diagnostic accuracy;diagnostic test accuracy study;differential diagnosis;human;image segmentation;nuclear magnetic resonance imaging;radiomics;region growing (imaging);residual neural network;spine metastasis	0	2	9	5	1	2	2 - 9	True Positive Rate (TPR), Positive Predictive Value (PPV)	N	N	R
https://www.scopus.com/inward/record.uri?eid=2-s2.0-85150654825&doi=10.1007%2Fs40747-023-00981-0&partnerID=40&md5=7a88f9b5ac9de880360052f2e94daef6	An MRI image automatic diagnosis model for lumbar disc herniation using semi-supervised learning	10.1007/s40747-023-00981-0	2023	Hou, C. and Li, X. and Wang, H. and Zhang, W. and Liu, F. and Liu, D. and Pan, Y.	Saudi Arabia	Department of Computer Science, King Faisal University	6	4	Retrospective cross-sectional study	Complex and Intelligent Systems	Comprehensive contour quality loss;Deep morphology-aware active contours;Heterogeneous data;Semi-supervision;Vertebral body contour extraction;Complex networks;Diagnosis;Extraction;Musculoskeletal system;Semantic Segmentation;Semantics;Active contours;Body contours;Comprehensive contour quality loss;Contour Extraction;Deep morphology-aware active contour;Heterogeneous data;Quality loss;Semi super…	0	4	1	3	0	0	3 - 5 - 1	N/A	N	N	M
https://www.scopus.com/inward/record.uri?eid=2-s2.0-85172216170&doi=10.3390%2Fdiagnostics13182975&partnerID=40&md5=a73e782acaf2645e9e0708c7ba59f91c	Nerve Root Compression Analysis to Find Lumbar Spine Stenosis on MRI Using CNN	10.3390/diagnostics13182975	2023	Shahzadi, T. and Ali, M.U. and Majeed, F. and Sana, M.U. and Mart√≠nez-D√≠az, R.M. and Samad, M.A. and Ashraf, I.	Pakistan	Department of Computer Science, Bahria University	7	6	Retrospective cross-sectional study	Diagnostics	Attention mechanism;Convolutional neural network;Deep learning;MRI;Spine segmentation;Convolution;Convolutional neural networks;Deep learning;Diagnosis;Electric connectors;Image segmentation;Medical imaging;Attention mechanisms;Convolutional neural network;Network models;Network-based;Positive predictive values;Similarity coefficients;Spinal disease;Spine segmentation;True positive rates;Magnetic…	1	2	1	3	1	2	9 - 3 - 6 - 5 - 4	Multievaluation, Cohen’s Kappa score, Learning Rate, Macro Average / Weighted Average	Y	N	M
https://www.scopus.com/inward/record.uri?eid=2-s2.0-85171592482&doi=10.35378%2Fgujs.1116423&partnerID=40&md5=41a5353b7fd2ac62cfd4ee288298e87c	Lumbar Spinal Stenosis Analysis with Deep Learning Based Decision Support Systems	10.35378/gujs.1116423	2023	Altun, S. and Alkan, A.	Turkey	Department of Electrical & Electronics Engineering, Kahramanmaras Sütçü İmam University	2	1	Retrospective cross-sectional study	Gazi University Journal of Science	Computer-aided diagnosis;Deep learning;Lumbar disc herniation;Semi-supervised learning	1	2	1	3	1	2	9	Mean loU, Loss, loU training curve	Y	N	R
https://www.scopus.com/inward/record.uri?eid=2-s2.0-85167786634&doi=10.1016%2Fj.bspc.2023.105311&partnerID=40&md5=e5a871b2c69e32f90f414c49c83f5a4d	Segmentation and classification of intervertebral disc using capsule stacked autoencoder	10.1016/j.bspc.2023.105311	2023	Adibatti, S. and Sudhindra, K.R. and Manisha Shivaram, J.	India	Department of Electronics and Communication Engeneering MS college of Engineering, Bengaluru Karnataka	3	2	Retrospective cross-sectional study	Biomedical Signal Processing and Control	deep learning;image processing;lumbar spine stenosis;magnetic resonance imaging;Article;classification;comparative study;controlled study;convolutional neural network;cross validation;diagnostic accuracy;human;lumbar spinal stenosis;major clinical study;nerve root compression;nuclear magnetic resonance imaging	0	2	0	6	9	2	3 - 6 - 4 - 2	Dice loss, Mean Intersection over Union (mIoU)	Y	N	A
https://www.scopus.com/inward/record.uri?eid=2-s2.0-85166015290&doi=10.1016%2Fj.bspc.2023.105291&partnerID=40&md5=9ab5df9e9f57bb5826d014b3cf579852	Automatic localization and classification of intervertebral disc herniation using hybrid classifier	10.1016/j.bspc.2023.105291	2023	Valarmathi, G. and Devi, S.	India	Department of Computer Science & Engineering, Anna University	2	2	Retrospective study	Biomedical Signal Processing and Control	Deep learning;Image processing;Lumbar spinal stenosis;Semantic segmentation;Unet;Decision support systems;Deep learning;Diagnosis;Hydraulic structures;Learning systems;Magnetic resonance imaging;Semantics;Surgery;Condition;Images processing;Low back;Lumbar spinal stenose;Quality of life;Semantic segmentation;Spinal stenosis;Surgical interventions;Unet;Semantic Segmentation	0	3	1	3	9	2	3 - 6 - 5 - 4	FPR, FNR	Y	N	A
https://www.scopus.com/inward/record.uri?eid=2-s2.0-85159125146&doi=10.1007%2Fs00330-023-09713-x&partnerID=40&md5=0272b95dc20c606043e0bdc73277d2bb	Benign vs malignant vertebral compression fractures with MRI: a comparison between automatic deep learning network and radiologist‚Äôs assessment	10.1007/s00330-023-09713-x	2023	Liu, B. and Jin, Y. and Feng, S. and Yu, H. and Zhang, Y. and Li, Y.	China	Institute of Diagnostic and Interventional Radiology, Shanghai Sixth People’s Hospital, Affiliated to Shanghai Jiao Tong University School of Medicine,	6	3	Retrospective cross-sectional study	European Radiology	Capsule stacked autoencoder;Deep learning;Intervertebral discs;Localization;Segmentation;Computer aided design;Convolutional neural networks;Deep learning;Diagnosis;Image enhancement;Learning systems;Magnetic resonance imaging;Medical imaging;Semantics;Accurate location;Auto encoders;Capsule stacked autoencoder;Intervertebral disk;Learning models;Localisation;Segmentation;Semantic segmentation;Sp…	1	5	2	3	9	1	1 - 3 - 5 - 4	mAP (mean Average Precision)	N	N	M
https://www.scopus.com/inward/record.uri?eid=2-s2.0-85145751369&doi=10.1007%2Fs00256-022-04268-2&partnerID=40&md5=c59af2d26f414031075aaa7c60ca808c	Rapid lumbar MRI protocol using 3D imaging and deep learning reconstruction	10.1007/s00256-022-04268-2	2023	Chazen, J.L. and Tan, E.T. and Fiore, J. and Nguyen, J.T. and Sun, S. and Sneag, D.B.	USA	Department of Radiology, University of California	8	4	Retrospective cross-sectional study	Skeletal Radiology	Deep learning;EAlexNet and EVGG16;Herniation detection;Intervertebral disc;Lumbar spine MRI image;YOLOv2-IVD;Deep learning;Image enhancement;Image segmentation;Magnetic resonance imaging;Enhanced alexnet and enhanced visual geometry group 16;Herniation detection;Horizontal projections;Intervertebral disk;Lumbar spine MRI image;Lumbar spines;MRI Image;You only look once v2-intervertebral disk;Imag…	0	5	0	3	2	1	N/A	Weighted Kappa	N	N	R
https://www.scopus.com/inward/record.uri?eid=2-s2.0-85161311518&doi=10.3390%2Fcancers15112974&partnerID=40&md5=c4e3976d0f375df16c6ee86e022874cb	Prediction of Primary Tumor Sites in Spinal Metastases Using a ResNet-50 Convolutional Neural Network Based on MRI	10.3390/cancers15112974	2023	Liu, K. and Qin, S. and Ning, J. and Xin, P. and Wang, Q. and Chen, Y. and Zhao, W. and Zhang, E. and Lang, N.	China	Department of Radiology, Peking University Third Hospital	9	2	Retrospective cross-sectional study	Cancers	Deep learning;Fractures, compression;Magnetic resonance imaging;Spine;adult;area under the curve;Article;automation;clinical practice;compression fracture;controlled study;deep learning;diagnostic accuracy;diagnostic test accuracy study;female;human;major clinical study;male;middle aged;nuclear magnetic resonance imaging;patient care;radiologist;receiver operating characteristic;sensitivity and s…	1	2	2	5	1	0	1 - 3 - 4 - 5 - 6	N/A	Y	N	P
https://www.scopus.com/inward/record.uri?eid=2-s2.0-85160969705&doi=10.1093%2Fneuonc%2Fnoac280&partnerID=40&md5=54886d243f2ff56d949262d36575a0cb	Deep learning based on preoperative magnetic resonance (MR) images improves the predictive power of survival models in primary spinal cord astrocytomas	10.1093/neuonc/noac280	2023	Sun, T. and Wang, Y. and Liu, X. and Li, Z. and Zhang, J. and Lu, J. and Qu, L. and Haller, S. and Duan, Y. and Zhuo, Z. and Cheng, D. and Xu, X. and Jia, W. and Liu, Y.	China	Zhongnan Hospital	13	6	Retrospective cohort study	Neuro-Oncology	3D imaging;Deep learning;Lumbar spine;MRI;Article;artificial intelligence;bone lesion;clinical article;comparative study;deep learning;diagnostic procedure;health care quality;human;image quality;intraosseous lesion;lumbar spinal stenosis;lumbar spine;lumbar spine fracture;nuclear magnetic resonance imaging;radiologist;retrospective study;T2 weighted imaging;three-dimensional imaging;two-dimensio…	1	4	2	6	9	2	2 - 1	C-index (Concordance index)	N	N	M
https://www.scopus.com/inward/record.uri?eid=2-s2.0-85160969409&doi=10.1097%2FBSD.0000000000001418&partnerID=40&md5=2cb9574a091c657a7be89c2f9b5bd7fd	LSS-VGG16: Diagnosis of Lumbar Spinal Stenosis with Deep Learning	10.1097/BSD.0000000000001418	2023	Altun, S. and Alkan, A. and Altun, ƒ∞.	Turkey	Kahramanmaras Sütçü Imam University	3	2	Retrospective cohort study	Clinical Spine Surgery	convolutional neural network;MRI;spinal metastases;adult;aged;Article;breast cancer;cancer classification;cancer of unknown primary site;cancer patient;controlled study;convolutional neural network;deep learning;diagnostic accuracy;diagnostic test accuracy study;F1 score;feasibility study;female;histopathology;human;human tissue;kidney cancer;lung cancer;major clinical study;male;middle aged;nucl…	1	4	1	3	1	2	3 - 4	ODI/VAS	Y	N	A
https://www.scopus.com/inward/record.uri?eid=2-s2.0-85158135959&doi=10.1016%2Fj.compbiomed.2023.106977&partnerID=40&md5=9af3c780c10c2a6b89e2f2cb00b5f74a	Feature-correlation-aware history-preserving-sparse-coding framework for automatic vertebra recognition	10.1016/j.compbiomed.2023.106977	2023	Zeng, C. and Zhao, S. and Chen, B. and Zeng, A. and Li, S.	China	Department of Artificial Intelligence, Sun Yat-sen University, Guangzhou 510006, China	5	4	Retrospective validation study	Computers in Biology and Medicine	deep learning;overall survival;prediction;spinal cord astrocytomas;adolescent;adult;aged;area under the curve;Article;astrocytoma;cancer survival;child;contrast enhancement;cross validation;deep learning;diagnostic accuracy;female;histopathology;human;major clinical study;male;nuclear magnetic resonance imaging;operation duration;overall survival;prediction;preoperative care;primary tumor;retrosp…	0	2	9	5	0	2	3	mAP (Mean Average Precision), Distance	Y	N	A
https://www.scopus.com/inward/record.uri?eid=2-s2.0-85168995822&doi=10.21037%2Fqims-22-729&partnerID=40&md5=af30071a89c7f4c2b63c882583fbb64b	Deep-learning-based biomarker of spinal cartilage endplate health using ultra-short echo time magnetic resonance imaging	10.21037/qims-22-729	2023	Bonnheim, N.B. and Wang, L. and Lazar, A.A. and Chachad, R. and Zhou, J. and Guo, X. and O‚ÄôNeill, C. and Castellanos, J. and Du, J. and Jang, H. and Krug, R. and Fields, A.J.	USA	Department of Orthopaedic Surgery, California University	12	5	Retrospective cross-sectional study	Quantitative Imaging in Medicine and Surgery	deep learning;image processing;lumbar spinal stenosis;VGG16;accuracy;adult;aged;algorithm;area under the curve;Article;artificial intelligence;artificial neural network;backache;cerebrospinal fluid;cervical spine;classification algorithm;compression;controlled study;decision tree;decompression surgery;deep learning;diagnostic test accuracy study;feeding;female;histogram;human;image processing;ima…	1	4	0	3	1	1	N/A	PR AUC (Area Under the Precision-Recall Curve), Bias	N	N	M
https://www.scopus.com/inward/record.uri?eid=2-s2.0-85149443690&doi=10.1016%2Fj.media.2023.102786&partnerID=40&md5=1d32b3048daa8c9e6d7ae19aba8991d0	SpineRegNet: Spine Registration Network for volumetric MR and CT image by the joint estimation of an affine-elastic deformation field	10.1016/j.media.2023.102786	2023	Zhao, L. and Pang, S. and Chen, Y. and Zhu, X. and Jiang, Z. and Su, Z. and Lu, H. and Zhou, Y. and Feng, Q.	China	School of Biomedical Engineering & affiliated laboratories, Southern Medical University	9	5	Retrospective study	Medical Image Analysis	Deep learning;Feature correlation;Sparse coding;Vertebra recognition;Deep learning;Diagnosis;Musculoskeletal system;Patient treatment;Coding framework;Disease diagnosis;Feature correlation;Field of views;Regularisation;Sparse codes;Sparse coding;Surgical treatment;Vertebra recognition;Magnetic resonance imaging;Article;automation;calculation;conceptual framework;controlled study;deep learning;hum…	1	6	0	1 - 3	0	2	2	Jacobian determinant, TRE, LRC cost	Y	Y	M
https://www.scopus.com/inward/record.uri?eid=2-s2.0-85138321159&doi=10.1007%2Fs10489-022-04118-7&partnerID=40&md5=817e602b06abf074f9a45d0943339d3a	A semantic segmentation model for lumbar MRI images using divergence loss	10.1007/s10489-022-04118-7	2023	Hou, C. and Zhang, W. and Wang, H. and Liu, F. and Liu, D. and Chang, J.	China	Department of AI Sun Yat-sen University	6	2	Retrospective cross-sectional study	Applied Intelligence	Cartilage endplate (CEP);disc degeneration;low back pain;T2* relaxation time;ultra-short echo time magnetic resonance imaging (UTE MRI);adult;aged;Article;cartilage;cohort analysis;contrast to noise ratio;controlled study;convolutional neural network;cross-sectional study;diagnostic accuracy;female;fourth lumbar vertebra;health;human;image quality;image segmentation;low back pain;lumbar spine;maj…	1	1	1	3	1		3 - 9	Pixel accuracy, mean divergence	Y	N	A
https://www.scopus.com/inward/record.uri?eid=2-s2.0-85153941197&doi=10.3390%2Fdiagnostics13081417&partnerID=40&md5=97c876ce076ee4f909719288710e41ca	NAMSTCD: A Novel Augmented Model for Spinal Cord Segmentation and Tumor Classification Using Deep Nets	10.3390/diagnostics13081417	2023	Mohanty, R. and Allabun, S. and Solanki, S.S. and Pani, S.K. and Alqahtani, M.S. and Abbas, M. and Soufiene, B.O.	India	School of Information Systems, ASBM University, Bhubaneswar	7	5	Retrospective cross-sectional study	Diagnostics	Affine-elastic registration;Deep learning;Local rigidity constrain;Spine registration;Computerized tomography;Deep learning;Elastic deformation;Musculoskeletal system;Navigation systems;Rigidity;Surgery;Surgical equipment;Affine-elastic registration;Computed tomography images;Deformation field;Elastic registration;Joint estimation;Local rigidity constrain;Spine registration;Surgical planning;Volu…	1	2	1	5	9	2	3	Segmentation efficiency	Y	N	M
https://www.scopus.com/inward/record.uri?eid=2-s2.0-85140307587&doi=10.1007%2Fs00256-022-04211-5&partnerID=40&md5=140a655bda8321601ac7d0ab4e8f5bd1	Deep-learning-reconstructed high-resolution 3D cervical spine MRI for foraminal stenosis evaluation	10.1007/s00256-022-04211-5	2023	Jardon, M. and Tan, E.T. and Chazen, J.L. and Sahr, M. and Wen, Y. and Schneider, B. and Sneag, D.B.	USA	Departmnet of Radiology and Imaging Hospital for Special Surgery	7	3	Retrospective study	Skeletal Radiology	Artificial intelligence;Computer-aided diagnosis;Deep learning;MRI;Semantic segmentation;Spinal stenosis;Computer aided diagnosis;Computer aided instruction;Deep learning;Geometry;Medical imaging;Pixels;Semantic Segmentation;Semantics;Automatic diagnosis;Diagnostic efficiency;Loss functions;Measurements of;Quantitative metric;Segmentation models;Segmentation results;Semantic segmentation;Spinal s…	2	5	1	1	0	1	N/A	Cohen's kappa, p values, wilconxon test	N	N	M
https://www.scopus.com/inward/record.uri?eid=2-s2.0-85148479578&doi=10.1148%2Fradiol.212922&partnerID=40&md5=d940c4b140c905f37bf08f232f82ca43	Deep Learning Reconstruction for Accelerated Spine MRI: Prospective Analysis of Interchangeability	10.1148/radiol.212922	2023	Almansour, H. and Herrmann, J. and Gassenmaier, S. and Afat, S. and Jacoby, J. and Koerzdoerfer, G. and Nickel, D. and Mostapha, M. and Nadar, M. and Othman, A.E.	USA	Hospital of the University of Pennsylvania, Department of Radiolog	6	2	Prospective cross-sectional study	Radiology	classification;convolutional;cord;mask regions;neural network;segmentation;segments;spinal;tumor;Article;cerebrospinal fluid;clinical classification;controlled study;convolutional neural network;deep learning;entropy;finite element analysis;human;image segmentation;lumbar region;machine learning;recurrent neural network;residual neural network;spinal cord;spinal cord tumor;tumor classification	0	5	1	5	0	1	N/A	Equivalence index, p values, computational time, qualitative assesment (image queality, artifacts, etc)	N	N	M
https://www.scopus.com/inward/record.uri?eid=2-s2.0-85137226213&doi=10.1177%2F02841851221119375&partnerID=40&md5=7a2d1085fa995ff61d704c47c773a2f9	Differentiation of benign and malignant spinal schwannoma using guided attention inference networks on multi-source MRI: comparison with radiomics method and radiologist-based clinical assessment	10.1177/02841851221119375	2023	Cao, J. and Wang, X. and Qiao, Y. and Chen, S. and Wang, P. and Sun, H. and Zhang, L. and Liu, T. and Liu, S.	China	Department of Orthopaedics, Navy Medical University	9	4	Retrospective cross-sectional study	Acta Radiologica	3D MRI;Cervical spine;Deep-learning-based reconstruction;adolescent;adult;aged;Article;cervical spine;clinical article;clinical assessment;comparative study;controlled study;deep learning;female;health care quality;human;image quality;interrater reliability;male;nuclear magnetic resonance imaging;radiologist;reconstruction algorithm;retrospective study;stenosis;T2 weighted imaging;two-dimensional…	1	2	2	5	1	3	1 - 4	ACC, BAC	N	N	R
https://www.scopus.com/inward/record.uri?eid=2-s2.0-85148958624&doi=10.3390%2Fdiagnostics13040663&partnerID=40&md5=e9337777104eac77ebd49a619181627e	Automatic Detection, Classification, and Grading of Lumbar Intervertebral Disc Degeneration Using an Artificial Neural Network Model	10.3390/diagnostics13040663	2023	Liawrungrueang, W. and Kim, P. and Kotheeranurak, V. and Jitpakdee, K. and Sarasombath, P.	Thailand	Department of Orthopaedics, School of Medicine, University of Phayao	5	6	Retrospective cross-sectional study	Diagnostics	adult;age distribution;aged;Article;clinical article;comparative study;deep learning;diagnostic accuracy;female;human;image quality;lumbar disk degeneration;male;nuclear magnetic resonance imaging;prospective study;sex ratio;spine disease;spine radiography;T1 weighted imaging;T2 weighted imaging;turbo spin echo acquisition;diagnostic imaging;middle aged;procedures;spine;time;Deep Learning;Humans;…	0	0	1	3	1	0	3 - 4 - 6 - 9	mAP, AP, Confusion matrix, P–R curve	Y	N	R
https://www.scopus.com/inward/record.uri?eid=2-s2.0-85147805677&doi=10.3390%2Fdiagnostics13030418&partnerID=40&md5=61d1095183141c8d8d3ac4b1a57c8343	Conventional and Deep-Learning-Based Image Reconstructions of Undersampled K-Space Data of the Lumbar Spine Using Compressed Sensing in MRI: A Comparative Study on 20 Subjects	10.3390/diagnostics13030418	2023	Fervers, P. and Zaeske, C. and Rauen, P. and Iuga, A.-I. and Kottlors, J. and Persigehl, T. and Sonnabend, K. and Weiss, K. and Bratke, G.	Germany	Institute for Diagnostic and Interventional Radiology, Faculty of Medicine and University Hospital Cologne	9	2	Prospective study	Diagnostics	artificial intelligence;differential diagnosis;magnetic resonance imaging;radiomics;Schwannoma;Convolutional neural networks;Deep learning;Diagnosis;Learning systems;Neuroimaging;Atypicals;Clinical assessments;Cross validation;Diagnostic markers;Differential diagnosis;Inference network;Learning models;Multi-Sources;Radiomic;Schwannoma;Magnetic resonance imaging;adult;area under the curve;Article;…	1	5	0	3	2	2	8	SSIM, SNR, CNR, Cohen's Kappa, p value	Y	N	M
https://www.scopus.com/inward/record.uri?eid=2-s2.0-85143490998&doi=10.1016%2Fj.ijleo.2022.170277&partnerID=40&md5=37a098f7c77f46b6a0f662543d2ddb28	MLKCA-Unet: Multiscale large-kernel convolution and attention in Unet for spine MRI segmentation	10.1016/j.ijleo.2022.170277	2023	Wang, B. and Qin, J. and Lv, L. and Cheng, M. and Li, L. and Xia, D. and Wang, S.	China	School of Electrical and Information Engineering, Tianjin University of Technology	7	1	Retrospective study	Optik	automation model;computer neural network;deep learning;diagnostic performance;intervertebral disc degenerations;lumbar spine;MRI;adult;Article;artificial neural network;computer assisted diagnosis;controlled study;convolutional neural network;deep learning;diagnostic value;disease classification;disease severity assessment;female;human;image analysis;image processing;image segmentation;interverte…	0	1	9	5	1	2	2 - 9 - 6	TPR, PPV, ET	Y	N	A
https://www.scopus.com/inward/record.uri?eid=2-s2.0-85171529259&doi=10.3389%2Ffbioe.2023.1244291&partnerID=40&md5=d5ad76a395ddc323daa412df9262ac97	Automatic generation of subject-specific finite element models of the spine from magnetic resonance images	10.3389/fbioe.2023.1244291	2023	Kok, J. and Shcherbakova, Y.M. and Schl√∂sser, T.P.C. and Seevinck, P.R. and van der Velden, T.A. and Castelein, R.M. and Ito, K. and Van-Rietbergen, B.	Netherlands	Department of Biomedical Engineering, University of Technology, Eindhoven	8	4	Retrospective cross-sectional study	Frontiers in Bioengineering and Biotechnology	artificial intelligence;computer-assisted;image processing;magnetic resonance imaging;adult;Article;artificial intelligence;computer aided design;contrast to noise ratio;controlled clinical trial;controlled study;deep learning;female;human;human experiment;image analysis;image processing;image quality;image reconstruction;iterative reconstruction;lumbar spine;male;normal human;nuclear magnetic re…	1	0	9	5	2	1	2	mean distance error, Mesh quality	N	N	M
https://www.scopus.com/inward/record.uri?eid=2-s2.0-85164594950&doi=10.2147%2FIDR.S417663&partnerID=40&md5=be017af5f6064df0babc7b7312b94f8c	Accurate Differentiation of Spinal Tuberculosis and Spinal Metastases Using MR-Based Deep Learning Algorithms	10.2147/IDR.S417663	2023	Duan, S. and Dong, W. and Hua, Y. and Zheng, Y. and Ren, Z. and Cao, G. and Wu, F. and Rong, T. and Liu, B.	China	Department of Orthopaedic Surgery, Beijing Tiantan Hospital	9	6	Retrospective cohort study	Infection and Drug Resistance	Attention;Deep learning;Multiscale large-kernel convolution;Receptive fields;Spine segmentation;Convolution;Deep learning;Diagnosis;Magnetic resonance imaging;Medical imaging;Attention;Convolution kernel;Feature map;Kernel convolution;Medical image segmentation;MRI segmentation;Multiscale large-kernel convolution;Receptive fields;Spine segmentation;Image segmentation	1	4	5	5	9	0	3 - 4 - 1	N/A	N	N	M
https://www.scopus.com/inward/record.uri?eid=2-s2.0-85150265358&doi=10.14744%2Fejmo.2023.59207&partnerID=40&md5=6e165f072f8a23d8e087bdbd4a342edf	Clinical Assessment of CoLumbo Deep Learning System for Central Canal Stenosis Diagnostics	10.14744/ejmo.2023.59207	2023	Georgiev, R. and Novakova, M. and Bliznakova, K.	Bulgaria	Department of Imaging Diagnostics, Interventional Radiology and Radiotherapy, Medical University, Varna, Bulgaria	3	3	Prospective study	Eurasian Journal of Medicine and Oncology	Deep learning;Diagnostic performance;Fast imaging;Lumbar spine;Magnetic resonance imaging;adult;aged;Article;axial T2 weighted sequence;clinical protocol;confidence interval;controlled study;deep learning;denoising autoencoder;diagnostic imaging;diagnostic performance;diagnostic value;fast imaging;female;human;image analysis;image reconstruction;interrater reliability;intrarater reliability;kappa…	0	4	1	3	1	3	5	N/A	N	N	M
https://www.scopus.com/inward/record.uri?eid=2-s2.0-85149860588&doi=10.3389%2Ffpubh.2023.1044525&partnerID=40&md5=d932e7e5cb9edc1d36870f0ce2673e91	Spinal disease diagnosis assistant based on MRI images using deep transfer learning methods	10.3389/fpubh.2023.1044525	2023	Xuan, J. and Ke, B. and Ma, W. and Liang, Y. and Hu, W.	China	Guangxi Key Laboratory of Multi-Source Information Mining and Security, Guangxi Normal University	5	3	Retrospective study	Frontiers in Public Health	deep-learning;intervertebral disc;mesh morphing;personalized medicine;synthetic computed tomography;vertebra;Computerized tomography;Deep learning;Finite element method;Image segmentation;Learning systems;Magnetic resonance imaging;Mesh generation;Musculoskeletal system;Automatic segmentations;Computed tomography images;Deep-learning;Finite element modelling (FEM);Intervertebral disk;Mesh morphin…	1	4	1	3	1	3	3 - 6 - 5	mAP, AP, p value	N	N	M
https://www.scopus.com/inward/record.uri?eid=2-s2.0-85141405616&doi=10.1007%2Fs11548-022-02783-0&partnerID=40&md5=6135614d3b42f19f0228c9c72270774c	Magnetic resonance image segmentation of the compressed spinal cord in patients with degenerative cervical myelopathy using convolutional neural networks	10.1007/s11548-022-02783-0	2023	Nozawa, K. and Maki, S. and Furuya, T. and Okimatsu, S. and Inoue, T. and Yunde, A. and Miura, M. and Shiratani, Y. and Shiga, Y. and Inage, K. and Eguchi, Y. and Ohtori, S. and Orita, S.	Japan	Department of Medical Engineering, Graduate School of Science and Engineering, Chiba University	13	3	Retrospective study	International Journal of Computer Assisted Radiology and Surgery	artificial intelligence;deep learning;magnetic resonance imaging;spinal metastases;spinal tuberculosis;adult;aged;Article;artificial intelligence;confusion matrix;deep learning;diagnostic accuracy;diagnostic test accuracy study;diagnostic value;differential diagnosis;female;histopathology;human;human tissue;internal validity;major clinical study;male;middle aged;nuclear magnetic resonance imaging…	1	1	1	1	1	1	2	Spearman correlation, p value	N	N	M
https://www.scopus.com/inward/record.uri?eid=2-s2.0-85138180191&doi=10.1002%2Fima.22807&partnerID=40&md5=c5928e1a5d16abca47298b9039369cf2	LSS-net: 3-dimensional segmentation of the spinal canal for the diagnosis of lumbar spinal stenosis	10.1002/ima.22807	2023	Altun, S. and Alkan, A.	Turkey	Department of Electrical and Electronics Engeneering Kahramanmaras Sutcu imam University	2	1	Retrospective study	International Journal of Imaging Systems and Technology	CoLumbo software;deep learning;Dural Sac;lumbar levels;lumbar spinal stenosis;adult;Article;backache;clinical assessment;clinical trial;deep learning;diagnostic test accuracy study;female;human;interrater reliability;leg pain;lumbar spinal stenosis;lumbar spine;major clinical study;male;nuclear magnetic resonance imaging;predictive value;radiologist;sensitivity and specificity	1	1	1	3	2	0	9	Relative error	N	N	A
https://www.scopus.com/inward/record.uri?eid=2-s2.0-85144256445&doi=10.3389%2Ffphys.2022.1081441&partnerID=40&md5=2f7c228786a37e96bc0dd418e43985cb	SeUneter: Channel attentive U-Net for instance segmentation of the cervical spine MRI medical image	10.3389/fphys.2022.1081441	2022	Zhang, X. and Yang, Y. and Shen, Y.-W. and Li, P. and Zhong, Y. and Zhou, J. and Zhang, K.-R. and Shen, C.-Y. and Li, Y. and Zhang, M.-F. and Pan, L.-H. and Ma, L.-T. and Liu, H.	China	Orthopedic Research Institute, West China Hospital, Sichuan University	13	3	Retrospective study	Frontiers in Physiology	assisting doctor diagnosis;deep transfer learning;image annotation;magnetic resonance image (MRI);object detection;spinal diseases;artificial intelligence;human;nuclear magnetic resonance imaging;procedures;spine;spine disease;Artificial Intelligence;Deep Learning;Humans;Magnetic Resonance Imaging;Spinal Diseases;Spine	1	1	1	1	1	2	2 - 9	mloU, mDice	P	N	R
https://www.scopus.com/inward/record.uri?eid=2-s2.0-85143975979&doi=10.1148%2Fryai.210292&partnerID=40&md5=30ee4c93879a51784b664fb2b5a02c6e	Automated Classification of Intramedullary Spinal Cord Tumors and Inflammatory Demyelinating Lesions Using Deep Learning	10.1148/ryai.210292	2022	Zhuo, Z. and Zhang, J. and Duan, Y. and Qu, L. and Feng, C. and Huang, X. and Cheng, D. and Xu, X. and Sun, T. and Li, Z. and Guo, X. and Gong, X. and Wang, Y. and Jia, W. and Tian, D. and Zhan, X. and Shi, F. and Haller, S. and Barkhof, F. and Ye, C. and Liu, Y.	China	Beijing Tiantan Hospital, Capital Medical University	21	9	Retrospective + prospective	Radiology: Artificial Intelligence	Cervical spondylotic myelopathy;Deep learning;Degenerative cervical myelopathy;Ossification of the posterior longitudinal ligament;Segmentation;Spinal cord;aged;Article;bladder function;cervical spondylotic myelopathy;cohort analysis;computer language;controlled study;convolutional neural network;correlation coefficient;digital imaging and communications in medicine;female;gated recurrent unit ne…	1	0	9	6	1	1	1 - 2 - 3 - 5 - 6	PPV, NPV, Grad-CAM visualization	N	Y	M
https://www.scopus.com/inward/record.uri?eid=2-s2.0-85141746153&doi=10.3390%2Fhealthcare10112132&partnerID=40&md5=fa8894dada1f9d800e7ebc203d52657f	Application of a Deep Learning Approach to Analyze Large-Scale MRI Data of the Spine	10.3390/healthcare10112132	2022	Streckenbach, F. and Leifert, G. and Beyer, T. and Mesanovic, A. and W√§scher, H. and Cantr√©, D. and Langner, S. and Weber, M.-A. and Lindner, T.	Germany	Rostock University Medical Center, Department of Diagnostic and Interventional Radiology, Pediatric Radiology and Neuroradiology	9	2	Prospective Cohort Study	Healthcare (Switzerland)	3D-UNet;chronic low back pain;lumbar spinal stenosis;semantic segmentation;Computer aided diagnosis;Computer aided instruction;Deep learning;Hydraulic structures;Learning systems;Magnetic resonance imaging;Semantic Segmentation;Semantics;Surgery;3-dimensional;3d-unet;Automatic segmentations;Chronic low back pain;Lumbar spinal stenose;Machine-learning;Posterior elements;Quality of life;Semantic se…	1	1	1	5	2	1	2 - 6	N/A	N	N	R
https://www.scopus.com/inward/record.uri?eid=2-s2.0-85141729602&partnerID=40&md5=2ba5c64954072f613e95f84c7adbfaac	Deep Learning Algorithm Trained on Lumbar Magnetic Resonance Imaging to Predict Outcomes of Transforaminal Epidural Steroid Injection for Chronic Lumbosacral Radicular Pain	http://www.painphysicianjournal.com/linkout?issn=&vol=25&page=587	2022	Kim, J.K. and Wang, M.X. and Chang, M.C.	Republic of Korea	Yeungnam University (Gyeongsan-si, Republic of Korea)	3	2	Retrospective study	Pain Physician	cervical spine;channel attention;data augmentation;MRI image segmentation;U-Net;Article;cervical spine;cervical spondylosis;controlled study;deep learning;human;image analysis;image processing;image segmentation;intervertebral disk;major clinical study;nuclear magnetic resonance imaging;spinal cord;vertebral canal	1	2	1	3	2	0	1 - 3	Class Distribution	N	N	C
https://www.scopus.com/inward/record.uri?eid=2-s2.0-85138822550&doi=10.1016%2Fj.ejrad.2022.110531&partnerID=40&md5=a398d006d761577a4dc16160872c557d	Ultrafast cervcial spine MRI protocol using deep learning-based reconstruction: Diagnostic equivalence to a conventional protocol	10.1016/j.ejrad.2022.110531	2022	Kashiwagi, N. and Sakai, M. and Tsukabe, A. and Yamashita, Y. and Fujiwara, M. and Yamagata, K. and Nakamoto, A. and Nakanishi, K. and Tomiyama, N.	Japan	Osaka International Cancer Institute (Department of Diagnostic and Interventional Radiology)	9	6	Prospective study	European Journal of Radiology	Ultrafast MRI; Fast imaging; Deep-learning; Cervical spine; Diagnostic performance	0	5	1	1	1	1	N/A	Kappa statistics (weighted and unweighted), Individual equivalence index (95% CI), Inter-reader/intra-reader agreement rates (%)	N	N	R
https://www.scopus.com/inward/record.uri?eid=2-s2.0-85141676135&doi=10.3389%2Ffonc.2022.971871&partnerID=40&md5=3e876c9292f95c8fd2d273a55aa27d5d	BgNet: Classification of benign and malignant tumors with MRI multi-plane attention learning	10.3389/fonc.2022.971871	2022	Liu, H. and Jiao, M. and Xing, X. and Ou-Yang, H.-Q. and Yuan, Y. and Liu, J. and Li, Y. and Wang, C. and Lang, N. and Qian, Y. and Jiang, L. and Yuan, H. and Wang, X.	China	Beijing Key Laboratory of Mobile Computing and Pervasive Device, Institute of Computing Technology, Chinese Academy of Sciences (Beijing, China)	13	6	Retrospective development and validation study	Frontiers in Oncology	tumor classification; deep learning; multi-plane fusion; benign; malignant	1	2	2	5	6	1	1 - 3 - 5	average diagnostic time per case (seconds)	N	Y	M
https://www.scopus.com/inward/record.uri?eid=2-s2.0-85138473333&doi=10.1148%2Fradiol.220076&partnerID=40&md5=47f1204437e2fffb69101bb9cc875b7c	Improved Productivity Using Deep Learning‚Äìassisted Reporting for Lumbar Spine MRI	10.1148/radiol.220076	2022	Lim, D.S.W. and Makmur, A. and Zhu, L. and Zhang, W. and Cheng, A.J.L. and Sia, D.S.Y. and Eide, S.E. and Ong, H.Y. and Jagmohan, P. and Tan, W.C. and Khoo, V.M.H. and Wong, Y.M. and Thian, Y.L. and Baskar, S. and Teo, E.C. and Algazwi, D.A.R. and Yap, Q.V. and Chan, Y.H. and Tan, J.H. and Kumar, N. and Ooi, B.C. and Yoshioka, H. and Quek, S.T. and Hallinan, J.T.P.D.	Singapore	National University Hospital (Department of Diagnostic Imaging)	24	8	Retrospective single-center multireader comparative study	Radiology	Deep learning; lumbar spine MRI; spinal stenosis; diagnostic performance; interobserver agreement; reporting time	1	2	1	3	9	1	1 - 5	Gwet κ (interobserver agreement), interpretation time (seconds)	N	Y	R
https://www.scopus.com/inward/record.uri?eid=2-s2.0-85135943640&doi=10.1016%2Fj.compmedimag.2022.102109&partnerID=40&md5=5f7cbe04709c676788be29f221513f25	Residual-atrous attention network for lumbosacral plexus segmentation with MR image	10.1016/j.compmedimag.2022.102109	2022	Zhao, J. and Sun, L. and Zhou, X. and Huang, S. and Si, H. and Zhang, D.	China	Nanjing University of Aeronautics and Astronautics (College of Computer Science and Technology)	6	2	Retrospective development and validation segmentation study	Computerized Medical Imaging and Graphics	Lumbosacral plexus; Segmentation; Residual skip connection; Atrous convolution; Multi-scale attention	1	1	9	4	1	2	2 - 5 - 9	N/A	N	N	R
https://www.scopus.com/inward/record.uri?eid=2-s2.0-85135914168&doi=10.1111%2Fos.13431&partnerID=40&md5=2356765d703325a1be822256682e6aec	Automated Magnetic Resonance Image Segmentation of Spinal Structures at the L4-5 Level with Deep Learning: 3D Reconstruction of Lumbar Intervertebral Foramen	10.1111/os.13431	2022	Chen, T. and Su, Z. and Liu, Z. and Wang, M. and Cui, Z.-F. and Zhao, L. and Yang, L. and Zhang, W.-C. and Liu, X. and Liu, J. and Tan, S.-Y. and Li, S.-L. and Feng, Q.-J. and Pang, S. and Lu, H.	China	Fifth Affiliated Hospital of Sun Yat-sen University (Department of Spinal Surgery)	15	5	Prospective single-center study	Orthopaedic Surgery	3D reconstruction; Automated magnetic resonance image segmentation; Deep learning; Lumbar intervertebral foramen	1	1	1	3	2	1	2 - 6	ICC, Pearson r, segmentation time	N	N	M
https://www.scopus.com/inward/record.uri?eid=2-s2.0-85127107012&doi=10.1007%2Fs00330-022-08729-z&partnerID=40&md5=972167048e727555d0add6353e58e56c	Deep learning reconstruction for 1.5 T cervical spine MRI: effect on interobserver agreement in the evaluation of degenerative changes	10.1007/s00330-022-08729-z	2022	Yasaka, K. and Tanishima, T. and Ohtake, Y. and Tajima, T. and Akai, H. and Ohtomo, K. and Abe, O. and Kiryu, S.	Japan	The University of Tokyo Hospital (Department of Radiology)	8	5	Prospective single-center comparative study	European Radiology	Artificial intelligence; Deep learning; Magnetic resonance imaging; Cervical vertebrae; Neurodegenerative diseases	2	5	1	1	1	1	N/A	Cohen's weighted kappa (interobserver agreement), Wilcoxon signed-rank p-values, ordinal scale scores for image quality	N	N	R
https://www.scopus.com/inward/record.uri?eid=2-s2.0-85126858868&doi=10.1007%2Fs00330-022-08708-4&partnerID=40&md5=4939ab2f39e99534ce66e77d27f26641	Evaluation of deep learning reconstructed high-resolution 3D lumbar spine MRI	10.1007/s00330-022-08708-4	2022	Sun, S. and Tan, E.T. and Mintz, D.N. and Sahr, M. and Endo, Y. and Nguyen, J.T. and Lebel, R.M. and Carrino, J.A. and Sneag, D.B.	USA	Hospital for Special Surgery (Department of Radiology and Imaging)	9	2	Retrospective diagnostic study (one institution)	European Radiology	Deep learning; Imaging; Three-dimensional; Spine; Magnetic resonance imaging	2	5	9	3	0	2	N/A	Conger's kappa (κ), ICC (central stenosis only), Mann-Whitney U p-values, ordinal image quality/motion artifact scores	N	N	R
https://www.scopus.com/inward/record.uri?eid=2-s2.0-85135598813&doi=10.1097%2FBRS.0000000000004308&partnerID=40&md5=98753eb4d97592ab0fce49922bf7e31f	Automated Segmentation of Spinal Muscles From Upright Open MRI Using a Multiscale Pyramid 2D Convolutional Neural Network	10.1097/BRS.0000000000004308	2022	Dourthe, B. and Shaikh, N. and Pai S, A. and Fels, S. and Brown, S.H.M. and Wilson, D.R. and Street, J. and Oxland, T.R.	Canada	University of British Columbia (ICORD, Blusson Spinal Cord Centre)	8	7	Randomized trial	Spine	automated segmentation; computer-assisted diagnosis; deep learning; image processing; image segmentation; magnetic resonance imaging; medical imaging; orthopedic; spinal deformity	2	1	4	5	1	0	2	Dice loss, SD of Dice coefficients, Dice coefficient range / mean Dice score.	N	N	M
https://www.scopus.com/inward/record.uri?eid=2-s2.0-85134475570&doi=10.1007%2Fs00586-022-07320-w&partnerID=40&md5=dad601813ebb605ffc387a2410fc2c82	An externally validated deep learning model for the accurate segmentation of the lumbar paravertebral muscles	10.1007/s00586-022-07320-w	2022	Niemeyer, F. and Zanker, A. and Jonas, R. and Tao, Y. and Galbusera, F. and Wilke, H.-J.	Germany	Center for Trauma Research Ulm, Institute of Orthopaedic Research and Biomechanics, Ulm University	6	2	Retrospective development with prospective external validation	European Spine Journal	Deep learning; Segmentation; Sarcopenia; Paravertebral muscles; Fat fraction; Lumbar spine	0	1	9	3	1	0	9	Cross-sectional area (mm²), fat fraction (%), IoU-based loss	N	N	R
https://www.scopus.com/inward/record.uri?eid=2-s2.0-85134359557&doi=10.1007%2Fs00586-022-07311-x&partnerID=40&md5=6e524be76ef47ea7181197893985398e	External validation of the deep learning system ‚ÄúSpineNet‚Äù for grading radiological features of degeneration on MRIs of the lumbar spine	10.1007/s00586-022-07311-x	2022	Grob, A. and Loibl, M. and Jamaludin, A. and Winklhofer, S. and Fairbank, J.C.T. and Fekete, T.F. and Porchet, F. and Mannion, A.F.	Switzerland	Schulthess Klinik, Zurich (Department of Spine Surgery and Neurosurgery)	8	6	Retrospective external validation study	European Spine Journal	Degenerative spinal disorders; Diagnostic imaging; Inter-rater agreement; Automated software; Machine learning; Disc degeneration	2	2	1	3	1	1	3 - 5 - 6	Weighted Kappa (κ), Spearman's ρ, Lin's concordance correlation (ρc), Wilcoxon signed-rank p-values, Class Average Accuracy (CAA)	N	N	R
https://www.scopus.com/inward/record.uri?eid=2-s2.0-85123837746&doi=10.1007%2Fs00586-022-07121-1&partnerID=40&md5=d8ce9cb7ff2567333422264d78a4ce5d	A deep learning-based method for the diagnosis of vertebral fractures on spine MRI: retrospective training and validation of ResNet	10.1007/s00586-022-07121-1	2022	Yeh, L.-R. and Zhang, Y. and Chen, J.-H. and Liu, Y.-L. and Wang, A.-C. and Yang, J.-Y. and Yeh, W.-C. and Cheng, C.-S. and Chen, L.-K. and Su, M.-Y.	Taiwan	Department of Radiology, E-Da Hospital and I-Shou University (Kaohsiung, Taiwan)	10	5	Retrospective studywith tenfold cross-validation	European Spine Journal	Automated differential diagnosis; Benign spinal fractures; Less experienced radiologists; Malignant spinal fractures	1	2	3	5	1	3	3 - 5	McNemar p-values, Fisher’s exact test p-values, TP/TN/FN/FP counts, logistic regression accuracy on 15 features	N	N	M
https://www.scopus.com/inward/record.uri?eid=2-s2.0-85117694202&doi=10.1007%2Fs00586-021-07020-x&partnerID=40&md5=c255d75ff1593f984dfe388620d72537	Learning-based fully automated prediction of lumbar disc degeneration progression with specified clinical parameters and preliminary validation	10.1007/s00586-021-07020-x	2022	Cheung, J.P.Y. and Kuang, X. and Lai, M.K.L. and Cheung, K.M.-C. and Karppinen, J. and Samartzis, D. and Wu, H. and Zhao, F. and Zheng, Z. and Zhang, T.	Hong Kong	Department of Orthopaedics and Traumatology, Queen Mary Hospital, The University of Hong Kong	10	8	retrospective longitudinal cohort study (5-year follow-up), multi-institution	European Spine Journal	Lumbar disc degeneration; Convolutional neural network; Magnetic resonance imaging; Disease progression prediction	1	4	1	3	9	0	3 - 4 - 6	TP/TN/FP/FN percentages per fold, mean ± SD	N	N	R
https://www.scopus.com/inward/record.uri?eid=2-s2.0-85129484598&doi=10.1016%2Fj.media.2022.102456&partnerID=40&md5=5a24c99bb3b1f184d5516eedd9bcb43c	Reasoning discriminative dictionary-embedded network for fully automatic vertebrae tumor diagnosis	10.1016/j.media.2022.102456	2022	Zhao, S. and Chen, B. and Chang, H. and Chen, B. and Li, S.	China	Department of Artificial Intelligence, Sun Yat-sen University (Guangzhou, China)	5	4	Retrospective development and validation study	Medical Image Analysis	Vertebrae tumor diagnosis system; Vertebrae recognition; Dictionary embedded deep learning; Graph reasoning	0	0	2	5	8	2	1 - 3 - 6	IRA (image recognition accuracy), IDR (identification rate), mAP₇₅, intra-observer variability, ROC curve	N	N	R
https://www.scopus.com/inward/record.uri?eid=2-s2.0-85133299806&doi=10.3389%2Ffimmu.2022.897959&partnerID=40&md5=84834eb2dd271e388c3f6217621a454a	Transformer-Based Deep-Learning Algorithm for Discriminating Demyelinating Diseases of the Central Nervous System With Neuroimaging	10.3389/fimmu.2022.897959	2022	Huang, C. and Chen, W. and Liu, B. and Yu, R. and Chen, X. and Tang, F. and Liu, J. and Lu, W.	China	Department of Radiology, The Second Xiangya Hospital of Central South University (Changsha, China)	8	4	Retrospective study	Frontiers in Immunology	deep learning; demyelinating disease; differential diagnosis; MRI; multiple sclerosis; myelin oligodendrocyte glycoprotein antibody-associated disease; neuromyelitis optica spectrum disorder; transformer	1	2	5	5	5	3	1 - 3 - 4 - 5 - 6	PPV, NPV, Kappa coefficient, MCC, confusion matrices, ROC curve, McNemar test p-values,	N	Y	M
https://www.scopus.com/inward/record.uri?eid=2-s2.0-85133378908&doi=10.3389%2Ffendo.2022.890371&partnerID=40&md5=03a9a50f20e4fe4dfb701541210fc3b5	Automatic Grading of Disc Herniation, Central Canal Stenosis and Nerve Roots Compression in Lumbar Magnetic Resonance Image Diagnosis	10.3389/fendo.2022.890371	2022	Su, Z. and Liu, J. and Yang, M.-S. and Chen, Z.-Y. and You, K. and Shen, J. and Huang, C.-J. and Zhao, Q.-H. and Liu, E.-Q. and Zhao, L. and Feng, Q.-J. and Pang, S. and Li, S.-L. and Lu, H.	China	Department of Spinal Surgery, The Fifth Affiliated Hospital of Sun Yat-Sen University (Zhuhai, China)	14	4	Retrospective development and external validation study	Frontiers in Endocrinology	magnetic resonance imaging; diagnosis; deep learning; artificial intelligence; low back pain	1	0	1	3	1	0	1 - 3 - 4 - 5- 6	confusion matrices, ROC curves, Gwet κ,	N	N	R
https://www.scopus.com/inward/record.uri?eid=2-s2.0-85130575607&doi=10.3389%2Ffonc.2022.849447&partnerID=40&md5=6fdcb7d640c3c21089f1b8e6b4e86888	Deep Learning Model for Classifying Metastatic Epidural Spinal Cord Compression on MRI	10.3389/fonc.2022.849447	2022	Hallinan, J.T.P.D. and Zhu, L. and Zhang, W. and Lim, D.S.W. and Baskar, S. and Low, X.Z. and Yeong, K.Y. and Teo, E.C. and Kumarakulasinghe, N.B. and Yap, Q.V. and Chan, Y.H. and Lin, S. and Tan, J.H. and Kumar, N. and Vellayappan, B.A. and Ooi, B.C. and Quek, S.T. and Makmur, A.	Singapore	Department of Diagnostic Imaging, National University Hospital (NUH), Singapore	18	10	Retrospective study	Frontiers in Oncology	deep learning model; metastatic epidural spinal cord compression; MRI; Bilsky classification; spinal metastasis classification; spinal metastatic disease; epidural spinal cord compression	1	2	2	2	1	1	5	Gwet’s kappa, confusion matrices	N	Y	R
https://www.scopus.com/inward/record.uri?eid=2-s2.0-85127693595&doi=10.3389%2Ffonc.2022.814667&partnerID=40&md5=7e6aa22253b88464cdc0a02b97b096d0	Evaluation of Deep Learning-Based Automated Detection of Primary Spine Tumors on MRI Using the Turing Test	10.3389/fonc.2022.814667	2022	Ouyang, H. and Meng, F. and Liu, J. and Song, X. and Li, Y. and Yuan, Y. and Wang, C. and Lang, N. and Tian, S. and Yao, M. and Liu, X. and Yuan, H. and Jiang, S. and Jiang, L.	China	Department of Orthopaedics, Peking University Third Hospital (Beijing, China)	14	6	Retrospective study	Frontiers in Oncology	spine tumor; Turing test; deep learning; MRI; primary tumor	1	3	2	5	1	3	N/A	average precision / mAP, IoU threshold / IoU, misclassification rate, time per question	N	N	R
https://www.scopus.com/inward/record.uri?eid=2-s2.0-85123266233&doi=10.1016%2Fj.jocn.2021.11.037&partnerID=40&md5=bd92ecbef0639f8958451f5d8c379535	Determining the short-term neurological prognosis for acute cervical spinal cord injury using machine learning	10.1016/j.jocn.2021.11.037	2022	Okimatsu, S. and Maki, S. and Furuya, T. and Fujiyoshi, T. and Kitamura, M. and Inada, T. and Aramomi, M. and Yamauchi, T. and Miyamoto, T. and Inoue, T. and Yunde, A. and Miura, M. and Shiga, Y. and Inage, K. and Orita, S. and Eguchi, Y. and Ohtori, S.	Japan	Chiba University Graduate School of Medicine (Department of Orthopaedic Surgery)	17	5	Retrospective multicenter study	Journal of Clinical Neuroscience	Spinal cord injury; Prognosis; ASIA impairment scale; Trauma; Cervical	1 - 2	4	3	6	9	2	3 - 4 - 6	confusion matrix, concordance rate, feature importance	N	N	C
https://www.scopus.com/inward/record.uri?eid=2-s2.0-85168737116&doi=10.1016%2Fj.cmpbup.2022.100081&partnerID=40&md5=86bb4f0cd6902f03d9d9969bb4b41232	A deep learning pipeline for automatized assessment of spinal MRI	10.1016/j.cmpbup.2022.100081	2022	Balzer, I. and M√ºhlemann, M. and Jokeit, M. and Rawal, I.S. and Snedeker, J.G. and Farshad, M. and Widmer, J.	Switzerland	ETH Zurich (Institute of Biomechanics)	7	3	Retrospective development and validation study	Computer Methods and Programs in Biomedicine Update	Quantitative MRI grading; Lumbar spine anatomy; Intervertebral disc; Degenerative changes; Medical decision support system; Deep learning	1	0	1	3	9	0	2	AUC-PR, Top-2 categorical accuracy, processing success rate	N	N	R
https://www.scopus.com/inward/record.uri?eid=2-s2.0-85122897276&doi=10.1371%2Fjournal.pone.0261659&partnerID=40&md5=67042e7088e24e6172c4b8bb78ed441e	Automated selection of mid-height intervertebral disc slice in traverse lumbar spine MRI using a combination of deep learning feature and machine learning classifier	10.1371/journal.pone.0261659	2022	Natalia, F. and Young, J.C. and Afriliana, N. and Meidia, H. and Yunus, R.E. and Sudirman, S.	Indonesia	Universitas Multimedia Nusantara (Faculty of Engineering and Informatics)	6	3	Retrospective study	PLOS ONE	intervertebral disc; lumbar spine MRI; traverse slice selection; deep learning features; machine learning classifier; Support Vector Machine	1	2	1	3	9	2	3 - 4 - 6	confusion matrices, per-class summaries, min/median/max performance summaries	Y	Y	R
https://www.scopus.com/inward/record.uri?eid=2-s2.0-85121012221&doi=10.1016%2Fj.bspc.2021.103230&partnerID=40&md5=f825b2989719fa90e09a2b1812996129	Deep Learning based Vertebral Body Segmentation with Extraction of Spinal Measurements and Disorder Disease Classification	10.1016/j.bspc.2021.103230	2022	Masood, R.F. and Taj, I.A. and Khan, M.B. and Qureshi, M.A. and Hassan, T.	Pakistan	Capital University of Science and Technology (CUST), Department of Electrical Engineering (Islamabad)	5	4	Retrospective development and validation study	Biomedical Signal Processing and Control	Lumbar spine dataset; Spinal measurements; Automated disease classification	0	0	4	3	1	3	2 - 3 - 7 - 9	mean pixel precision (MPP), Pearson R, p < 0.05	Y	N	R
https://www.scopus.com/inward/record.uri?eid=2-s2.0-85120403967&doi=10.1016%2Fj.compbiomed.2021.105105&partnerID=40&md5=59425626a40d59a51ca1906d259ab02c	Fully automated segmentation of lumbar bone marrow in sagittal, high-resolution T1-weighted magnetic resonance images using 2D U-NET	10.1016/j.compbiomed.2021.105105	2022	Hwang, E.-J. and Kim, S. and Jung, J.-Y.	Republic of Korea	Seoul St. Mary’s Hospital, College of Medicine, The Catholic University of Korea	3	2	Retrospective observational single-center study	Computers in Biology and Medicine	Magnetic resonance imaging; Lumbar bone marrow; Hematologic diseases; Deep learning segmentation and image segmentation model	1	1	2	3	1	2	2 - 9	Jaccard Index (JI), Hausdorff surface distance (HSD)	N	Y	R
https://www.scopus.com/inward/record.uri?eid=2-s2.0-85119046714&doi=10.1016%2Fj.media.2021.102261&partnerID=40&md5=6ce254594d4eb488d0d86536f5df6a34	DGMSNet: Spine segmentation for MR image by a detection-guided mixed-supervised segmentation network	10.1016/j.media.2021.102261	2022	Pang, S. and Pang, C. and Su, Z. and Lin, L. and Zhao, L. and Chen, Y. and Zhou, Y. and Lu, H. and Feng, Q.-J.	China	School of Biomedical Engineering, Southern Medical University (Guangzhou)	9	5	Retrospective development and validation segmentation study	Medical Image Analysis	Deep learning; Spine; Mixed-supervised segmentation; Ensemble learning	1	1	9	3	9	2	2 - 6	localization error (mm), identification rate (%)	Y	Y	R
https://www.scopus.com/inward/record.uri?eid=2-s2.0-85088499784&doi=10.1080%2F03772063.2020.1792358&partnerID=40&md5=12fdcc7be1150ad997deab5392b0389b	Multidomain Feature Level Fusion for Classification of Lumbar Intervertebral Disc Using Spine MR Images	10.1080/03772063.2020.1792358	2022	Shinde, J.V. and Joshi, Y.V. and Manthalkar, R.R.	India	Department of Computer Engineering, L.G.N.S. College of Engineering, Nasik, India	3	2	retrospective methodological classification study using a private lumbar MRI dataset	IETE Journal of Research	Automated disease classification;Lumbar spine dataset;Spinal measurements;Classification (of information);Decision making;Deep learning;Diagnosis;Extraction;Grading;Medical imaging;Semantics;Automated disease classification;Body segmentations;Diagnostic decision makings;Disease classification;Lumbar lordosis;Lumbar spine dataset;Lumbar spines;Spinal measurement;Spine datasets;Vertebral body;Autom…	0	2	1	3	9	2	1 - 3 - 4 - 5	Precision, TPR, FPR, Kappa coefficient	N	N	R
https://www.scopus.com/inward/record.uri?eid=2-s2.0-85120086569&doi=10.1148%2Fradiol.2021204731&partnerID=40&md5=f9245902fbabc3dac947874869a776a0	Deep learning for adjacent segment disease at preoperative mri for cervical radiculopathy	10.1148/radiol.2021204731	2021		USA	Computational Neuroscience Outcomes Center, Department of Neurosurgery, Brigham and Women's Hospital, Harvard Medical School, Boston, MA, USA (also affiliated with Leiden University Medical Center, Netherlands)	11	2	retrospective chart review	Radiology		0	4	8	1	1	3	1 - 3 - 4 - 5	Matthews correlation coefficient (MCC), informedness, markedness, positive predictive value (PPV), negative predictive value (NPV), McNemar test statistic, Cohen's κ for interobserver agreement; GradCAM saliency maps for interpretability	N	Y	C
https://www.scopus.com/inward/record.uri?eid=2-s2.0-85117130596&doi=10.3390%2Fjcm10204760&partnerID=40&md5=31b611b28dd0dbb2fc82e8914d62d3f8	Automatic segmentation of specific intervertebral discs through a two-stage multiresunet model	10.3390/jcm10204760	2021	Cheng, Y.-K. and Lin, C.-L. and Huang, Y.-C. and Chen, J.-C. and Lan, T.-P. and Lian, Z.-Y. and Chuang, C.-H.	Taiwan	China Medical University Hospital (Department of Neurosurgery), Taichung	7	5	Retrospective single-center study	Journal of Clinical Medicine	deep learning; U-Net; spine image; degenerative disc; intervertebral disc segmentation	1	1	9	3	1	2	3 - 9	discrimination criterion (70% overlap threshold), training time	N	N	R
https://www.scopus.com/inward/record.uri?eid=2-s2.0-85103704533&doi=10.1016%2Fj.spinee.2021.03.006&partnerID=40&md5=7801e2d2f35f9b2130e7197f379075e8	Using artificial intelligence to diagnose fresh osteoporotic vertebral fractures on magnetic resonance images	10.1016/j.spinee.2021.03.006	2021	Yabu, A. and Hoshino, M. and Tabuchi, H. and Takahashi, S. and Masumoto, H. and Akada, M. and Morita, S. and Maeno, T. and Iwamae, M. and Inose, H. and Kato, T. and Yoshii, T. and Tsujio, T. and Terai, H. and Toyoda, H. and Suzuki, A. and Tamai, K. and Ohyama, S. and Hori, Y. and Okawa, A. and Nakamura, H.	Japan	Department of Orthopaedic Surgery, Osaka City University Graduate School of Medicine	21	8	retrospective analysis of MR images	The Spine Journal	Artificial intelligence; Convolutional neural network; Deep learning; Ensemble method; Fresh fracture; Magnetic resonance image; Old fracture; Osteoporosis; Osteoporotic vertebral fracture; Vertebra detection	1	2	3	5	9	3	1 - 3 - 5	PPV, NPV, ROC curve,	N	N	C
https://www.scopus.com/inward/record.uri?eid=2-s2.0-85111574255&doi=10.1016%2Fj.ejmp.2021.07.030&partnerID=40&md5=ac2233ff63c53510243cc9e6267710f8	A pipeline to quantify spinal cord atrophy with deep learning: Application to differentiation of MS and NMOSD patients	10.1016/j.ejmp.2021.07.030	2021	Toufani, H. and Vard, A. and Adibi, I.	Iran	Isfahan University of Medical Sciences (School of Advanced Technologies in Medicine; Dept of Bioelectrics and Biomedical Engineering)	3	5	Retrospective development and validation study	Physica Medica	Spinal cord atrophy; Deep learning; Multiple sclerosis; Neuromyelitis optica spectrum disorder	1	1	5	6	1	2	2 - 3 - 5 - 9	Precision, HSD, MSD	N	N	R
https://www.scopus.com/inward/record.uri?eid=2-s2.0-85114311258&doi=10.3389%2Ffbioe.2021.708137&partnerID=40&md5=f0f205d759b1059770cad813e987618e	Lumbar Disc Herniation Automatic Detection in Magnetic Resonance Imaging Based on Deep Learning	10.3389/fbioe.2021.708137	2021	Tsai, J.-Y. and Hung, I.Y.-J. and Guo, Y.L. and Jan, Y.-K. and Lin, C.-Y. and Shih, T.T.-F. and Chen, B.-B. and Lung, C.-W.	Taiwan	Asia University (Department of Digital Media Design), Taichung	8	9	Retrospective study	Frontiers in Bioengineering and Biotechnology	object detection; medical image; YOLO; low back pain; data augmentation	1	3	1	3	1	0	2 - 3 - 4 - 6 - 9	jaccard, mAP, AP, confidence score	N	N	R
https://www.scopus.com/inward/record.uri?eid=2-s2.0-85105830520&doi=10.1016%2Fj.bone.2021.115972&partnerID=40&md5=9d3ebfbf833bd374c4eb005a6448edb8	A deep learning system for automated, multi-modality 2D segmentation of vertebral bodies and intervertebral discs	10.1016/j.bone.2021.115972	2021	Suri, A. and Jones, B.C. and Ng, G. and Anabaraonye, N. and Beyrer, P. and Domi, A. and Choi, G. and Tang, S. and Terry, A. and Leichner, T. and Fathali, I. and Bastin, N. and Chesnais, H. and Rajapakse, C.S.	USA	Perelman School of Medicine, University of Pennsylvania	14	1	Retrospective development and validation segmentation study	Bone	Artificial intelligence; Radiomics; Vertebral bodies and intervertebral discs; Bone disease; Image analysis	1	1	9	5	1	0	2 - 3	Pearson r, average/relative error, evaluation time	N	N	R
https://www.scopus.com/inward/record.uri?eid=2-s2.0-85109115544&doi=10.1148%2Fradiol.2021204289&partnerID=40&md5=01efee510002349c638fdb5cacbc4934	Deep Learning Model for Automated Detection and Classification of Central Canal, Lateral Recess, and Neural Foraminal Stenosis at Lumbar Spine MRI	10.1148/radiol.2021204289	2021	W Goedmakers, C.M.W. and Lak, A.M. and Duey, A.H. and Senko, A.W. and Arnaout, O. and Groff, M.W. and Smith, T.R. and Vleggeert-Lankamp, C.L.A. and Zaidi, H.A. and Rana, A. and Boaro, A.	Singapore	Department of Diagnostic Imaging, National University Hospital, Singapore	16	8	retrospective diagnostic model development and validation study with external testing	Radiology	Deep learning segmentation and image segmentation model;Hematologic diseases;Lumbar bone marrow;Magnetic resonance imaging;Automation;Deep learning;Image segmentation;Magnetism;Resonance;2 - Dimensional;3-dimensional;Bone marrow;Deep learning segmentation and image segmentation model;Grow cuts;Healthy subjects;Hematologic disease;High resolution;Image segmentation model;Lumbar bone marrow;Magneti…	1	2	1	3	9	1	5	detection recall (%), Gwet κ, 95% CI	N	Y	R
https://www.scopus.com/inward/record.uri?eid=2-s2.0-85104786088&doi=10.1016%2Fj.cmpb.2021.106074&partnerID=40&md5=2804680a77e10af991bfa3b1d3d39595	Deep neural network for automated simultaneous intervertebral disc (IVDs) identification and segmentation of multi-modal MR images	10.1016/j.cmpb.2021.106074	2021	Das, P. and Pal, C. and Acharyya, A. and Chakrabarti, A. and Basu, S.	India	University of Calcutta, A.K. Choudhury School of Information Technology	5	3	Retrospective development and validation segmentation study	Computer Methods and Programs in Biomedicine	Deep learning; Convolutional neural networks; Intervertebral disc; Segmentation; Identification; Region-to-image matching (RIM)	1	0	1	5	9	2	2 - 3 - 4 - 9	MDOC, SDDOC, ASD, HD, inference time	Y	N	R
https://www.scopus.com/inward/record.uri?eid=2-s2.0-85106960031&doi=10.3390%2Fdiagnostics11050902&partnerID=40&md5=6db0166610bb097c946174ad15bf5b4d	Detection of degenerative changes on mr images of the lumbar spine with a convolutional neural network: A feasibility study	10.3390/diagnostics11050902	2021	Lehnen, N.C. and Haase, R. and Faber, J. and R√ºber, T. and Vatter, H. and Radbruch, A. and Schmeel, F.C.	Germany	Department of Neuroradiology, University Hospital Bonn (Rheinische Friedrich-Wilhelms-Universität Bonn)	7	5	Retrospective diagnostic study	Diagnostics	deep learning; lumbar spine; MRI; automated reading; diagnostic performance; disc protrusion; disc bulging; spinal canal stenosis; nerve root compression; spondylolisthesis	0	0	1	3	1	1	3 - 5	PPV, NPV, confusion matrices, McNemar test p-values	N	N	R
https://www.scopus.com/inward/record.uri?eid=2-s2.0-85104380792&doi=10.3390%2Felectronics10080982&partnerID=40&md5=7d5e4cc06808518176956b901323b666	Herniated lumbar disc generation and classification using cycle generative adversarial networks on axial view mri	10.3390/electronics10080982	2021	Mbarki, W. and Bouchouicha, M. and Tshibasu, F.T. and Moreau, E. and Sayadi, M.	Tunisia	Laboratoire Signal, Image et Maitrise de l’Energie (SIME), ENSIT, Université de Tunis	5	4	Retrospective development and validation study	Electronics	GANs; CycleGAN; herniations; lumbar intervertebral discs; generation; classification	0	0	1	3	3	2	3 - 6 - 9	Average Precision (AP), generator/discriminator accuracies, generator/discriminator losses	N	N	R
https://www.scopus.com/inward/record.uri?eid=2-s2.0-85093501343&doi=10.1002%2Fjmri.27400&partnerID=40&md5=e2632d396b38be25bff55bfda9609d12	Automated Grading of Lumbar Disc Degeneration Using a Push-Pull Regularization Network Based on MRI	10.1002/jmri.27400	2021	Gao, F. and Liu, S. and Zhang, X. and Wang, X. and Zhang, J.	China	College of Engineering, Peking University (Beijing, China)	5	3	Retrospective single-center study	Journal of Magnetic Resonance Imaging	intervertebral disc degeneration; Pfirrmann grading; MRI; deep learning; convolutional neural network; push-pull regularization	0	2	1	3	4	2	3	mean ± SD, confusion matrix	N	N	R
https://www.scopus.com/inward/record.uri?eid=2-s2.0-85099486716&doi=10.1097%2FRLI.0000000000000709&partnerID=40&md5=b15a88676fcc3d5ef36e90f9afeed9d5	A Deep Learning Model for the Accurate and Reliable Classification of Disc Degeneration Based on MRI Data	10.1097/RLI.0000000000000709	2021	Niemeyer, F. and Galbusera, F. and Tao, Y. and Kienle, A. and Beer, M. and Wilke, H.-J.	Germany	Institute for Orthopaedic Research and Biomechanics, University Hospital Ulm, Ulm, Germany	6	4	Retrospective multicenter development and validation study	Investigative Radiology	spine; intervertebral disc degeneration; radiological classification; deep learning; machine learning; image analysis	1	2	1	3	1	3	3 - 4 - 5 - 6 - 7 - 9	Cohen’s κ, MCC, Lin’s concordance correlation coefficient, Pearson’s r, within-one-grade agreement	N	N	R
https://www.scopus.com/inward/record.uri?eid=2-s2.0-85122179766&doi=10.1155%2F2021%2F9623991&partnerID=40&md5=35a32aee56e6d3089c27070a0b735be6	Deep Learning-Based Correlation Analysis between Spine Surgery Lumbar Facet Joint and Lumbar Disc Herniation Using Magnetic Resonance Images	10.1155/2021/9623991	2021	Wang, C. and Yuan, J. and Huang, Z. and Shi, Z.	China	Changhai Hospital affiliated to Naval Medical University (Department of Orthopedics, Shanghai)	4	1	Prospective observational study	Scientific Programming	convolutional neural network; lumbar disc herniation; lumbar facet joint; magnetic resonance imaging	0	4	1	3	1	2	3 - 5 - 6	N/A	N	N	C
https://www.scopus.com/inward/record.uri?eid=2-s2.0-85111577676&doi=10.1016%2Fj.nicl.2021.102766&partnerID=40&md5=d3a43f7929de470d81d5cae7e6a9137e	Automatic multiclass intramedullary spinal cord tumor segmentation on MRI with deep learning	10.1016/j.nicl.2021.102766	2021	Lemay, A. and Gros, C. and Zhuo, Z. and Zhang, J. and Duan, Y. and Cohen-Adad, J. and Liu, Y.	Canada	NeuroPoly Lab, Institute of Biomedical Engineering, Polytechnique Montreal	7	4	Retrospective development and validation segmentation study	NeuroImage: Clinical	Deep learning; Automatic segmentation; Spinal cord tumor; MRI; Multiclass; CNN	1	1	2	6	1	2	2 - 6	true positive detection rate, false positive detection rate, absolute volume difference, relative volume difference	N	Y	R
https://www.scopus.com/inward/record.uri?eid=2-s2.0-85099182514&doi=10.3171%2F2020.10.FOCUS20801&partnerID=40&md5=5a10efc3d435beb4c94a22287fe3809a	Magnetic resonance imaging-based synthetic computed tomography of the lumbar spine for surgical planning: a clinical proof-of-concept	10.3171/2020.10.FOCUS20801	2021	Staartjes, V.E. and Seevinck, P.R. and Vandertop, W.P. and van Stralen, M. and Schr√∂der, M.L.	The Netherlands	Department of Neurosurgery, Bergman Clinics (Amsterdam)	5	5	Prospective proof-of-concept study	Neurosurgical Focus	lumbar spine; image conversion; imaging; deep learning; machine learning; artificial intelligence	0	8	9	3	1	0	N/A	mean absolute difference, qualitative visual adequacy, CTDIvol potentially avoided	N	N	R
https://www.scopus.com/inward/record.uri?eid=2-s2.0-85092718296&doi=10.1016%2Fj.media.2020.101826&partnerID=40&md5=4e413cc99557b7b39689b58a23a78ed5	Automatic vertebrae recognition from arbitrary spine MRI images by a category-Consistent self-calibration detection framework	10.1016/j.media.2020.101826	2021	Zhao, S. and Wu, X. and Chen, B. and Li, S.	China	Sun Yat-Sen University (Guangzhou, China)	4	3	Retrospective development and validation study	Medical Image Analysis	Vertebrae recognition; Object detection; Message passing; Dictionary learning; Label consistency	0	3	9	5	0	2	3 - 9	Identification rate (IDR), mAP75	N	N	R
https://www.scopus.com/inward/record.uri?eid=2-s2.0-85097679721&doi=10.14444%2F7132&partnerID=40&md5=bef2b0c4d354c215de839d9e1181d65d	Reliability analysis of deep learning algorithms for reporting of routine lumbar MRI scans	10.14444/7132	2020	Lewandrowski, K.-U. and Muraleedharan, N. and Eddy, S.A. and Sobti, V. and Reece, B.D. and Ram√≠rez-Le√≥n, J.F.R. and Shah, S.	USA	Center for Advanced Spine Care of Southern Arizona and Surgical Institute of Tucson (Tucson, Arizona)	7	7	Retrospective reliability validation study	International Journal of Spine Surgery	artificial intelligence; deep neural network learning; magnetic resonance imaging; spinal pathologies; reliability analysis	0	2	1	3	0	1	1 - 5	PPV, NPV, Cronbach alpha, Cohen kappa	N	N	R
https://www.scopus.com/inward/record.uri?eid=2-s2.0-85097678666&doi=10.14444%2F7131&partnerID=40&md5=fabfd48d1c998382848b0e6590cd8146	Feasibility of deep learning algorithms for reporting in routine spine magnetic resonance imaging	10.14444/7131	2020	Lewandrowski, K.-U. and Muraleedharan, N. and Eddy, S.A. and Sobti, V. and Reece, B.D. and Ram√≠rez-Le√≥n, J.F.R. and Shah, S.	USA	Center for Advanced Spine Care of Southern Arizona and Surgical Institute of Tucson (Tucson, Arizona)	7	7	Retrospective multicenter development and validation study	International Journal of Spine Surgery	artificial intelligence; deep neural network learning; magnetic resonance imaging; spinal pathologies; feasibility analysis	0	0	1	3	9	1	3 - 5	Positive predictive value (PPV), Binary cross-entropy loss / log loss	N	N	M
https://www.scopus.com/inward/record.uri?eid=2-s2.0-85096871809&doi=10.1016%2Fj.jocn.2020.11.003&partnerID=40&md5=7f47e593df7e7f0cc66c5fc87c6c7a60	Injury volume extracted from MRI predicts neurologic outcome in acute spinal cord injury: A prospective TRACK-SCI pilot study	10.1016/j.jocn.2020.11.003	2020	Mummaneni, N. and Burke, J.F. and DiGiorgio, A.M. and Thomas, L.H. and Duong-Fernandez, X. and Harris, M. and Pascual, L.U. and Ferguson, A.R. and Russell Huie, J. and Pan, J.Z. and Hemmerle, D.D. and Singh, V. and Torres-Esp√≠n, A. and Omondi, C. and Kyritsis, N. and Weinstein, P.R. and Whetstone, W.D. and Manley, G.T. and Bresnahan, J.C. and Beattie, M.S. and Cohen-Adad, J. and Dhall, S.S. and …	USA	Brain and Spinal Injury Center, Zuckerberg San Francisco General Hospital (San Francisco, CA)	23	12	Prospective cohort study	Journal of Clinical Neuroscience	Spinal cord injury; Magnetic resonance imaging; Neurologic outcome; Motor scores	1	4	3	6	1	1	N/A	Pearson correlation coefficient, Beta coefficient from multiple linear regression	N	N	M
https://www.scopus.com/inward/record.uri?eid=2-s2.0-85088994037&doi=10.1016%2Fj.inat.2020.100837&partnerID=40&md5=e2f0336378642b714247ba80fc2df309	Lumbar spine discs classification based on deep convolutional neural networks using axial view MRI	10.1016/j.inat.2020.100837	2020	Mbarki, W. and Bouchouicha, M. and Frizzi, S. and Tshibasu, F.T. and Ben Farhat, L.B. and Sayadi, M.	Tunisia	Laboratoire Signal, Image et Maitrise de l'Energie (SIME), ENSIT, Université de Tunis	6	6	Retrospective single-center study	Interdisciplinary Neurosurgery	axial lumbar MRI; disc herniation; deep learning; CNN; VGG16; U-net; segmentation; classification	0	0	1	3	1	0	3 - 9	Loss / loss function, Per-class accuracy / class-specific performance for disc, apophyse, and background	N	N	R
https://www.scopus.com/inward/record.uri?eid=2-s2.0-85090997745&doi=10.3389%2Ffendo.2020.00612&partnerID=40&md5=4dbc777e1f3e44c03e030b01cd6d1b3a	Automatic Vertebral Body Segmentation Based on Deep Learning of Dixon Images for Bone Marrow Fat Fraction Quantification	10.3389/fendo.2020.00612	2020	Zhou, J. and Damasceno, P.F. and Chachad, R. and Cheung, J.R. and Ballatori, A. and Lotz, J.C. and Lazar, A.A. and Link, T.M. and Fields, A.J. and Krug, R.	USA	Department of Radiology and Biomedical Imaging, University of California San Francisco (UCSF)	10	6	Prospective observational study	Frontiers in Endocrinology	spine imaging; bone marrow fat; biomarkers; deep learning; segmentation; magnetic resonance imaging	1	1	9	3	1	1	1 - 2 - 4 - 5 - 6 - 9	Bland-Altman bias, Limits of agreement (LOA), Cohen’s kappa, Intraclass correlation coefficient (ICC), Precision error,Intraclass correlation coefficient (ICC), Pearson correlation coefficient	N	Y	R
https://www.scopus.com/inward/record.uri?eid=2-s2.0-85084961394&doi=10.1097%2FBRS.0000000000003353&partnerID=40&md5=f8892f8d7fd60bbadfe60e9aa2e2794c	A Deep Convolutional Neural Network With Performance Comparable to Radiologists for Differentiating Between Spinal Schwannoma and Meningioma	10.1097/BRS.0000000000003353	2020	Maki, S. and Furuya, T. and Horikoshi, T. and Yokota, H. and Mori, Y. and Ota, J. and Kawasaki, Y. and Miyamoto, T. and Norimoto, M. and Okimatsu, S. and Shiga, Y. and Inage, K. and Orita, S. and Takahashi, H. and Suyari, H. and Uno, T. and Ohtori, S.	Japan	Department of Orthopaedic Surgery, Graduate School of Medicine, Chiba University (Chiba, Japan)	17	6	Retrospective study	Spine (Phila Pa 1976)	spinal schwannoma; meningioma; MRI; convolutional neural network; deep learning; differential diagnosis	0	2	2	1 - 2 - 3	1	1	1 - 3 - 5	Youden index	N	N	P
https://www.scopus.com/inward/record.uri?eid=2-s2.0-85067291814&doi=10.1038%2Fs41598-019-44416-8&partnerID=40&md5=f89e82c5737e76622d7068dd48db8a1a	Deep Learning Convolutional Neural Networks for the Automatic¬†Quantification of¬†Muscle Fat Infiltration Following Whiplash Injury	10.1038/s41598-019-44416-8	2019	Weber II, K.A. and Smith, A.C. and Wasielewski, M. and Eghtesad, K. and Upadhyayula, P.A. and Wintermark, M. and Hastie, T.J. and Parrish, T.B. and Mackey, S. and Elliott, J.M.	USA	Stanford University (Department of Anesthesiology, Perioperative and Pain Medicine)	10	8	prospective study	Scientific Reports	Muscle fat infiltration; deep learning; convolutional neural network; segmentation; whiplash; cervical spine	1	1	3	1	1	1	2 - 5 - 6 - 9	Conformity coefficient, Volume ratio, Intraclass correlation coefficient (ICC), Pearson correlation / partial Pearson correlations, Bland-Altman bias and 95% limits of agreement, Linear regression coefficient (β), p-values	N	N	R
https://www.scopus.com/inward/record.uri?eid=2-s2.0-85064629816&doi=10.1016%2Fj.mri.2019.04.009&partnerID=40&md5=74b9f121e5a37da2c9cc1e49455148da	Open-source pipeline for multi-class segmentation of the spinal cord with deep learning	10.1016/j.mri.2019.04.009	2019	Paugam, F. and Lefeuvre, J. and Perone, C.S. and Gros, C. and Reich, D.S. and Sati, P. and Cohen-Adad, J.	France	École Centrale de Lyon	7	4	Retrospective methodological / technical development study	Magnetic Resonance Imaging	MRI; Segmentation; Deep learning; U-Net; cnn; Spinal cord; Marmoset	1	1	9	6	1	2	2 - 5 - 6 - 9	Mean Surface Distance (MSD), Hausdorff Surface Distance (HSD / HD), Skeletonized Hausdorff Distance (SHD), Skeletonized Median Distance (SMD), Conformity Coefficient (CC)	P	Y	R
https://www.scopus.com/inward/record.uri?eid=2-s2.0-85062421435&doi=10.1016%2Fj.mri.2019.02.013&partnerID=40&md5=222c563fe10b0a97bff73caf14822012	Differentiation of spinal metastases originated from lung and other cancers using radiomics and deep learning based on DCE-MRI	10.1016/j.mri.2019.02.013	2019	Lang, N. and Zhang, Y. and Zhang, E. and Zhang, J. and Chow, D. and Chang, P. and Yu, H.J. and Yuan, H. and Su, M.-Y.	China	Department of Radiology, Peking University Third Hospital (Beijing, China)	9	2	Retrospective study	Magnetic Resonance Imaging	DCE-MRI; Radiomics; Deep learning; Spinal metastases	1	2	2	5	3	2	1 - 3 - 5	Negative predictive value (NPV)	N	N	C
https://www.scopus.com/inward/record.uri?eid=2-s2.0-85068848787&doi=10.1002%2Fnbm.4114&partnerID=40&md5=b670924ecbad4aac36751e7bb059ac38	Prognosis of cervical myelopathy based on diffusion tensor imaging with artificial intelligence methods	10.1002/nbm.4114	2019	Jin, R. and Luk, K.D. and Cheung, J.P.Y. and Hu, Y.	China	Department of Orthopaedics and Traumatology, The University of Hong Kong	4	2	Prospective observational study	NMR in Biomedicine	artificial intelligence (AI); cervical myelopathy (CM); diffusion tensor imaging (DTI); prognosis	1	4	1	1 - 6	1	2	3 - 5	ANOVA significance	N	N	C
https://www.scopus.com/inward/record.uri?eid=2-s2.0-85064765007&doi=10.1016%2Fj.media.2019.04.012&partnerID=40&md5=98ec66e71ce866b7afcab36a3d216484	Direct automated quantitative measurement of spine by cascade amplifier regression network with manifold regularization	10.1016/j.media.2019.04.012	2019	Pang, S. and Su, Z. and Leung, S. and Nachum, I.B. and Chen, B. and Feng, Q. and Li, S.	China	Guangdong Provincial Key Laboratory of Medical Image Processing, School of Biomedical Engineering, Southern Medical University (Guangzhou, China)	7	4	Retrospective development and validation study	Medical Image Analysis	Deep learning; Spine; Local linear representation; Manifold learning	1	7	9	3	0	2	7	N/A	N	Y	R
https://www.scopus.com/inward/record.uri?eid=2-s2.0-85055517374&doi=10.1007%2Fs10278-018-0130-7&partnerID=40&md5=85cb49ccf583ab7614564ca8f67e629b	Automatic Lumbar MRI Detection and Identification Based on Deep Learning	10.1007/s10278-018-0130-7	2019	Zhou, Y. and Liu, Y. and Chen, Q. and Gu, G. and Sui, X.	China	The School of Electronic Engineering and Optoelectronic Technology, Nanjing University of Science and Technology (Nanjing, Jiangsu, China)	5	1	Retrospective study	Journal of Digital Imaging	Convolutional network; Deep learning; Lumbar detection; The similarity function	1	3	9	3	1	2	3 - 5 - 6	Detection (%), Mean, STD (Standard Deviation)	N	N	R
https://www.scopus.com/inward/record.uri?eid=2-s2.0-85061381552&doi=10.1016%2Fj.media.2019.02.005&partnerID=40&md5=7c3f1bfbfac04fa18cd4af0eb7c8e58a	Iterative fully convolutional neural networks for automatic vertebra segmentation and identification	10.1016/j.media.2019.02.005	2019	Lessmann, N. and Van Ginneken, B. and de Jong, P.A. and I≈°gum, I.	Netherlands	Image Sciences Institute, University Medical Center Utrecht	4	4	Retrospective development and validation study	Medical Image Analysis	Vertebra segmentation; Vertebra identification; Iterative instance segmentation; Deep learning	0	0	9	5	1	3	2 - 3	ASSD (Average Absolute Symmetric Surface Distance) , Linearly weighted kappa (κ) , False positives per scan, False negatives per scan	Y	N	M
https://www.scopus.com/inward/record.uri?eid=2-s2.0-85055101986&doi=10.1016%2Fj.neuroimage.2018.10.033&partnerID=40&md5=aad41e7ed78a930918956239e2da886b	Axons morphometry in the human spinal cord	10.1016/j.neuroimage.2018.10.033	2019	Duval, T. and Saliani, A. and Nami, H. and Nanci, A. and Stikov, N. and Leblond, H. and Cohen-Adad, J.	Canada	NeuroPoly Lab, Institute of Biomedical Engineering, Polytechnique Montreal (Montreal, QC)	7	5	Cross-sectional observational study	NeuroImage	axon morphometry; spinal cord; scanning electron microscopy; deep learning; segmentation; myelin; atlas/template	1	0	0	6	1	0	5 - 6	Pearson correlation coefficient (r),Coefficient of reproducibility, limit of agreement / Bland-Altman analysis	Y	Y	R
https://www.scopus.com/inward/record.uri?eid=2-s2.0-85066820541&doi=10.1186%2Fs41747-018-0060-7&partnerID=40&md5=02eb67d46c4c9b2b806b1b1d12023352	Generative models: an upcoming innovation in musculoskeletal radiology? A preliminary test in spine imaging	10.1186/s41747-018-0060-7	2018	Galbusera, F. and Bassani, T. and Casaroli, G. and Gitto, S. and Zanchetta, E. and Costa, F. and Sconfienza, L.M.	Italy	IRCCS Istituto Ortopedico Galeazzi (Milan)	7	4	Retrospective study	European Radiology Experimental	Lumbar vertebrae; Machine learning (deep learning); Magnetic resonance imaging; Neural network (computer); X-rays	1	8	9	3	4	2	N/A	MSE (Mean Squared Error), PSNR (Peak Signal-to-Noise Ratio), SSIM (Structural Similarity Index), VIPF (Visual Information Fidelity in Pixel Domain), CPBD (Cumulative Probability of Blur Detection), κ-statistics / concordance	N	Y	R
https://www.scopus.com/inward/record.uri?eid=2-s2.0-85052727356&doi=10.1038%2Fs41598-018-31486-3&partnerID=40&md5=a3d09f67586561434751343460c85dba	Performance of the deep convolutional neural network based magnetic resonance image scoring algorithm for differentiating between tuberculous and pyogenic spondylitis	10.1038/s41598-018-31486-3	2018	Kim, K. and Kim, S. and Lee, Y.H. and Lee, S.H. and Lee, H.S. and Kim, S.	Republic of Korea	Department of Radiology, Gangnam Severance Hospital, Yonsei University College of Medicine (Seoul)	6	4	Retrospective study	Scientific Reports	deep convolutional neural network; magnetic resonance imaging; tuberculous spondylitis; pyogenic spondylitis; differential diagnosis	1	2	5	2 - 3	1	1	1 - 3 - 5	κ statistics / linear-weighted kappa	N	N	P
https://www.scopus.com/inward/record.uri?eid=2-s2.0-85041439310&doi=10.1016%2Fj.media.2018.01.004&partnerID=40&md5=b8f22bbcc459bfbb52146cd231e0c83e	3D multi-scale FCN with random modality voxel dropout learning for Intervertebral Disc Localization and Segmentation from Multi-modality MR Images	10.1016/j.media.2018.01.004	2018	Li, X. and Dou, Q. and Chen, H. and Fu, C.-W. and Qi, X. and Belavy, D.L. and Armbrecht, G. and Felsenberg, D. and Zheng, G. and Heng, P.-A.	China	Department of Computer Science and Engineering, The Chinese University of Hong Kong (Hong Kong, China)	10	4	Retrospective development and validation study	Medical Image Analysis	Multi-modality; Magnetic resonance imaging; Intervertebral discs; Localization; Segmentation; Deep learning; Dropout	1	1	0	2 - 3 - 4	2	2	2	Mean Localization Distance (MLD), Standard deviation of localization distance (SD), SDDOC (standard deviation of Dice overlap coefficients), arvd (absolute value of relative volume difference), Time cost / inference time	Y	N	R
https://www.scopus.com/inward/record.uri?eid=2-s2.0-85009268742&doi=10.1007%2Fs10278-017-9945-x&partnerID=40&md5=291bd82cd6fe4e223d972ad7d796f590	Detection and Labeling of Vertebrae in MR Images Using Deep Learning with Clinical Annotations as Training Data	10.1007/s10278-017-9945-x	2017	Forsberg, D. and Sj√∂blom, E. and Sunshine, J.L.	Sweden	Sectra, Linköping	3	2	Retrospective study	Journal of Digital Imaging	Archive; Artificial neural networks (ANNs); Machine learning; Magnetic resonance imaging	1	3	9	1-3	1	0	3 - 5 - 6	Average localization error (mm), Standard deviation of localization error, Labeling accuracy (%),Linear-weighted kappa	N	N	R
https://www.scopus.com/inward/record.uri?eid=2-s2.0-85011660161&doi=10.1007%2Fs00586-017-4956-3&partnerID=40&md5=10df342431c111cda36ffaea41fe2525	ISSLS PRIZE IN BIOENGINEERING SCIENCE 2017: Automation of reading of radiological features from magnetic resonance images (MRIs) of the lumbar spine without human intervention is comparable with an expert radiologist	10.1007/s00586-017-4956-3	2017	Jamaludin, A. and Lootus, M. and Kadir, T. and Zisserman, A. and Urban, J. and Batti√©, M.C. and Fairbank, J. and McCall, I.	United Kingdom	Department of Engineering Science, University of Oxford (Oxford, UK)	9	8	Retrospective multicenter development and validation study	European Spine Journal	Automated grading; Pfirrmann grading; Modic changes; Disc herniation; Disc bulge; Spondylolisthesis; Disc classification; Disc detection; Disc analysis; Vertebrae analysis; Deep learning	1	2	1	3	1	1	3	Intra-rater agreement (%) , Reliability coefficients, Lin’s concordance correlation coefficient for ordinal ratings, Cohen’s kappa coefficient for dichotomous ratings, Maximum vertebral body corner detection error (2 mm)	N	N	R
https://www.scopus.com/inward/record.uri?eid=2-s2.0-84963930727&doi=10.1016%2Fj.compmedimag.2016.02.002&partnerID=40&md5=12efa518cc04735a8dbc6375b8079f7f	Multi-modal vertebrae recognition using Transformed Deep Convolution Network	10.1016/j.compmedimag.2016.02.002	2016	Cai, Y. and Landis, M. and Laidley, D. and Kornecki, A. and Lum, A. and Li, S.	Canada	Dept. of Medical Biophysics, Schulich School of Medicine and Dentistry, University of Western Ontario (London, ON, Canada)	6	2	Retrospective development and validation study	Computerized Medical Imaging and Graphics	Vertebra detection; Vertebra recognition; Deep learning; Convolution network	0	3	9	1 - 2 - 3 - 4	0	2	3 - 5	Detection error (mm), Mean / median / standard deviation of detection error, Labeling success rate / naming accuracy as task-specific reporting, Robustness / stability through standard deviation values	Y	N	R
	Vertebral Deformity Measurements at MRI, CT, and Radiography Using Deep Learning	10.1148/ryai.2021210015 WE - Emerging Sources Citation Index (ESCI)	2022	Suri, A and Jones, BC and Ng, G and Anabaraonye, N and Beyrer, P and Domi, A and Choi, G and Tang, S and Terry, A and Leichner, T and Fathali, I and Bastin, N and Chesnais, H and Taratuta, E and Kneeland, BJ and Rajapakse, CS	USA	Perelman School of Medicine, University of Pennsylvania (Departments of Radiology and Orthopedics)	16	1	Retrospective study	Radiology: Artificial Intelligence	Computer Aided Diagnosis (CAD); MRI; CT; Spine; Demineralization-Bone; Feature Detection	0	7	4	1 - 2 - 3	1	0	3 - 7	Pearson correlation coefficient (r) • Mean height percentage of error / relative height measurement error • Relative landmark error (%) in x and y directions • Section selection error distance • Standard deviation, interquartile range, and P values	N	N	R
	Generation and applications of synthetic computed tomography images for neurosurgical planning	10.3171/2024.1.JNS232196 WE - Science Citation Index Expanded (SCI-EXPANDED)	2024	Tan, YH and Patel, R and Wang, ZM and Luo, Y and Chen, JP and Luo, J and Chen, WL and Mao, ZG and Huang, RY and Wang, HJ and Bi, WL and Yao, S	China	The First Affiliated Hospital, Sun Yat-sen University (Department of Neurosurgery, Center for Pituitary Tumor Surgery)	12	6	Retrospective study	J Neurosurg	synthetic CT; conditional generative adversarial networks; MRI to CT; deep learning; neurosurgical planning; preoperative evaluation; skull base; surgical technique	1	8	9	N/A (cranial)	4	0	N/A	PSNR (Peak Signal-to-Noise Ratio), SSIM (Structural Similarity Index), LPIPS (Learned Perceptual Image Patch Similarity), Relative error (%) for anatomical measurements, Median relative error for skull base structures, Image conversion speed (synthetic CT slices per second)	N	N	R
https://www.scopus.com/inward/record.uri?eid=2-s2.0-85181191623&doi=10.1002%2Fjmri.29211&partnerID=40&md5=2400d60b6dbceb603952a3b1151ecfac	Deep Learning Algorithm of the SPARCC Scoring System in SI Joint MRI	10.1002/jmri.29211	2024	Lin, Y. and Cao, P. and Chan, S.C.W. and Lee, K.H. and Lau, V.W.H. and Chung, H.Y.	China	The University of Hong Kong, Department of Diagnostic Radiology	6	5	Prospective study	Journal of Magnetic Resonance Imaging	SPARCC scoring system; STIR‐MRI; deep learning; sacroiliitis	0	0	5	4	1	1	2 - 3 - 5 - 6	Intraclass correlation coefficient (ICC), Pearson correlation coefficient	N	N	R
https://www.scopus.com/inward/record.uri?eid=2-s2.0-85178914669&doi=10.1038%2Fs41598-023-48595-3&partnerID=40&md5=d25ccfb25afc8abb34cb170b40501b57	Automatic GAN-based MRI volume synthesis from US volumes: a proof of concept investigation	10.1038/s41598-023-48595-3	2023	Vukovic, D. and Ruvinov, I. and Antico, M. and Steffens, M. and Fontanarosa, D.	Australia	Queensland University of Technology, School of Clinical Sciences	5	3	Observational study	Scientific Reports	NOT MENTIONED	0	8	0	2	4	0	2 - 3	Overlap, Target Registration Error (TRE), Perceptual distance	N	N	R
https://www.scopus.com/inward/record.uri?eid=2-s2.0-85176508179&doi=10.1097%2FBRS.0000000000004816&partnerID=40&md5=1c73945031545dbabcc532f8bca14c3b	Artificial Intelligence to Preoperatively Predict Proximal Junction Kyphosis Following Adult Spinal Deformity Surgery: Soft Tissue Imaging May Be Necessary for Accurate Models	10.1097/BRS.0000000000004816	2023	Johnson, G.W. and Chanbour, H. and Ali, M.A. and Chen, J. and Metcalf, T. and Doss, D.J. and Younus, I. and Jonzzon, S. and Roth, S.G. and Abtahi, A.M. and Stephens, B.F. and Zuckerman, S.L.	USA	Vanderbilt University School of Medicine	12	3	Retrospective study	Spine	adult spinal deformity; artificial intelligence; deep learning; machine learning; magnetic resonance imaging; proximal junction kyphosis; scoliosis x-rays	0	4	8	2	2	2	5	Youden index, P values / one-sample Student t test on Youden indices	N	N	C
https://www.scopus.com/inward/record.uri?eid=2-s2.0-85139378143&doi=10.1093%2Frheumatology%2Fkeac059&partnerID=40&md5=a7b83edf655a4ede315f14945de304cb	Deep learning algorithms for magnetic resonance imaging of inflammatory sacroiliitis in axial spondyloarthritis	10.1093/rheumatology/keac059	2022	Lin, K.Y.Y. and Peng, C. and Lee, K.H. and Chan, S.C.W. and Chung, H.Y.	China	The University of Hong Kong, Department of Radiology	5	4	Prospective study	Rheumatology	axial spondyloarthritis; ankylosing spondylitis; MRI; sacroiliac joint; artificial intelligence; deep learning; inflammation; bone marrow edema	2	1	5	4	1	3	1 -2 - 5 - 6	Intraclass correlation coefficient (ICC), Cohen’s kappa coefficient, Positive predictive value (PPV) as reported terminology, Intersection over Union (IoU) used as a lesion-detection threshold/criterion, confusion matrix	N	N	R
https://www.cochranelibrary.com/central/doi/10.1002/central/CN-02365941/full	A deep-learning model for identifying fresh vertebral compression fractures on digital radiography	10.1007/s00330-021-08247-4	2022	Chen, W and Liu, X and Li, K and Luo, Y and Bai, S and Wu, J and Chen, W and Dong, M and Guo, D	China	The Second Affiliated Hospital of Chongqing Medical University, Department of Radiology	9	2	Retrospective study	European Radiology	Deep learning · Fractures · compression · Spine · Radiography	1	2	3	3	1	0	1 - 3 - 5	DeLong test	N	Y	R
https://ieeexplore.ieee.org/stamp/stamp.jsp?tp=&arnumber=10819446&isnumber=10982228	MA-SAM: A Multi-Atlas Guided SAM Using Pseudo Mask Prompts Without Manual Annotation for Spine Image Segmentation,	10.1109/TMI.2024.3524570.	2025	D. Fan	China	Nanjing University of Aeronautics and Astronautics, College of Artificial Intelligence	10	6	Retrospective study	IEEE Transactions on Medical Imaging	spine segmentation; segment anything model (SAM); multi-atlas; pseudo mask prompts; CT; MR; lumbosacral plexus	1	1	0	3 - 4	6	2	2 - 9	MSD (Mean Surface Distance), HD95 (95th percentile Hausdorff Distance), p-values from paired t-tests	N	Y	R
https://ieeexplore.ieee.org/stamp/stamp.jsp?tp=&arnumber=10086579&isnumber=10443311	Uncertainty Estimation in Unsupervised MR-CT Synthesis of Scoliotic Spines,	10.1109/OJEMB.2023.3262965.	2024	E. N. Karthik, F. Cheriet and C. Laporte	Canada	Department of Electrical Engineering, École de technologie supérieure	3	5	Retrospective	IEEE Open Journal of Engineering in Medicine and Biology	1	1	8	4	5	4	2	N/A	Aleatoric uncertainty, Epistemic uncertainty, Gradient correlation / gradient consistency (GC), Cycle-consistency L1 loss, Adversarial losses	P	Y	A
	Classification of Shoulder X-ray Images with Deep Learning Ensemble Models	10.3390/app11062723 WE - Science Citation Index Expanded (SCI-EXPANDED)	2021	Uysal, F and Hardala√ß, F and Peker, O and Tolunay, T and Tokg√∂z, N	Turkey	Department of Electrical and Electronics Engineering, Faculty of Engineering, Gazi University	5	3	Retrospective study	Applied Sciences	0	0	2	3	N/A	9	2	1 - 3 - 4 - 6	Cohen’s kappa, confusion matrix, ROC curves	Y	Y	R
	VIBESegmentator: full body MRI segmentation for the NAKO and UK Biobank	10.1007/s00330-025-12035-9	2025	Graf, R and Platzek, P and Riedel, EO and Ramsch√ºtz, C and Starck, S and M√∂ller, HK and Atad, M and V√∂lzke, H and B√ºlow, R and Schmidt, CO and R√ºdebusch, J and Jung, MT and Reisert, M and Weiss, J and L√∂ffler, MT and Bamberg, F and Wiestler, B and Paetzold, JC and Rueckert, D and Kirschke, JS	Germany	Department of Diagnostic and Interventional Neuroradiology, School of Medicine, TUM University Hospital Neuro-Kopf-Zentrum	20	7	Retrospective	European Radiology	1	1	1	0	5	1	2	2	N/A	P	Y	R
	Deep learning-based quantification of osteonecrosis using magnetic resonance images in Gaucher disease	10.1016/j.bone.2024.117142	2024	Yu, BL and Whitmarsh, T and Riede, P and McDonald, S and Kaggie, JD and Cox, TM and Poole, KES and Deegan, P and MRC Gaucherite Consortium	United Kingdom	Department of Medicine, University of Cambridge	9	3	Retrospective	BONE	2	2	1	7	5	1	0	2 - 5	Volume similarity, average surface distance, Spearman’s ρ	N	P	R
https://www.scopus.com/inward/record.uri?eid=2-s2.0-85218934276&doi=10.1038%2Fs41598-024-72539-0&partnerID=40&md5=d87975beaa16f2d00619a1a3a294bc39	Multicenter study on predicting postoperative upper limb muscle strength improvement in cervical spinal cord injury patients using radiomics and deep learning	10.1038/s41598-024-72539-0	2025	Lin, F. and Wang, K. and Lai, M. and Wu, Y. and Chen, C. and Wang, Y. and Wang, R.	China	Fujian Medical University Union Hospital	7	5	Retrospective	Scientific Reports	1	1	4	3	1	9	2	1 - 3 - 5 - 6	PPV (positive predictive value) as reported terminology, NPV (negative predictive value), Decision Curve Analysis (DCA), Calibration curve, 95% confidence intervals, Intraclass correlation coefficient (ICC) for segmentation reliability	N	N	C
https://www.scopus.com/inward/record.uri?eid=2-s2.0-85213939615&doi=10.1038%2Fs41467-024-55422-4&partnerID=40&md5=338941dba58580d8e52867df96441bb2	Deep learning and genome-wide association meta-analyses of bone marrow adiposity in the UK Biobank	10.1038/s41467-024-55422-4	2025	Xu, W. and Mesa-Eguiagaray, I. and Morris, D.M. and Wang, C. and Gray, C.D. and Sj√∂str√∂m, S. and Papanastasiou, G. and Badr, S. and Paccou, J. and Li, X. and Timmers, P.R.H.J. and Timofeeva, M. and Farrington, S.M. and Dunlop, M.G. and Semple, S.I. and MacGillivray, T. and Theodoratou, E. and Cawthorn, W.P.	United Kingdom	Centre for Global Health and Molecular Epidemiology, Usher Institute, University of Edinburgh	18	13	Retrospective	Nature Communications	1	1	7	0	5	2	0	0	Spearman’s correlation coefficient, Beta coefficient (β), SNP-based heritability (h²SNP), Genetic correlation (rg), Genomic inflation / LDSC intercept (λGC, intercept), I² heterogeneity statistic, Z-scores in TWAS, Posterior probability of colocalization (PPH4), p-values	Y	Y	A
https://www.scopus.com/inward/record.uri?eid=2-s2.0-105015302204&doi=10.1016%2Fj.cmpb.2025.109043&partnerID=40&md5=0128bedbb7bd733fb17fd84e45e9011c	A weakly-supervised deep learning model for fast localisation and delineation of the skeleton, internal organs, and spinal canal on whole-body diffusion-weighted MRI (WB-DWI)	10.1016/j.cmpb.2025.109043	2025	Candito, A. and Dragan, A. and Holbrey, R. and Ribeiro, A. and Donners, R. and Messiou, C. and Tunariu, N. and Koh, D.-M. and Blackledge, M.D.	United Kingdom	The Institute of Cancer Research, London	9	3	Retrospective	Computer Methods and Programs in Biomedicine	1	1	1	2	5	2	2	2	average surface distance, relative median ADC differences, Gwet’s AC1, log-loss, computational time, Percentage agreement	N	N	A
https://www.scopus.com/inward/record.uri?eid=2-s2.0-105000033566&doi=10.1186%2Fs40644-025-00850-8&partnerID=40&md5=bcc3ba3cb2f49c3688feb6e7bed4633c	Development and evaluation of a deep learning framework for pelvic and sacral tumor segmentation from multi-sequence MRI: a retrospective study	10.1186/s40644-025-00850-8	2025	Yin, P. and Chen, W. and Fan, Q. and Yu, R. and Liu, X. and Liu, T. and Wang, D. and Hong, N.	China	Department of Radiology, Peking University People’s Hospital	8	2	Retrospective	Cancer Imaging	1	1	1	2	4	1	2	2 - 9	N/A	N	Y	R
https://www.scopus.com/inward/record.uri?eid=2-s2.0-105003201293&doi=10.1016%2Fj.bspc.2025.107794&partnerID=40&md5=cb743e0451ef68d05144a5e5345137d0	Medical image denoising using optimal attention block-based pyramid denoising network	10.1016/j.bspc.2025.107794	2025	Jain, V. and Datar, A. and Jain, Y.K.	India	Department of Electronics & Instrumentation Engineering, Rajiv Gandhi Proudyogiki Vishwavidyalaya	3	2	Experimental	Biomedical Signal Processing and Control	0	0	5	9	3	0 (OABPDN)	2	N/A	PSNR, SSIM, FSIM,MSE, execution time	Y	N	A
https://www.scopus.com/inward/record.uri?eid=2-s2.0-85203194313&doi=10.1007%2Fs00330-024-11047-1&partnerID=40&md5=b975b55ce43ae10f14635b915b115916	Generating synthetic high-resolution spinal STIR and T1w images from T2w FSE and low-resolution axial Dixon	10.1007/s00330-024-11047-1	2025	Graf, R. and Platzek, P.-S. and Riedel, E.O. and Kim, S.H. and Lenhart, N. and Ramsch√ºtz, C. and Paprottka, K.J. and Kertels, O.R. and M√∂ller, H.K. and Atad, M. and B√ºlow, R. and Werner, N. and V√∂lzke, H. and Schmidt, C.O. and Wiestler, B. and Paetzold, J.C. and Rueckert, D. and Kirschke, J.S.	Germany	Department of Diagnostic and Interventional Neuroradiology, School of Medicine, Technical University of Munich	18	5	Retrospective	European Radiology	1	1	8	9	5	4	3	N/A	PSNR (Peak Signal-to-Noise Ratio), SSIM (Structural Similarity Index Measure), L1 absolute error, MSE (Mean Squared Error), fleiss kappa, misclassification rate in the turing test	N	P	R
https://www.scopus.com/inward/record.uri?eid=2-s2.0-105012630484&doi=10.1007%2Fs41870-025-02666-y&partnerID=40&md5=1020c8945505bdab88e8138fed83517a	BPBO-LSTM-BiGRU: generative adversial network with brood Parasitism-Based optimization for spinal muscular atrophy using multiple visual modalities	10.1007/s41870-025-02666-y	2025	Sheikh, T. and Virdee, B. and Divya, D. and Ansari, S.H. and Lakkakula, S.	India	Department of Artificial Intelligence & Data Science, Koneru Lakshmaiah Education Foundation, Vaddeswaram, Andhra Pradesh, India (also affiliated with School of Computing & Digital Media, London Metropolitan University, London, UK)	5	4	Retrospective	International Journal of Information Technology (Singapore)		0	2	6	6	3	2	3 - 4 - 6 - 9	Cohen Kappa score	N	N	C
https://www.scopus.com/inward/record.uri?eid=2-s2.0-85180657989&doi=10.3390%2Fa16120564&partnerID=40&md5=db41556ba7dcdb3cae04b400ae8f67f0	Deep Learning Based on EfficientNet for Multiorgan Segmentation of Thoracic Structures on a 0.35 T MR-Linac Radiation Therapy System	10.3390/a16120564	2023	Chekroun, M. and Mourchid, Y. and Bessi√®res, I. and Lalande, A.	France	CESI LINEACT Laboratory	4	4	Retrospective	Algorithms	1	1	1	2	2	1	2	2 - 9	HD, Bland–Altman, correlation coefficient	N	N	R
https://www.scopus.com/inward/record.uri?eid=2-s2.0-85160471810&doi=10.1186%2Fs12916-023-02898-4&partnerID=40&md5=be548816cd8860d74da880a44a1343a0	Multimodal-based machine learning strategy for accurate and non-invasive prediction of intramedullary glioma grade and mutation status of molecular markers: a retrospective study	10.1186/s12916-023-02898-4	2023	Ma, C. and Wang, L. and Song, D. and Gao, C. and Jing, L. and Lu, Y. and Liu, D. and Man, W. and Yang, K. and Meng, Z. and Zhang, H. and Xue, P. and Zhang, Y. and Guo, F. and Wang, G.	China	School of Clinical Medicine, Tsinghua University	15	7	Retrospective	BMC Medicine	1	1	0	2	6	9	2	1 - 2 - 3 - 4 - 5	Intraclass correlation coefficient (ICC)	N	N	P
https://www.scopus.com/inward/record.uri?eid=2-s2.0-85164269263&doi=10.1371%2Fjournal.pone.0280316&partnerID=40&md5=ce72376a809e01bfd3e154937d339412	A deep learning approach to private data sharing of medical images using conditional generative adversarial networks (GANs)	10.1371/journal.pone.0280316	2023	Sun, H. and Plawinski, J. and Subramaniam, S. and Jamaludin, A. and Kadir, T. and Readie, A. and Ligozio, G. and Ohlssen, D. and Baillie, M. and Coroller, T.	USA	Department of Statistics, Purdue University, West Lafayette, IN, United States of America	10	4	Metodological and technical development study	PLOS ONE		2	8	9	5	4	2	1 - 3	N/A	P	Y	A
https://www.scopus.com/inward/record.uri?eid=2-s2.0-85119051876&doi=10.1016%2Fj.radi.2021.10.006&partnerID=40&md5=9654cec98876bb70d36d8642f6563382	Virtual magnetic resonance lumbar spine images generated from computed tomography images using conditional generative adversarial networks	10.1016/j.radi.2021.10.006	2022	Gotoh, M. and Nakaura, T. and Funama, Y. and Morita, K. and Sakabe, D. and Uetani, H. and Nagayama, Y. and Kidoh, M. and Hatemura, M. and Masuda, T. and Hirai, T.	Japan	Department of Radiology, Kumamoto University Hospital, Japan	11	3	Retrospective study	Radiography		0	8	9	3	4	0	7 - 8 - 9	N/A	N	N	A
https://www.scopus.com/inward/record.uri?eid=2-s2.0-85111916354&doi=10.1002%2Fmp.15137&partnerID=40&md5=b0a2e57d264063d67456934c265c94d1	MRI-based radiomics analysis for predicting the EGFR mutation based on thoracic spinal metastases in lung adenocarcinoma patients	10.1002/mp.15137	2021	Ren, M. and Yang, H. and Lai, Q. and Shi, D. and Liu, G. and Shuang, X. and Su, J. and Xie, L. and Dong, Y. and Jiang, X.	China	Department of Biomedical Engineering, School of Fundamental Sciences, China Medical University, Shenyang, P.R. China	10	5	Retrospective study	Medical Physics		1	4	9	2	1	2	1 - 5	N/A	N	N	P
https://www.scopus.com/inward/record.uri?eid=2-s2.0-85077858150&doi=10.1002%2Fmp.13976&partnerID=40&md5=bbc44a0b88d5bdf20397d25d3a01c0f3	Multimodality image registration in the head-and-neck using a deep learning-derived synthetic CT as a bridge	10.1002/mp.13976	2020	McKenzie, E.M. and Santhanam, A. and Ruan, D. and O'Connor, D. and Cao, M. and Sheng, K.	USA	Department of Radiation Oncology, David Geffen School of Medicine, University of California, Los Angeles, USA	6	1	Retrospective study	Medical Physics		1	6	9	7	4	2	7	MSE, Jacobian determinant	N	N	R
https://www.scopus.com/inward/record.uri?eid=2-s2.0-85084250457&doi=10.12928%2FTELKOMNIKA.v18i3.14746&partnerID=40&md5=530f24233b0b49ddf1476063679e3b65	Contour evolution method for precise boundary delineation of medical images	10.12928/TELKOMNIKA.v18i3.14746	2020	Natalia, F. and Meidia, H. and Afriliana, N. and Young, J.C. and Sudirman, S.	Indonesia	Universitas Multimedia Nusantara, Indonesia	5	2	Retrospective study	Telkomnika (Telecommunication Computing Electronics and Control)		1	1	9	3	0	2	N/A	Boundary F-score	N	N	A
https://www.scopus.com/inward/record.uri?eid=2-s2.0-85045472647&doi=10.1038%2Fs41598-018-24304-3&partnerID=40&md5=54ebd23a2683e293725124821330766e	Spinal cord gray matter segmentation using deep dilated convolutions	10.1038/s41598-018-24304-3	2018	Perone, C.S. and Calabrese, E. and Cohen-Adad, J.	Canada	NeuroPoly Lab, Institute of Biomedical Engineering, Polytechnique Montreal, Montreal, QC, H3T 1J4, Canada	3	4	Retrospective study	Scientific Reports		0	1	0	6	10	2	2 - 5 - 6 - 9	N/A	Y	Y	M

## Sheet: legend
🧩 1️⃣ Task Categories (What the AI/DL model does)							🧠 2️⃣ Pathology Categories (What disease/condition is studied)								🦴 3️⃣ Anatomical Region Categories					🧠Deep Learning Architecture Types				🧠Comparison?
Category	Typical Purpose / Example	Symbol					Category	Example	Symbol						Region	Description	Symbol			Category	Typical Use / Examples	Symbol		Category	Definition / Example	Symbol
Segmentation	Delineating spinal structures (vertebrae, discs, cord, lesions) on MRI.	1					Degenerative / Disc disease	Disc herniation, degeneration, spondylosis, Modic changes, stenosis.	1						Cervical spine	C1–C7, upper spine, cord compression, trauma, degenerative disease.	1			CNN (Convolutional Neural Network)	Standard architecture for image-based tasks (e.g., U-Net, ResNet, VGG).	1		Yes – Radiologist comparison	Compared model performance with one or more radiologists.	1
Classification	Disease categorization (normal vs abnormal, tumor type, degenerative stage, etc.).	2					Tumor / Oncologic	Intramedullary, extramedullary, vertebral metastases, meningioma, schwannoma.	2						Thoracic spine	T1–T12, less common but relevant for metastases or deformities.	2			3D CNN	Volume-based processing (3D U-Net, V-Net).	2		Yes – Algorithmic comparison	Compared with conventional ML or another DL model (e.g., ResNet vs. U-Net).	2
Detection / Localization	Automatic identification of lesions (e.g., tumor, fracture, stenosis).	3					Traumatic	Vertebral fractures, spinal cord injury, trauma-related deformities.	3						Lumbar spine	L1–L5/S1, most frequent region in degenerative spine studies.	3			RNN / LSTM	Temporal/spatiotemporal data, less common in imaging.	3		Yes – Hybrid (Radiologist + Model)	Both human and algorithmic benchmarks.	3
Diagnosis / Prediction	Clinical decision support, prognosis prediction, surgical outcome forecasting.	4					Deformity / Alignment	Scoliosis, kyphosis, lordosis, sagittal imbalance.	4						Sacral / Lumbosacral junction	Sacral pathologies, tethered cord, disc degeneration.	4			GAN (Generative Adversarial Network)	Image synthesis, super-resolution, artifact correction.	4		No – Non-comparison	No baseline comparator; descriptive performance only.	0
Image Reconstruction / Enhancement	Denoising, super-resolution, artifact reduction, motion correction.	5					Inflammatory / Infectious	Spondylodiscitis, tuberculosis, autoimmune/inflammatory spine disease.	5						Whole spine	Pan-spinal datasets, scoliosis, deformity studies, or 3D reconstruction.	5			Transformer / Vision Transformer (ViT)	Emerging architecture for segmentation and classification.	5
Registration	Aligning multimodal or longitudinal images (e.g., MRI to CT, or pre-/post-op scans).	6					Congenital / Developmental	Chiari malformation, tethered cord, spina bifida, vertebral anomalies.	6						Spinal cord	Focused on cord lesions, atrophy, demyelination, or injury.	6			Hybrid CNN–Transformer Models	Combining convolutional and attention mechanisms.	6
Radiomics / Feature Extraction	Quantitative feature mining for prediction or classification.	7					Vascular / Ischemic	AVMs, infarcts, hemorrhages of spinal cord.	7						Cranio-cervical junction	Chiari malformation, instability, malformations.	7			Autoencoder / Variational Autoencoder (VAE)	Feature learning, denoising, unsupervised representation.	7
Image Synthesis / Generation	Generating synthetic MRIs or domain translation (CT↔MRI, modality augmentation).	8					Postoperative / Instrumented Spine	Hardware evaluation, fusion status, complications.	8											Graph Neural Network (GNN)	Modeling spine as structured graph (vertebrae relationships).	8
Intraoperative / Navigation Support	Real-time imaging or guidance applications (AI-assisted surgery).	9					Non-specific / Multiple Pathologies	Broad datasets combining various spinal conditions.	9											Ensemble / Multi-model Networks	Combined CNNs or multimodal integration.	9
Comprehensive / Multi-task Models	Studies performing several of the above simultaneously.	0					Normal Anatomy / Healthy Subjects	Algorithm development on normal scans.	0											Other / Custom DL models	Custom or novel architectures not fitting standard classes.	0
Funding source			🧠 1. Performance Metrics					🔍 2. Transparency & Reproducibility — Open-source Data (Y/N)								💻 3. Transparency & Reproducibility — Open-source Code (Y/N)							🩻 4. Ground Truth Type
Source	Symbol		Metric			Symbol										• Mark “Y” if a public repository (GitHub, GitLab, Zenodo, etc.) is explicitly linked or cited.							Radiologist Annotation (R) – manual or consensus segmentation/labeling by radiologists.
Public	1		- AUC (Area Under ROC Curve)			1		Y = Used public dataset(s).								• Mark “N” if no code access or only pseudocode / pipeline description is given.							Pathology Confirmation (P) – histologic or biopsy-proven diagnosis.
Industry	2		- Dice Coefficient (segmentation overlap)			2		N = Private / Institutional-only.								• Mark “P” if only part of the code (e.g., preprocessing or evaluation) is available.							Surgical Finding (S) – intraoperative confirmation.
None	0		- Accuracy (%)			3		P = Mixed datasets (e.g., SpineWeb + local hospital).															Clinical Diagnosis (C) – electronic health record or clinical follow-up confirmation.
			- F1-score			4																	Automated Derived (A) – labels derived algorithmically (e.g., prior segmentation).
			- Sensitivity / Specificity			5																	Mixed (M) – combination (e.g., radiologist + pathology).
			- Precision / Recall			6
			- MAE (Mean Absolute Error)			7
			- RMSE (Root Mean Squared Error)			8
			- IoU (Intersection over Union)			9
			- R² (Coefficient of Determination)			0
